# Supplementary material for: Intramolecular cation–π interactions in protonated phenylalanine derivatives
Source: Royal Society of Chemistry journal article supplement (doi:10.1039/c6cp07337a), 2016-12-01
Supplement: c6cp07337a1.pdf [file c6cp07337a1.pdf]

# **Intramolecular Cation- $\pi$ Interactions in Protonated Phenylalanine Derivatives**

## **Supporting Information**

Weiqliang Fu,<sup>1</sup> Patrick J. J. Carr,<sup>1</sup> Michael J. Lecours,<sup>1</sup> Michael Burt,<sup>1</sup> Rick A. Marta,<sup>1</sup> Vincent Steinmetz,<sup>2</sup> Eric Fillion,<sup>1</sup> Terrance B. McMahon,<sup>1</sup> W. Scott Hopkins<sup>1,\*</sup>

1. Department of Chemistry, University of Waterloo, Waterloo, ON, Canada, N2L 3G1.

2. Laboratoire Chimie Physique – CLIO, Bâtiment 201, Porte 2, Campus Universitaire d'Orsay, Orsay, France, 91405

## Table of Contents

|                                                                                                                    |    |
|--------------------------------------------------------------------------------------------------------------------|----|
| Table S1 Gibbs' Energies and Relative energies of Phe·H <sup>+</sup> .....                                         | 4  |
| Phe·H <sup>+</sup> : The XYZ atomic coordinates and structures .....                                               | 5  |
| Phe·H <sup>+</sup> : The comparison between experimental IRMPD and calculated IR spectra .....                     | 7  |
| Table S2 Gibbs' Energies and Relative energies of 3F-Phe·H <sup>+</sup> .....                                      | 8  |
| 3-F-Phe·H <sup>+</sup> : The XYZ atomic coordinates and structures .....                                           | 9  |
| 3-F-Phe·H <sup>+</sup> : The comparison between experimental IRMPD and calculated IR spectra .....                 | 13 |
| Table S3 Gibbs' Energies and Relative energies of 4-F-Phe·H <sup>+</sup> .....                                     | 15 |
| 4-F-Phe·H <sup>+</sup> : The XYZ atomic coordinates and structures .....                                           | 16 |
| 4-F-Phe·H <sup>+</sup> : The comparison between experimental IRMPD and calculated IR spectra .....                 | 19 |
| Table S4 Gibbs' Energies and Relative energies of 2,5-F <sub>2</sub> -Phe·H <sup>+</sup> .....                     | 20 |
| 2,5-F <sub>2</sub> -Phe·H <sup>+</sup> : The XYZ atomic coordinates and structures .....                           | 21 |
| 2,5-F <sub>2</sub> -Phe·H <sup>+</sup> : The comparison between experimental IRMPD and calculated IR spectra ..... | 24 |
| Table S5 Gibbs' Energies and Relative energies of 3,5-F <sub>2</sub> -Phe·H <sup>+</sup> .....                     | 25 |
| 3,5-F <sub>2</sub> -Phe·H <sup>+</sup> : The XYZ atomic coordinates and structures .....                           | 26 |
| 3,5-F <sub>2</sub> -Phe·H <sup>+</sup> : The comparison between experimental IRMPD and calculated IR spectra ..... | 29 |
| Table S6 Gibbs' Energies and Relative energies of F <sub>5</sub> -Phe·H <sup>+</sup> .....                         | 30 |
| F <sub>5</sub> -Phe·H <sup>+</sup> : The XYZ atomic coordinates and structures .....                               | 31 |
| F <sub>5</sub> -Phe·H <sup>+</sup> : The comparison between experimental IRMPD and calculated IR spectra .....     | 34 |
| Table S7 Gibbs' Energies and Relative energies of 3-CN-Phe·H <sup>+</sup> .....                                    | 35 |

|                                                                                                                                                 |    |
|-------------------------------------------------------------------------------------------------------------------------------------------------|----|
| 3-CN-Phe·H <sup>+</sup> : The XYZ atomic coordinates and structures.....                                                                        | 36 |
| 3-CN-Phe·H <sup>+</sup> : The comparison between experimental IRMPD and calculated IR spectra .....                                             | 39 |
| Table S8 Gibbs' Energies and Relative energies of 3-CF <sub>3</sub> -Phe·H <sup>+</sup> .....                                                   | 40 |
| 3-CF <sub>3</sub> -Phe·H <sup>+</sup> : The XYZ atomic coordinates and structures.....                                                          | 41 |
| 3-CF <sub>3</sub> -Phe·H <sup>+</sup> : The comparison between experimental IRMPD and calculated IR spectra.....                                | 46 |
| Table S9 Gibbs' Energies and Relative energies of 3,4-(OMe) <sub>2</sub> -Phe·H <sup>+</sup> .....                                              | 48 |
| 3,4-(OMe) <sub>2</sub> -Phe·H <sup>+</sup> : The XYZ atomic coordinates and structures.....                                                     | 49 |
| 3,4-(OMe) <sub>2</sub> -Phe·H <sup>+</sup> : The comparison between experimental IRMPD and calculated IR spectra.....                           | 57 |
| Table S10 Gibbs' Energies and Relative energies of 4-NO <sub>2</sub> -Phe·H <sup>+</sup> .....                                                  | 60 |
| 4-NO <sub>2</sub> -Phe·H <sup>+</sup> : The XYZ atomic coordinates and structures.....                                                          | 61 |
| 4-NO <sub>2</sub> -Phe·H <sup>+</sup> : The comparison between experimental IRMPD and calculated IR spectra.....                                | 64 |
| Table S11 Assignments of vibrational modes of fluorinated Phe·H <sup>+</sup> .....                                                              | 65 |
| Table S12 Assignments of vibrational modes of protonated Phe derivatives (different EWGs/EDGs) .....                                            | 66 |
| Table S13 The calculated proton affinities and gas phase basicities of Phe and its derivatives at the B3LYP/6-311++G(d,p) level of theory. .... | 67 |

Summary of Gibbs' energies and relative energies at 298 K are given in kJ/mol. Calculations used the B3LYP functional and 6-311++G(d,p) basis set. The XYZ atomic coordinates and calculated IR spectra of isomers with relative energies within 20 kJ/mol are provided.

**Phe•H<sup>+</sup>**

**Table S1 The Gibbs' Energies and Relative energies of Phe•H<sup>+</sup>**

| Phe Isomer | Gibbs (hartree) | Relative energy (kJ/mol) |
|------------|-----------------|--------------------------|
| Isomer 1   | -555.1621       | 0.00                     |
| Isomer 2   | -555.1602       | 4.95                     |
| Isomer 3   | -555.1535       | 22.78                    |
| Isomer 4   | -555.1257       | 95.68                    |
| Isomer 5   | -555.1253       | 96.63                    |
| Isomer 6   | -555.1252       | 96.86                    |
| Isomer 7   | -555.1248       | 98.12                    |
| Isomer 8   | -555.1162       | 120.52                   |
| Isomer 9   | -555.1157       | 121.93                   |
| Isomer 10  | -555.1122       | 130.97                   |
| Isomer 11  | -555.1111       | 133.91                   |
| Isomer 12  | -555.1095       | 138.06                   |
| Isomer 13  | -555.1094       | 138.53                   |
| Isomer 14  | -555.1094       | 138.56                   |
| Isomer 15  | -555.1072       | 144.17                   |

**Phe·H<sup>+</sup>: The XYZ atomic coordinates and structures**

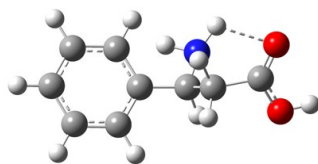

GM, 0.0kJ/mol

|   |           |           |           |
|---|-----------|-----------|-----------|
| N | -1.007741 | -1.151757 | 1.052125  |
| H | -1.142262 | -1.144585 | 2.065677  |
| H | -0.020042 | -1.377529 | 0.851170  |
| H | -1.640283 | -1.870094 | 0.662466  |
| C | -1.368653 | 0.173450  | 0.412991  |
| H | -1.226182 | 0.953359  | 1.160744  |
| C | -0.459407 | 0.431546  | -0.816569 |
| C | -2.843019 | 0.051589  | 0.028115  |
| H | -0.739278 | -0.255498 | -1.620804 |
| H | -0.683252 | 1.441695  | -1.165121 |
| C | 1.005532  | 0.271000  | -0.471551 |
| O | -3.409272 | -1.013892 | 0.009097  |
| C | 1.682253  | -0.910569 | -0.807267 |
| C | 1.693943  | 1.273998  | 0.223808  |
| H | 1.182043  | -1.675417 | -1.395627 |
| C | 3.021431  | -1.087083 | -0.450500 |
| C | 3.029187  | 1.097109  | 0.575692  |
| H | 1.194825  | 2.206321  | 0.469538  |
| H | 3.538359  | -1.996760 | -0.732118 |
| C | 3.693273  | -0.085202 | 0.243928  |
| H | 3.556207  | 1.886016  | 1.099170  |
| H | 4.734364  | -0.215922 | 0.513592  |
| O | -3.358615 | 1.226125  | -0.300012 |
| H | -4.284450 | 1.117828  | -0.578123 |

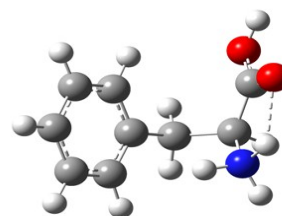

Isomer 2, 5.0kJ/mol

|           |           |           |
|-----------|-----------|-----------|
| 1.145969  | 1.653908  | -0.854047 |
| 1.370026  | 2.648287  | -0.795000 |
| 0.120231  | 1.543524  | -0.940993 |
| 1.626712  | 0.860396  | 0.344181  |
| 2.445041  | 1.418729  | 0.805284  |
| 0.481901  | 0.648992  | 1.365719  |
| 2.234175  | -0.413909 | -0.258683 |
| 0.843874  | -0.069088 | 2.103309  |
| 0.321087  | 1.591790  | 1.895079  |
| -0.804467 | 0.185507  | 0.715551  |
| -1.788910 | 1.122276  | 0.364014  |
| -1.022206 | -1.166255 | 0.418971  |
| -1.671679 | 2.165619  | 0.646899  |
| -2.959095 | 0.717427  | -0.281992 |
| -2.191501 | -1.568716 | -0.221415 |
| -0.290124 | -1.910722 | 0.713469  |
| -3.718092 | 1.449319  | -0.531665 |
| -3.157849 | -0.628074 | -0.579244 |
| -2.354061 | -2.619043 | -0.432301 |
| -4.068454 | -0.946540 | -1.072197 |
| 2.614259  | -1.270272 | 0.676701  |
| 3.043041  | -2.039956 | 0.264813  |
| 2.365652  | -0.553546 | -1.450049 |
| 1.585479  | 1.235404  | -1.694201 |

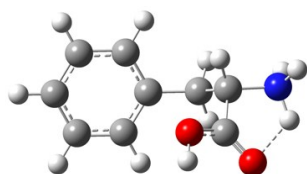

Isomer 3, 22.8kJ/mol

|   |          |           |           |
|---|----------|-----------|-----------|
| N | 2.967850 | -1.234204 | 0.153791  |
| H | 3.574616 | -1.451565 | -0.641364 |
| H | 2.857584 | -2.080683 | 0.717810  |
| H | 3.436293 | -0.493356 | 0.708296  |
| C | 1.624108 | -0.656744 | -0.278037 |

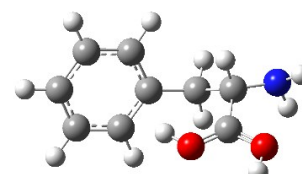

Isomer 4, 95.7kJ/mol

|           |           |           |
|-----------|-----------|-----------|
| -2.918096 | -1.398723 | -0.220192 |
| -3.281527 | -1.160286 | -1.134963 |
| -3.652843 | -1.356296 | 0.474083  |
| -1.706438 | -0.721128 | 0.134937  |
| -1.407074 | -1.051539 | 1.141295  |

|   |           |           |           |           |           |           |
|---|-----------|-----------|-----------|-----------|-----------|-----------|
| H | 1.374084  | -1.065061 | -1.256633 | -0.544250 | -1.093334 | -0.836350 |
| C | 0.553470  | -1.035115 | 0.775145  | -1.829636 | 0.792397  | 0.300651  |
| C | 1.886497  | 0.851737  | -0.359887 | -0.553617 | -2.183953 | -0.871893 |
| H | 0.552010  | -2.129150 | 0.854796  | -0.792564 | -0.742863 | -1.842532 |
| H | 0.860733  | -0.634276 | 1.746549  | 0.822585  | -0.583447 | -0.419443 |
| C | -0.837994 | -0.548961 | 0.430250  | 1.489619  | 0.396479  | -1.174824 |
| O | 2.793793  | 1.355542  | 0.261145  | 1.457587  | -1.097057 | 0.724794  |
| C | -1.401422 | 0.526966  | 1.121048  | 1.039494  | 0.772619  | -2.088914 |
| C | -1.578233 | -1.182123 | -0.573718 | 2.752139  | 0.858921  | -0.788749 |
| H | -0.847606 | 1.012318  | 1.918773  | 2.713266  | -0.636460 | 1.104772  |
| C | -2.683678 | 0.971980  | 0.804448  | 0.978358  | -1.879466 | 1.304957  |
| C | -2.857493 | -0.735346 | -0.892176 | 3.257158  | 1.605265  | -1.390134 |
| H | -1.167550 | -2.038434 | -1.101054 | 3.361566  | 0.345580  | 0.351043  |
| H | -3.116111 | 1.800942  | 1.352058  | 3.194402  | -1.050371 | 1.982965  |
| C | -3.410828 | 0.344246  | -0.204436 | 4.342108  | 0.697551  | 0.648147  |
| H | -3.426043 | -1.235610 | -1.667052 | -0.845402 | 1.605856  | 0.348625  |
| H | -4.409489 | 0.687130  | -0.447363 | 0.028775  | 1.157987  | 0.137567  |
| O | 1.028194  | 1.471588  | -1.144553 | -3.008269 | 1.288393  | 0.431411  |
| H | 1.194067  | 2.430294  | -1.129919 | -2.995266 | 2.256719  | 0.559491  |

**Phe·H<sup>+</sup>: The comparison between experimental IRMPD and calculated IR spectra**

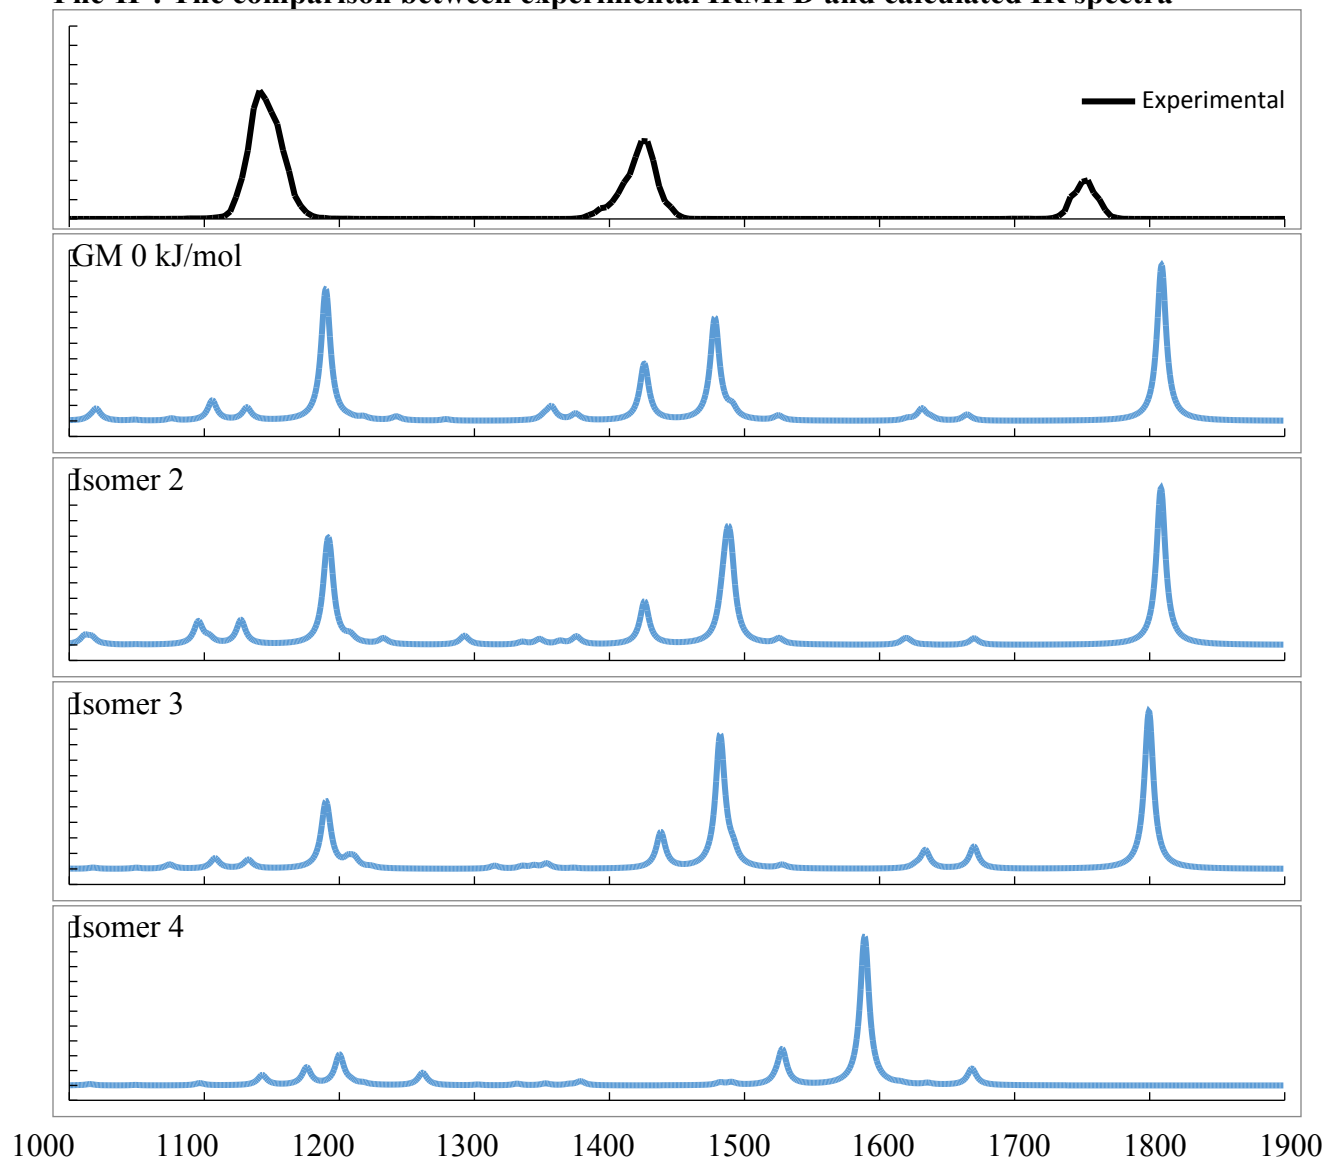

**3-F-Phe•H<sup>+</sup>****Table S2 The Gibbs' Energies and Relative energies of 3F-Phe•H<sup>+</sup>**

| 3F-Phe Isomer | Gibbs (hartree) | Relative energy (kJ/mol) |
|---------------|-----------------|--------------------------|
| Isomer 1      | -654.4359       | 0.00                     |
| Isomer 2      | -654.4356       | 0.64                     |
| Isomer 3      | -654.4345       | 3.53                     |
| Isomer 4      | -654.4343       | 4.05                     |
| Isomer 5      | -654.4306       | 13.85                    |
| Isomer 6      | -654.4305       | 13.96                    |
| Isomer 7      | -654.4295       | 16.71                    |
| Isomer 8      | -654.4293       | 17.09                    |
| Isomer 9      | -654.4281       | 20.36                    |
| Isomer 10     | -654.4223       | 35.48                    |
| Isomer 11     | -654.4220       | 36.34                    |
| Isomer 12     | -654.4217       | 37.14                    |
| Isomer 13     | -654.4216       | 37.42                    |
| Isomer 14     | -654.4212       | 38.52                    |
| Isomer 15     | -654.4209       | 39.30                    |



### 3-F-Phe·H<sup>+</sup>: The XYZ atomic coordinates and structures

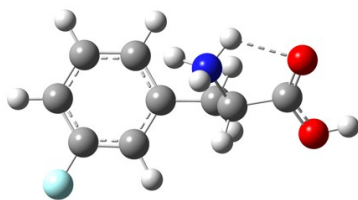

GM, 0.0kJ/mol

|   |           |           |           |
|---|-----------|-----------|-----------|
| C | -0.677902 | 0.108711  | -0.604073 |
| C | -1.491798 | -0.943434 | -0.167752 |
| C | -2.811995 | -0.676996 | 0.163384  |
| C | -3.359761 | 0.598250  | 0.085479  |
| C | -2.548053 | 1.638853  | -0.350229 |
| C | -1.212728 | 1.401484  | -0.692041 |
| H | -1.129989 | -1.963894 | -0.107580 |
| H | -4.398749 | 0.753209  | 0.347480  |
| H | -2.958690 | 2.637214  | -0.440388 |
| H | -0.610226 | 2.215163  | -1.084706 |
| C | 0.780766  | -0.135620 | -0.926123 |
| H | 0.919801  | -1.066287 | -1.479688 |
| H | 1.171567  | 0.672076  | -1.551973 |
| C | 1.639975  | -0.248387 | 0.359324  |
| H | 1.369714  | -1.143340 | 0.919548  |
| C | 3.139106  | -0.229335 | 0.056169  |
| N | 1.396250  | 0.950070  | 1.253834  |
| H | 1.459733  | 0.713298  | 2.246666  |
| H | 0.459998  | 1.343644  | 1.067974  |
| O | 3.820812  | 0.738781  | 0.288490  |
| O | 3.536023  | -1.361459 | -0.502382 |
| H | 4.483242  | -1.313768 | -0.719237 |
| F | -3.586421 | -1.693406 | 0.570773  |
| H | 2.137296  | 1.643119  | 1.054409  |

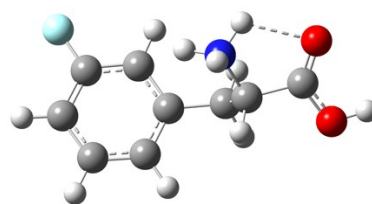

Isomer 2, 0.6kJ/mol

|           |           |           |
|-----------|-----------|-----------|
| 0.667154  | 0.478064  | -0.444546 |
| 1.471619  | -0.659365 | -0.603360 |
| 2.801449  | -0.608903 | -0.195910 |
| 3.361216  | 0.528274  | 0.363663  |
| 2.554969  | 1.655754  | 0.513041  |
| 1.218157  | 1.634811  | 0.119015  |
| 1.108645  | -1.556946 | -1.094145 |
| 4.403460  | 0.527619  | 0.656671  |
| 2.978198  | 2.560431  | 0.932565  |
| 0.614762  | 2.529916  | 0.226217  |
| -0.794117 | 0.421784  | -0.835953 |
| -1.116497 | 1.352052  | -1.307551 |
| -0.966520 | -0.381139 | -1.558881 |
| -1.710772 | 0.207138  | 0.395486  |
| -1.670370 | 1.074886  | 1.053602  |
| -3.153648 | -0.104663 | -0.005758 |
| -1.246589 | -0.997595 | 1.189035  |
| -0.237105 | -1.151706 | 1.040850  |
| -1.415946 | -0.890262 | 2.191895  |
| -3.612184 | -1.216588 | 0.089169  |
| -3.768220 | 0.967229  | -0.480132 |
| -4.670426 | 0.737824  | -0.762862 |
| 3.560268  | -1.703271 | -0.364277 |
| -1.797427 | -1.812565 | 0.870524  |

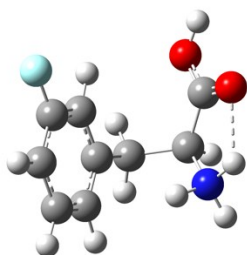

Isomer 3, 3.5kJ/mol

|   |           |           |           |
|---|-----------|-----------|-----------|
| C | -0.492178 | -0.591766 | -0.727325 |
| C | -0.969462 | 0.712224  | -0.553119 |

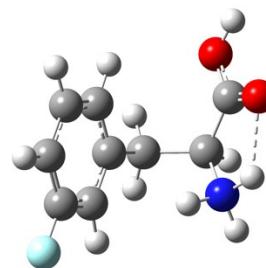

Isomer 4, 4.0kJ/mol

|          |           |          |
|----------|-----------|----------|
| 0.454765 | 0.080523  | 0.782687 |
| 1.549086 | -0.762480 | 0.534565 |

|   |           |           |           |           |           |           |
|---|-----------|-----------|-----------|-----------|-----------|-----------|
| C | -2.207337 | 0.900949  | 0.044174  | 2.671322  | -0.246771 | -0.105827 |
| C | -2.995653 | -0.155743 | 0.482658  | 2.750435  | 1.076928  | -0.507770 |
| C | -2.521991 | -1.449965 | 0.301210  | 1.663903  | 1.909948  | -0.248709 |
| C | -1.278577 | -1.671789 | -0.298493 | 0.522982  | 1.421010  | 0.386387  |
| H | -0.414712 | 1.576602  | -0.898226 | 1.577353  | -1.787792 | 0.890650  |
| H | -3.958577 | 0.043761  | 0.935481  | 3.647322  | 1.440314  | -0.993196 |
| H | -3.130151 | -2.291393 | 0.610465  | 1.712975  | 2.952742  | -0.537986 |
| H | -0.956265 | -2.691007 | -0.492154 | -0.300296 | 2.093300  | 0.598952  |
| C | 0.875461  | -0.840758 | -1.327763 | -0.789180 | -0.487544 | 1.433514  |
| H | 0.913921  | -1.835994 | -1.777980 | -0.533336 | -1.352541 | 2.050839  |
| H | 1.104000  | -0.126725 | -2.120606 | -1.264046 | 0.240663  | 2.092899  |
| C | 2.015852  | -0.737996 | -0.286290 | -1.859978 | -0.927925 | 0.406049  |
| H | 2.942703  | -1.136933 | -0.705470 | -2.626991 | -1.529178 | 0.900248  |
| C | 2.326910  | 0.672287  | 0.236891  | -2.584156 | 0.203068  | -0.338753 |
| N | 1.692635  | -1.539536 | 0.958781  | -1.251823 | -1.775685 | -0.693688 |
| H | 0.666114  | -1.643302 | 1.038903  | -0.244358 | -1.557101 | -0.776171 |
| H | 2.121614  | -2.466225 | 0.963822  | -1.361330 | -2.778824 | -0.536343 |
| O | 2.523569  | 1.532891  | -0.749186 | -3.089530 | 1.098585  | 0.494682  |
| O | 2.409696  | 0.906079  | 1.417596  | -2.688042 | 0.206457  | -1.540774 |
| H | 2.022722  | -0.986155 | 1.771101  | -1.711359 | -1.498847 | -1.580866 |
| F | -2.657181 | 2.155167  | 0.196757  | 3.711235  | -1.066947 | -0.326021 |
| H | 2.770537  | 2.401191  | -0.386562 | -3.588793 | 1.768709  | -0.003141 |

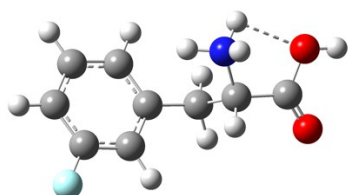

Isomer 5, 13.8kJ/mol

|   |           |           |           |
|---|-----------|-----------|-----------|
| C | -0.685988 | 0.128041  | -0.603208 |
| C | -1.496868 | -0.933455 | -0.183061 |
| C | -2.815012 | -0.674911 | 0.162378  |
| C | -3.364058 | 0.601169  | 0.113375  |
| C | -2.555710 | 1.651195  | -0.305995 |
| C | -1.222547 | 1.421862  | -0.660757 |
| H | -1.134084 | -1.954790 | -0.147670 |
| H | -4.401548 | 0.750008  | 0.384722  |
| H | -2.967753 | 2.650775  | -0.373364 |
| H | -0.623006 | 2.244252  | -1.039498 |
| C | 0.769036  | -0.115102 | -0.944489 |
| H | 0.901088  | -1.038866 | -1.511440 |
| H | 1.159957  | 0.698825  | -1.562656 |
| C | 1.634485  | -0.258254 | 0.330680  |

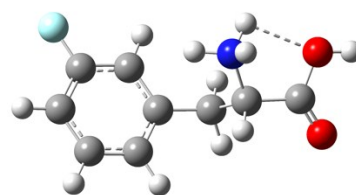

Isomer 6, 14.0kJ/mol

|           |           |           |
|-----------|-----------|-----------|
| 0.676229  | 0.467288  | -0.454180 |
| 1.480570  | -0.673313 | -0.589230 |
| 2.807482  | -0.618256 | -0.173781 |
| 3.365294  | 0.526879  | 0.371406  |
| 2.559554  | 1.657444  | 0.498155  |
| 1.225461  | 1.632038  | 0.095243  |
| 1.119896  | -1.578517 | -1.067410 |
| 4.405626  | 0.529461  | 0.671158  |
| 2.981022  | 2.568192  | 0.906107  |
| 0.622568  | 2.529564  | 0.183379  |
| -0.782333 | 0.413651  | -0.857647 |
| -1.099221 | 1.342965  | -1.335117 |
| -0.956479 | -0.391652 | -1.577974 |
| -1.705161 | 0.219131  | 0.369362  |

|   |           |           |           |           |           |           |
|---|-----------|-----------|-----------|-----------|-----------|-----------|
| H | 1.303748  | -1.121101 | 0.909255  | -1.596932 | 1.062447  | 1.051793  |
| C | 3.111970  | -0.444801 | -0.009492 | -3.173165 | 0.116697  | -0.041151 |
| N | 1.428357  | 0.961969  | 1.217980  | -1.267691 | -1.018773 | 1.140930  |
| H | 1.678928  | 0.779333  | 2.193037  | -1.606113 | -1.012958 | 2.106554  |
| H | 2.013500  | 1.739762  | 0.893626  | -0.235581 | -1.060636 | 1.145488  |
| O | 3.537865  | -1.450796 | -0.486249 | -3.793757 | 1.052900  | -0.440207 |
| O | 3.825525  | 0.672856  | 0.258488  | -3.629447 | -1.151769 | 0.069532  |
| H | 4.752828  | 0.542252  | -0.003592 | -4.551766 | -1.198039 | -0.235209 |
| F | -3.586169 | -1.699639 | 0.554057  | 3.565565  | -1.716917 | -0.319308 |
| H | 0.434403  | 1.241565  | 1.170716  | -1.637219 | -1.865562 | 0.694840  |

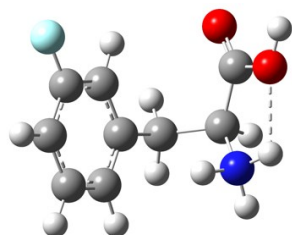

Isomer 7, 16.7kJ/mol

|   |           |           |           |
|---|-----------|-----------|-----------|
| C | 0.494095  | -0.610240 | 0.717289  |
| C | 0.992194  | 0.691217  | 0.578680  |
| C | 2.218401  | 0.876751  | -0.043861 |
| C | 2.974991  | -0.177634 | -0.540006 |
| C | 2.480468  | -1.468699 | -0.394057 |
| C | 1.248316  | -1.688300 | 0.228590  |
| H | 0.460425  | 1.551432  | 0.967237  |
| H | 3.930723  | 0.020144  | -1.008602 |
| H | 3.064352  | -2.309629 | -0.748256 |
| H | 0.911231  | -2.707933 | 0.392897  |
| C | -0.860192 | -0.855564 | 1.352185  |
| H | -0.903486 | -1.860821 | 1.779738  |
| H | -1.055785 | -0.153969 | 2.164795  |
| C | -2.023919 | -0.695639 | 0.350347  |
| H | -2.953523 | -1.077265 | 0.780808  |
| C | -2.295456 | 0.766172  | -0.032929 |
| N | -1.753813 | -1.520476 | -0.901495 |
| H | -0.740686 | -1.480289 | -1.110450 |
| H | -2.270120 | -1.141228 | -1.703283 |
| O | -2.306620 | 1.651358  | 0.765483  |
| O | -2.563805 | 0.889002  | -1.351304 |
| H | -2.777254 | 1.813900  | -1.561992 |
| F | 2.689698  | 2.126727  | -0.164877 |
| H | -2.006472 | -2.502808 | -0.769391 |

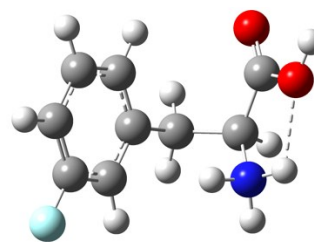

Isomer 8, 17.1kJ/mol

|   |           |           |           |
|---|-----------|-----------|-----------|
| C | 0.460656  | 0.089938  | 0.799591  |
| C | 1.526645  | -0.775799 | 0.507736  |
| C | 2.644012  | -0.278315 | -0.154391 |
| C | 2.747235  | 1.049985  | -0.535218 |
| C | 1.689789  | 1.905430  | -0.232429 |
| C | 0.552618  | 1.435837  | 0.424405  |
| H | 1.540334  | -1.806971 | 0.847601  |
| H | 3.640800  | 1.399117  | -1.037027 |
| H | 1.758822  | 2.952193  | -0.502939 |
| H | -0.249178 | 2.122675  | 0.668058  |
| C | -0.778047 | -0.453648 | 1.483639  |
| H | -0.525681 | -1.316882 | 2.105523  |
| H | -1.228742 | 0.291815  | 2.140803  |
| C | -1.878367 | -0.871311 | 0.484912  |
| H | -2.662306 | -1.436546 | 0.996146  |
| C | -2.575126 | 0.322579  | -0.183174 |
| N | -1.301410 | -1.797108 | -0.578483 |
| H | -0.352143 | -1.468482 | -0.825214 |
| H | -1.882151 | -1.783350 | -1.424457 |
| O | -2.903394 | 1.298521  | 0.417531  |
| O | -2.804308 | 0.088690  | -1.494115 |
| H | -3.289938 | 0.835033  | -1.884387 |
| F | 3.656104  | -1.121775 | -0.417047 |
| H | -1.219762 | -2.758745 | -0.239066 |

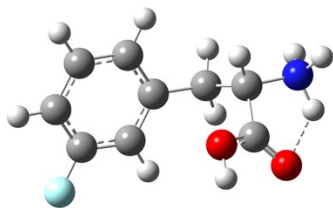

Isomer 9, 20.4kJ/mol

|   |           |           |           |
|---|-----------|-----------|-----------|
| C | 0.505105  | -0.704620 | -0.448320 |
| C | 1.228690  | 0.431498  | -0.816932 |
| C | 2.519325  | 0.589405  | -0.331851 |
| C | 3.118868  | -0.340995 | 0.502748  |
| C | 2.391411  | -1.474744 | 0.857534  |
| C | 1.093597  | -1.660148 | 0.385838  |
| H | 0.819562  | 1.185365  | -1.479921 |
| H | 4.130862  | -0.178625 | 0.851365  |
| H | 2.844996  | -2.221482 | 1.497770  |
| H | 0.552703  | -2.561118 | 0.657078  |
| C | -0.906457 | -0.899074 | -0.960604 |
| H | -1.033216 | -1.935938 | -1.293773 |
| H | -1.086435 | -0.250911 | -1.824248 |
| C | -1.997058 | -0.623446 | 0.104088  |
| H | -1.873185 | -1.272975 | 0.969945  |
| C | -2.076500 | 0.849533  | 0.526759  |
| N | -3.366188 | -0.896260 | -0.508893 |
| H | -3.322325 | -1.595050 | -1.254966 |
| H | -4.050426 | -1.208038 | 0.185766  |
| O | -1.204177 | 1.152545  | 1.466849  |
| O | -2.870564 | 1.598356  | 0.006585  |
| H | -3.699529 | 0.010624  | -0.887005 |
| F | 3.207487  | 1.687546  | -0.692978 |
| H | -1.251040 | 2.102383  | 1.674004  |

### 3-F-Phe·H<sup>+</sup>: The comparison between experimental IRMPD and calculated IR spectra

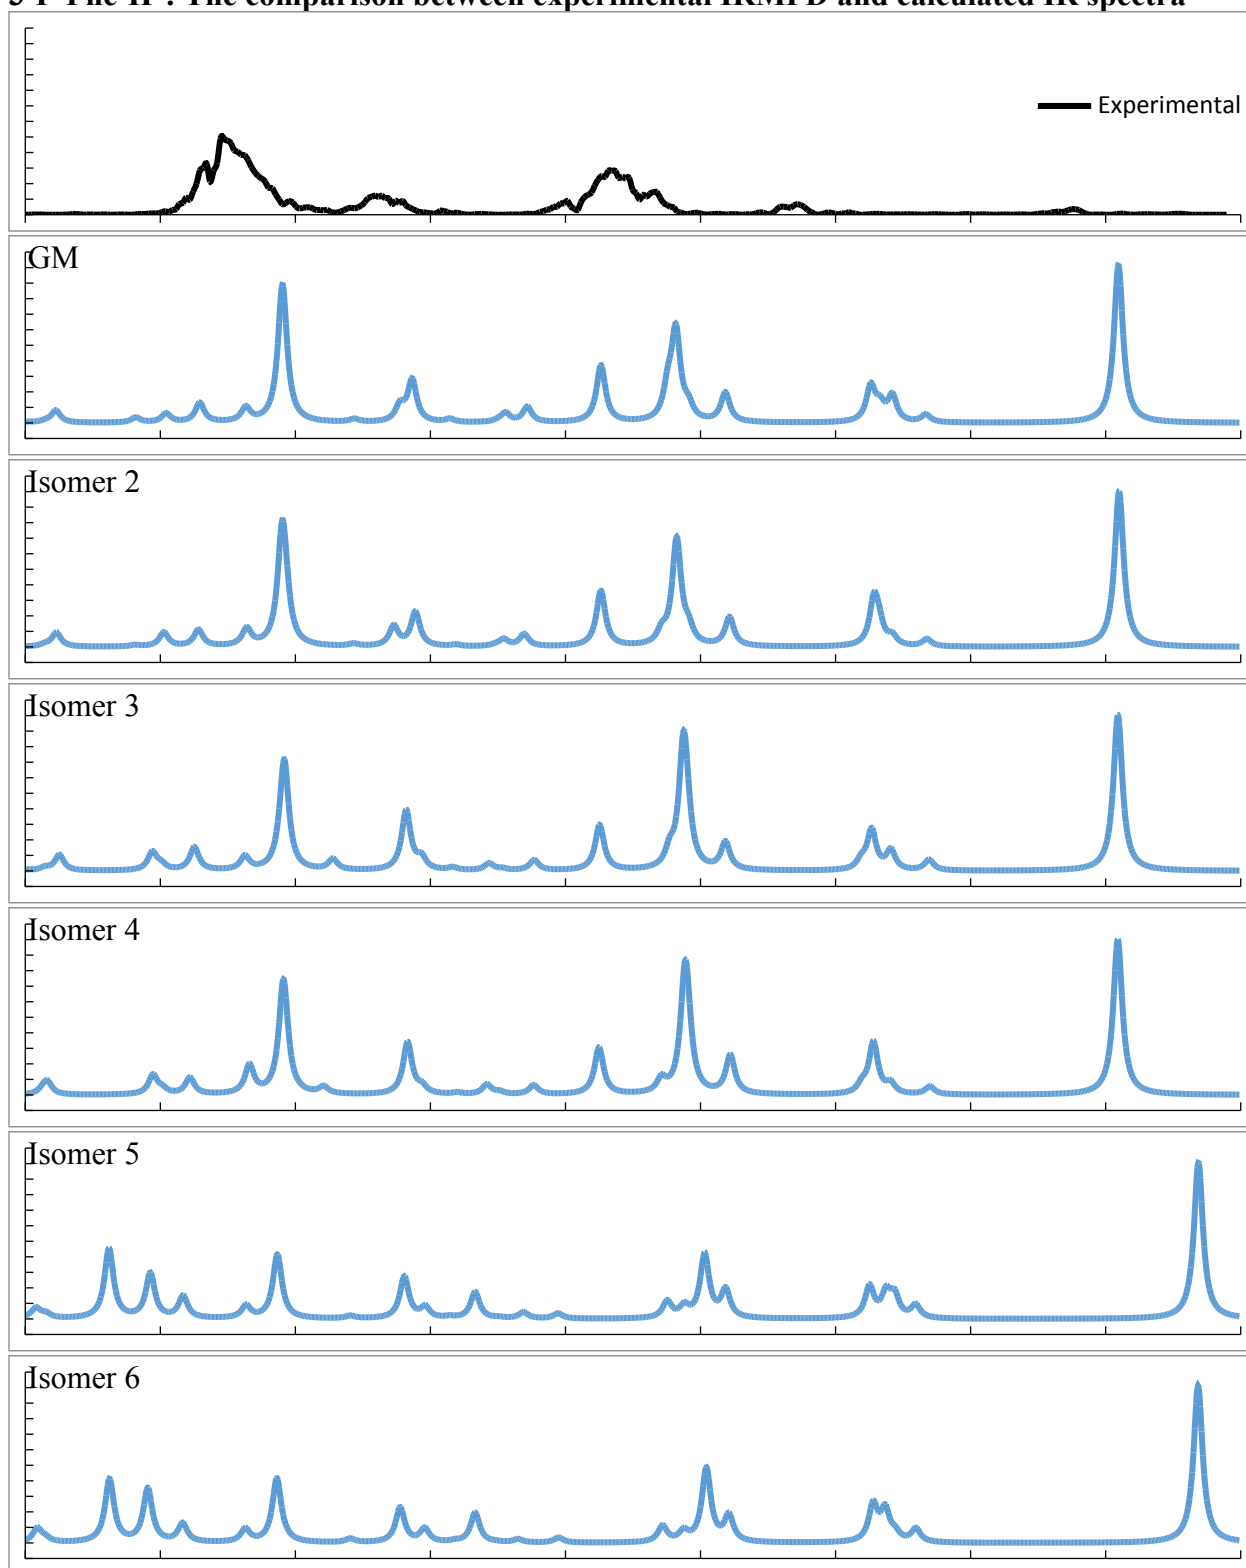

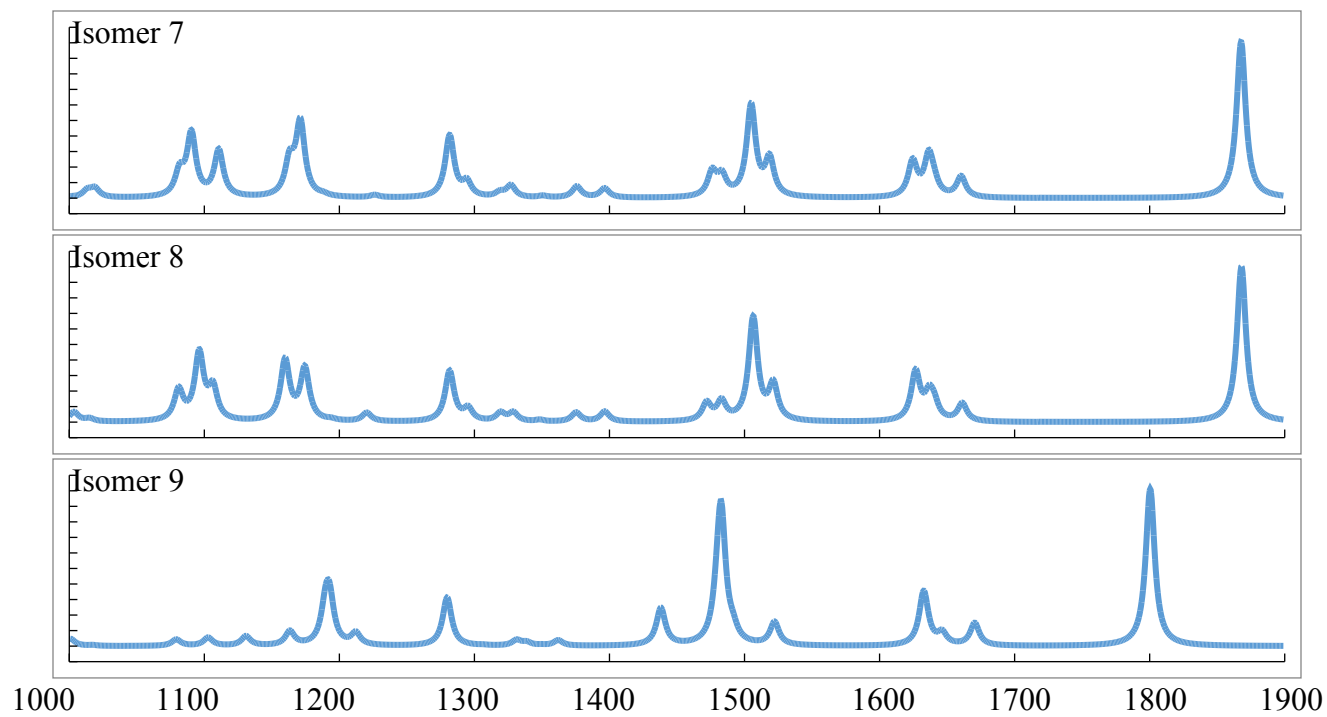

**4-F-Phe•H<sup>+</sup>**

| 4-F-Phe Isomer | Gibbs (hartree) | Relative energy (kJ/mol) |
|----------------|-----------------|--------------------------|
| Isomer 1       | -654.4356       | 0.00                     |
| Isomer 2       | -654.4342       | 3.64                     |
| Isomer 3       | -654.4304       | 13.52                    |
| Isomer 4       | -654.4293       | 16.64                    |
| Isomer 5       | -654.4281       | 19.54                    |
| Isomer 6       | -654.4221       | 35.47                    |
| Isomer 7       | -654.4213       | 37.45                    |
| Isomer 8       | -654.4210       | 38.43                    |
| Isomer 9       | -654.4123       | 61.13                    |
| Isomer 10      | -654.3993       | 95.32                    |
| Isomer 11      | -654.3905       | 118.31                   |
| Isomer 12      | -654.3900       | 119.82                   |
| Isomer 13      | -654.3869       | 127.74                   |
| Isomer 14      | -654.3858       | 130.73                   |
| Isomer 15      | -654.3838       | 135.91                   |
| Isomer 16      | -654.3829       | 138.21                   |

#### 4-F-Phe·H<sup>+</sup>: The XYZ atomic coordinates and structures

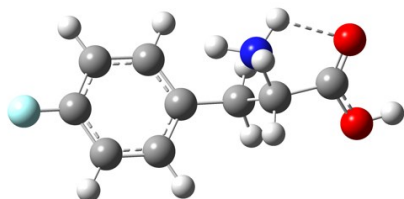

GM, 0.0kJ/mol

|   |           |           |           |
|---|-----------|-----------|-----------|
| C | 1.268331  | 1.293017  | 0.166314  |
| C | 0.578257  | 0.285685  | -0.524072 |
| C | 1.275546  | -0.869298 | -0.906978 |
| C | 2.628276  | -1.026370 | -0.603877 |
| C | 3.272255  | -0.011209 | 0.086597  |
| C | 2.616531  | 1.152508  | 0.473466  |
| H | 0.759020  | 2.209435  | 0.447068  |
| H | 0.777513  | -1.638536 | -1.490311 |
| H | 3.181118  | -1.905407 | -0.910238 |
| H | 3.164697  | 1.928908  | 0.992272  |
| C | -0.897607 | 0.424014  | -0.829100 |
| C | -1.777378 | 0.166650  | 0.422136  |
| C | -3.259198 | 0.033663  | 0.069669  |
| N | -1.396201 | -1.153930 | 1.058989  |
| O | -3.816610 | -1.036547 | 0.065080  |
| O | -3.789879 | 1.203601  | -0.249101 |
| H | -0.411073 | -1.372915 | 0.845376  |
| H | -2.029545 | -1.878052 | 0.680665  |
| H | -4.721062 | 1.089314  | -0.506658 |
| H | -1.188694 | -0.271967 | -1.621621 |
| H | -1.143299 | 1.427810  | -1.181799 |
| H | -1.623418 | 0.950618  | 1.163360  |
| H | -1.516518 | -1.145776 | 2.074530  |
| F | 4.571834  | -0.149368 | 0.382408  |

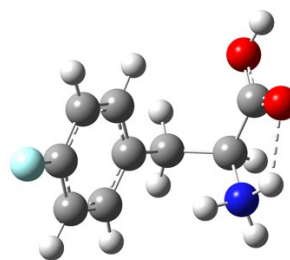

Isomer 2, 3.6kJ/mol

|           |           |           |
|-----------|-----------|-----------|
| 0.710125  | -0.948709 | -0.655330 |
| 0.366502  | 0.404929  | -0.785263 |
| 1.313615  | 1.375849  | -0.424173 |
| 2.566520  | 1.013377  | 0.069804  |
| 2.861188  | -0.335878 | 0.194219  |
| 1.955850  | -1.326517 | -0.167347 |
| 0.011827  | -1.719266 | -0.963207 |
| 1.098469  | 2.429930  | -0.577401 |
| 3.310474  | 1.754493  | 0.333395  |
| 2.237162  | -2.368052 | -0.075439 |
| -0.999584 | 0.825177  | -1.285021 |
| -2.085256 | 0.808500  | -0.180320 |
| -2.545900 | -0.577526 | 0.292491  |
| -1.591122 | 1.492158  | 1.078576  |
| -2.584109 | -0.869131 | 1.462743  |
| -2.916597 | -1.346495 | -0.719333 |
| -1.891224 | 2.465376  | 1.153586  |
| -1.944612 | 0.943347  | 1.883840  |
| -3.256631 | -2.193715 | -0.383501 |
| -1.354160 | 0.174250  | -2.086043 |
| -0.954595 | 1.835577  | -1.699619 |
| -2.975294 | 1.343518  | -0.520263 |
| -0.558041 | 1.455330  | 1.097827  |
| 4.062418  | -0.697343 | 0.665017  |

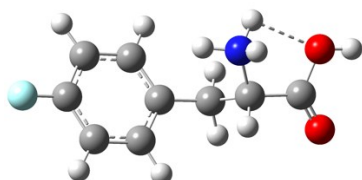

Isomer 3, 13.5kJ/mol

|   |          |           |           |
|---|----------|-----------|-----------|
| C | 1.272670 | 1.290736  | 0.116275  |
| C | 0.586197 | 0.257357  | -0.539070 |
| C | 1.286021 | -0.911354 | -0.872529 |

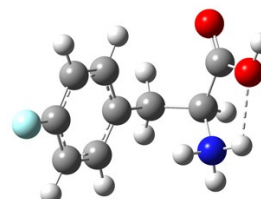

Isomer 4, 16.6kJ/mol

|          |           |           |
|----------|-----------|-----------|
| 0.737970 | -0.927370 | -0.723954 |
| 0.368962 | 0.425124  | -0.788631 |
| 1.284261 | 1.393181  | -0.345853 |



|   |           |           |           |           |           |           |
|---|-----------|-----------|-----------|-----------|-----------|-----------|
| C | 2.636605  | -1.056444 | -0.555411 | 2.528889  | 1.029570  | 0.167297  |
| C | 3.276689  | -0.015181 | 0.099339  | 2.848850  | -0.318573 | 0.226591  |
| C | 2.618839  | 1.162225  | 0.437562  | 1.977096  | -1.305100 | -0.217999 |
| H | 0.761993  | 2.217829  | 0.356694  | 0.064528  | -1.691671 | -1.094717 |
| H | 0.791367  | -1.703145 | -1.427824 | 1.053249  | 2.450034  | -0.450312 |
| H | 3.191447  | -1.946407 | -0.824306 | 3.248780  | 1.769718  | 0.493102  |
| H | 3.163689  | 1.958385  | 0.929179  | 2.278985  | -2.344224 | -0.177704 |
| C | -0.886720 | 0.391632  | -0.862440 | -0.988746 | 0.843508  | -1.316448 |
| C | -1.772524 | 0.195017  | 0.392300  | -2.101327 | 0.769849  | -0.248420 |
| C | -3.259127 | 0.259081  | 0.049681  | -2.520905 | -0.666354 | 0.094814  |
| N | -1.421082 | -1.131989 | 1.050128  | -1.659281 | 1.495312  | 1.015447  |
| O | -3.807305 | 1.276879  | -0.241225 | -2.671609 | -1.512171 | -0.731797 |
| O | -3.825668 | -0.969220 | 0.078747  | -2.740438 | -0.811705 | 1.420326  |
| H | -1.883035 | -1.905760 | 0.559932  | -0.654845 | 1.302419  | 1.168257  |
| H | -1.717763 | -1.171938 | 2.028527  | -1.774046 | 2.508210  | 0.930117  |
| H | -4.760010 | -0.906979 | -0.183439 | -3.053587 | -1.712755 | 1.608102  |
| H | -1.179269 | -0.330561 | -1.631013 | -1.313032 | 0.204421  | -2.139611 |
| H | -1.125493 | 1.383258  | -1.252752 | -0.948751 | 1.864836  | -1.705059 |
| H | -1.555078 | 0.970805  | 1.126745  | -3.004139 | 1.277261  | -0.599082 |
| H | -0.397614 | -1.260664 | 1.001449  | -2.185374 | 1.160265  | 1.830274  |
| F | 4.574359  | -0.142289 | 0.407944  | 4.043252  | -0.680855 | 0.715099  |

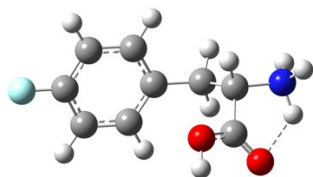

Isomer 5, 19.5kJ/mol

|   |           |           |           |
|---|-----------|-----------|-----------|
| C | -1.005030 | 0.369551  | 1.203056  |
| C | -0.408095 | -0.653887 | 0.460956  |
| C | -1.151906 | -1.293702 | -0.537169 |
| C | -2.461369 | -0.911493 | -0.805824 |
| C | -3.018559 | 0.115970  | -0.056096 |
| C | -2.316153 | 0.762500  | 0.950137  |
| H | -0.453324 | 0.861175  | 1.997710  |
| H | -0.720067 | -2.111132 | -1.106617 |
| H | -3.051671 | -1.400554 | -1.570182 |
| H | -2.794997 | 1.546671  | 1.522658  |
| C | 1.016656  | -1.075545 | 0.745099  |
| C | 2.035747  | -0.601858 | -0.322135 |
| C | 2.215988  | 0.920782  | -0.356965 |
| N | 3.420016  | -1.120777 | 0.051453  |
| O | 3.116347  | 1.450153  | 0.252403  |

|   |           |           |           |
|---|-----------|-----------|-----------|
| O | 1.299896  | 1.520872  | -1.090347 |
| H | 3.867813  | -0.372018 | 0.612744  |
| H | 3.372204  | -1.987286 | 0.593535  |
| H | 1.419378  | 2.485924  | -1.051458 |
| H | 1.077070  | -2.170060 | 0.784133  |
| H | 1.331911  | -0.695084 | 1.722162  |
| H | 1.779936  | -0.988137 | -1.308194 |
| H | 4.011395  | -1.284465 | -0.767898 |
| F | -4.283708 | 0.488700  | -0.307953 |

---

4-F-Phe·H<sup>+</sup>: The comparison between experimental IRMPD and calculated IR spectra

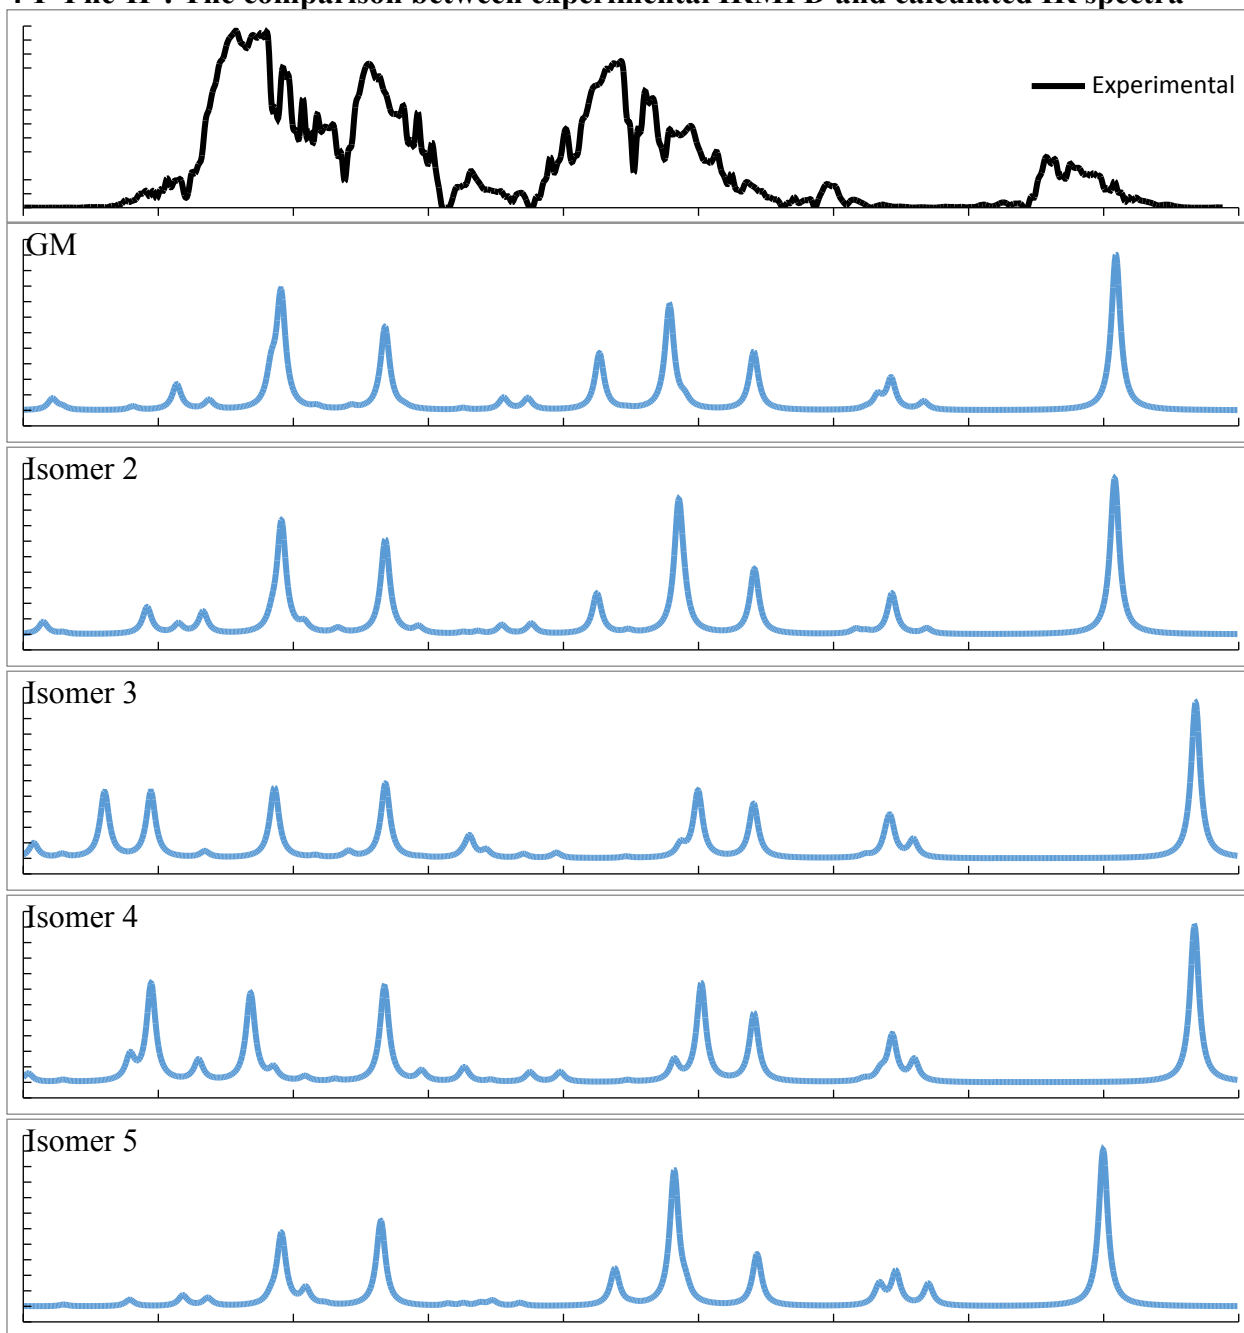

1000 1100 1200 1300 1400 1500 1600 1700 1800 1900

**2,5-F<sub>2</sub>-Phe•H<sup>+</sup>****Table S4 The Gibbs' Energies and Relative energies of 2,5-F<sub>2</sub>-Phe•H<sup>+</sup>**

| 2,5F <sub>2</sub> -Phe Isomer | Gibbs (hartree) | Relative energy (kJ/mol) |
|-------------------------------|-----------------|--------------------------|
| Isomer 1                      | -753.7125       | 0.00                     |
| Isomer 2                      | -753.7121       | 0.96                     |
| Isomer 3                      | -753.7080       | 11.66                    |
| Isomer 4                      | -753.7077       | 12.47                    |
| Isomer 5                      | -753.7048       | 20.09                    |
| Isomer 6                      | -753.7030       | 24.88                    |
| Isomer 7                      | -753.7022       | 26.98                    |
| Isomer 8                      | -753.6982       | 37.36                    |
| Isomer 9                      | -753.6977       | 38.77                    |
| Isomer 10                     | -753.6973       | 39.74                    |
| Isomer 11                     | -753.6849       | 72.36                    |
| Isomer 12                     | -753.6734       | 102.62                   |
| Isomer 13                     | -753.6724       | 105.16                   |
| Isomer 14                     | -753.6704       | 110.42                   |
| Isomer 15                     | -753.6701       | 111.16                   |
| Isomer 16                     | -753.6638       | 127.69                   |
| Isomer 17                     | -753.6615       | 133.81                   |
| Isomer 18                     | -753.6612       | 134.69                   |
| Isomer 19                     | -753.6597       | 138.49                   |
| Isomer 20                     | -753.6593       | 139.56                   |
| Isomer 21                     | -753.6587       | 141.26                   |

**2,5-F<sub>2</sub>-Phe·H<sup>+</sup>: The XYZ atomic coordinates and structures**

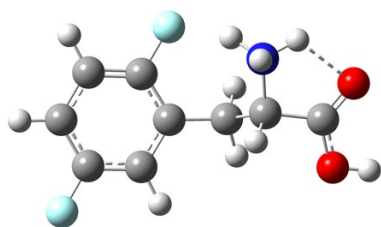

GM, 0.0kJ/mol

|   |           |           |           |
|---|-----------|-----------|-----------|
| C | -2.556510 | 1.457101  | -0.021589 |
| C | -1.229358 | 1.189150  | -0.293654 |
| C | -0.688670 | -0.089967 | -0.375600 |
| C | -1.563513 | -1.158659 | -0.152329 |
| C | -2.898326 | -0.904723 | 0.131307  |
| C | -3.414394 | 0.382508  | 0.197221  |
| H | -4.464491 | 0.534254  | 0.411053  |
| C | 0.764328  | -0.326658 | -0.734413 |
| H | 1.068967  | 0.316417  | -1.566553 |
| H | 0.882943  | -1.355654 | -1.075986 |
| C | 1.754368  | -0.141179 | 0.436973  |
| H | 1.420950  | -0.711732 | 1.304832  |
| N | 1.881308  | 1.315858  | 0.851259  |
| H | 2.824470  | 1.623841  | 0.547023  |
| H | 1.157132  | 1.903330  | 0.409743  |
| F | -0.371628 | 2.260365  | -0.492933 |
| F | -3.717367 | -1.946172 | 0.339155  |
| H | -2.909177 | 2.479928  | 0.013131  |
| H | -1.223018 | -2.185311 | -0.217100 |
| O | 4.085523  | 0.233791  | 0.001601  |
| C | 3.182881  | -0.564448 | 0.065332  |
| O | 3.261105  | -1.863172 | -0.172704 |
| H | 4.171529  | -2.104947 | -0.415973 |
| H | 1.824638  | 1.437427  | 1.864369  |

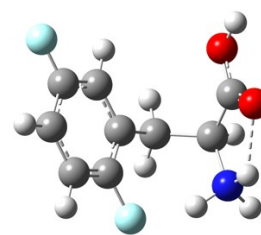

Isomer 2, 1.0kJ/mol

|   |           |           |           |
|---|-----------|-----------|-----------|
| C | -2.101130 | 1.486706  | -0.592284 |
| C | -0.885653 | 1.393900  | 0.055795  |
| C | -0.417173 | 0.245785  | 0.686558  |
| C | -1.250059 | -0.877823 | 0.643001  |
| C | -2.471400 | -0.802590 | -0.012038 |
| C | -2.916275 | 0.358481  | -0.628944 |
| H | -3.880170 | 0.375385  | -1.120937 |
| C | 0.898920  | 0.220272  | 1.439385  |
| H | 0.911979  | -0.641128 | 2.108508  |
| H | 0.995952  | 1.105087  | 2.075607  |
| C | 2.174241  | 0.109530  | 0.575458  |
| H | 3.037653  | -0.009974 | 1.233252  |
| N | 2.421567  | 1.345267  | -0.275661 |
| H | 3.260045  | 1.853158  | 0.010676  |
| H | 1.618288  | 1.992859  | -0.243048 |
| F | -0.070776 | 2.516472  | 0.080756  |
| F | -3.250222 | -1.894840 | -0.039140 |
| H | -2.402886 | 2.419068  | -1.051933 |
| H | -0.966461 | -1.802625 | 1.130313  |
| O | 2.339110  | -0.885241 | -1.603496 |
| C | 2.170931  | -1.057881 | -0.421532 |
| O | 1.985589  | -2.218696 | 0.185604  |
| H | 2.006803  | -2.940938 | -0.465774 |
| H | 2.544814  | 1.010762  | -1.250841 |

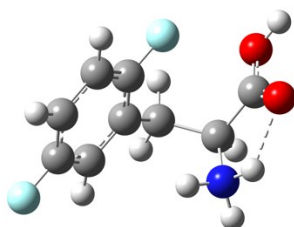

Isomer 3, 11.7kJ/mol

|   |           |           |           |
|---|-----------|-----------|-----------|
| C | -1.677109 | 1.751035  | 0.398509  |
| C | -0.559058 | 1.175632  | -0.181628 |
| C | -0.540017 | -0.132122 | -0.667202 |

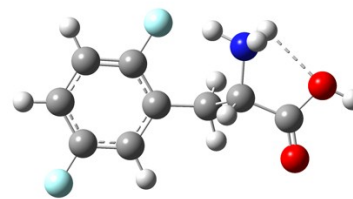

Isomer 4, 12.5kJ/mol

|   |           |           |           |
|---|-----------|-----------|-----------|
| C | -2.568700 | 1.460846  | 0.090558  |
| C | -1.246479 | 1.206807  | -0.214094 |
| C | -0.706714 | -0.064468 | -0.376562 |

|   |           |           |           |           |           |           |
|---|-----------|-----------|-----------|-----------|-----------|-----------|
| C | -1.719689 | -0.882262 | -0.541714 | -1.581761 | -1.142449 | -0.203111 |
| C | -2.839850 | -0.309394 | 0.047630  | -2.912990 | -0.904476 | 0.110299  |
| C | -2.840630 | 0.995652  | 0.518936  | -3.426457 | 0.376809  | 0.257004  |
| H | -3.737590 | 1.409393  | 0.961872  | -4.473154 | 0.517302  | 0.493792  |
| C | 0.693500  | -0.725240 | -1.312932 | 0.740330  | -0.300536 | -0.762496 |
| H | 1.155906  | -0.021680 | -2.007551 | 1.014782  | 0.295498  | -1.640377 |
| H | 0.405694  | -1.603439 | -1.894335 | 0.857810  | -1.345860 | -1.049804 |
| C | 1.794938  | -1.151226 | -0.306941 | 1.768894  | -0.055206 | 0.364249  |
| H | 2.470395  | -1.861739 | -0.787241 | 1.367462  | -0.410851 | 1.315220  |
| N | 1.201483  | -1.827782 | 0.913946  | 2.051383  | 1.432298  | 0.544187  |
| H | 1.350273  | -2.837949 | 0.931645  | 2.478009  | 1.630749  | 1.452640  |
| H | 1.657256  | -1.385331 | 1.738134  | 2.714679  | 1.754794  | -0.167631 |
| F | 0.574988  | 1.911267  | -0.294683 | -0.391696 | 2.293126  | -0.361778 |
| F | -3.956688 | -1.046594 | 0.150766  | -3.730336 | -1.955471 | 0.269128  |
| H | -1.633022 | 2.776124  | 0.744112  | -2.918041 | 2.480460  | 0.190703  |
| H | -1.792471 | -1.887438 | -0.942878 | -1.241541 | -2.163904 | -0.324849 |
| O | 2.751339  | 0.163123  | 1.456826  | 3.108437  | -2.000995 | -0.026202 |
| C | 2.659731  | -0.016922 | 0.266047  | 3.075708  | -0.816681 | 0.106776  |
| O | 3.286755  | 0.645434  | -0.686291 | 4.136650  | 0.017212  | 0.050306  |
| H | 3.822666  | 1.359894  | -0.301588 | 4.947000  | -0.494340 | -0.115794 |
| H | 0.190162  | -1.634775 | 0.966947  | 1.179912  | 1.977556  | 0.442079  |

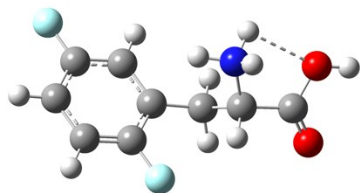

Isomer 5, 20.1kJ/mol

|   |           |           |           |
|---|-----------|-----------|-----------|
| C | 2.486652  | 1.463671  | 0.415525  |
| C | 1.165468  | 1.298207  | 0.036205  |
| C | 0.658731  | 0.094212  | -0.457490 |
| C | 1.544995  | -0.987550 | -0.554052 |
| C | 2.869925  | -0.824461 | -0.170183 |
| C | 3.358079  | 0.382189  | 0.310944  |
| H | 4.400352  | 0.469980  | 0.589989  |
| C | -0.785808 | -0.025460 | -0.890433 |
| H | -0.945751 | -0.985322 | -1.389721 |
| H | -1.050126 | 0.755150  | -1.607664 |
| C | -1.776498 | 0.127005  | 0.285098  |
| H | -1.686190 | 1.125147  | 0.714552  |
| N | -1.413885 | -0.854980 | 1.393310  |
| H | -0.390940 | -0.869475 | 1.508964  |

|   |           |           |           |
|---|-----------|-----------|-----------|
| H | -1.845665 | -0.602015 | 2.286143  |
| F | 0.311426  | 2.349315  | 0.141161  |
| F | 3.701092  | -1.873089 | -0.276749 |
| H | 2.824189  | 2.426949  | 0.776698  |
| H | 1.227275  | -1.940523 | -0.962060 |
| O | -3.766420 | 0.668098  | -0.922809 |
| C | -3.220896 | -0.076684 | -0.169653 |
| O | -3.752590 | -1.201597 | 0.362433  |
| H | -4.661340 | -1.320469 | 0.037040  |
| H | -1.739079 | -1.799377 | 1.160430  |

---

**2,5-F<sub>2</sub>-Phe·H<sup>+</sup>: The comparison between experimental IRMPD and calculated IR spectra**

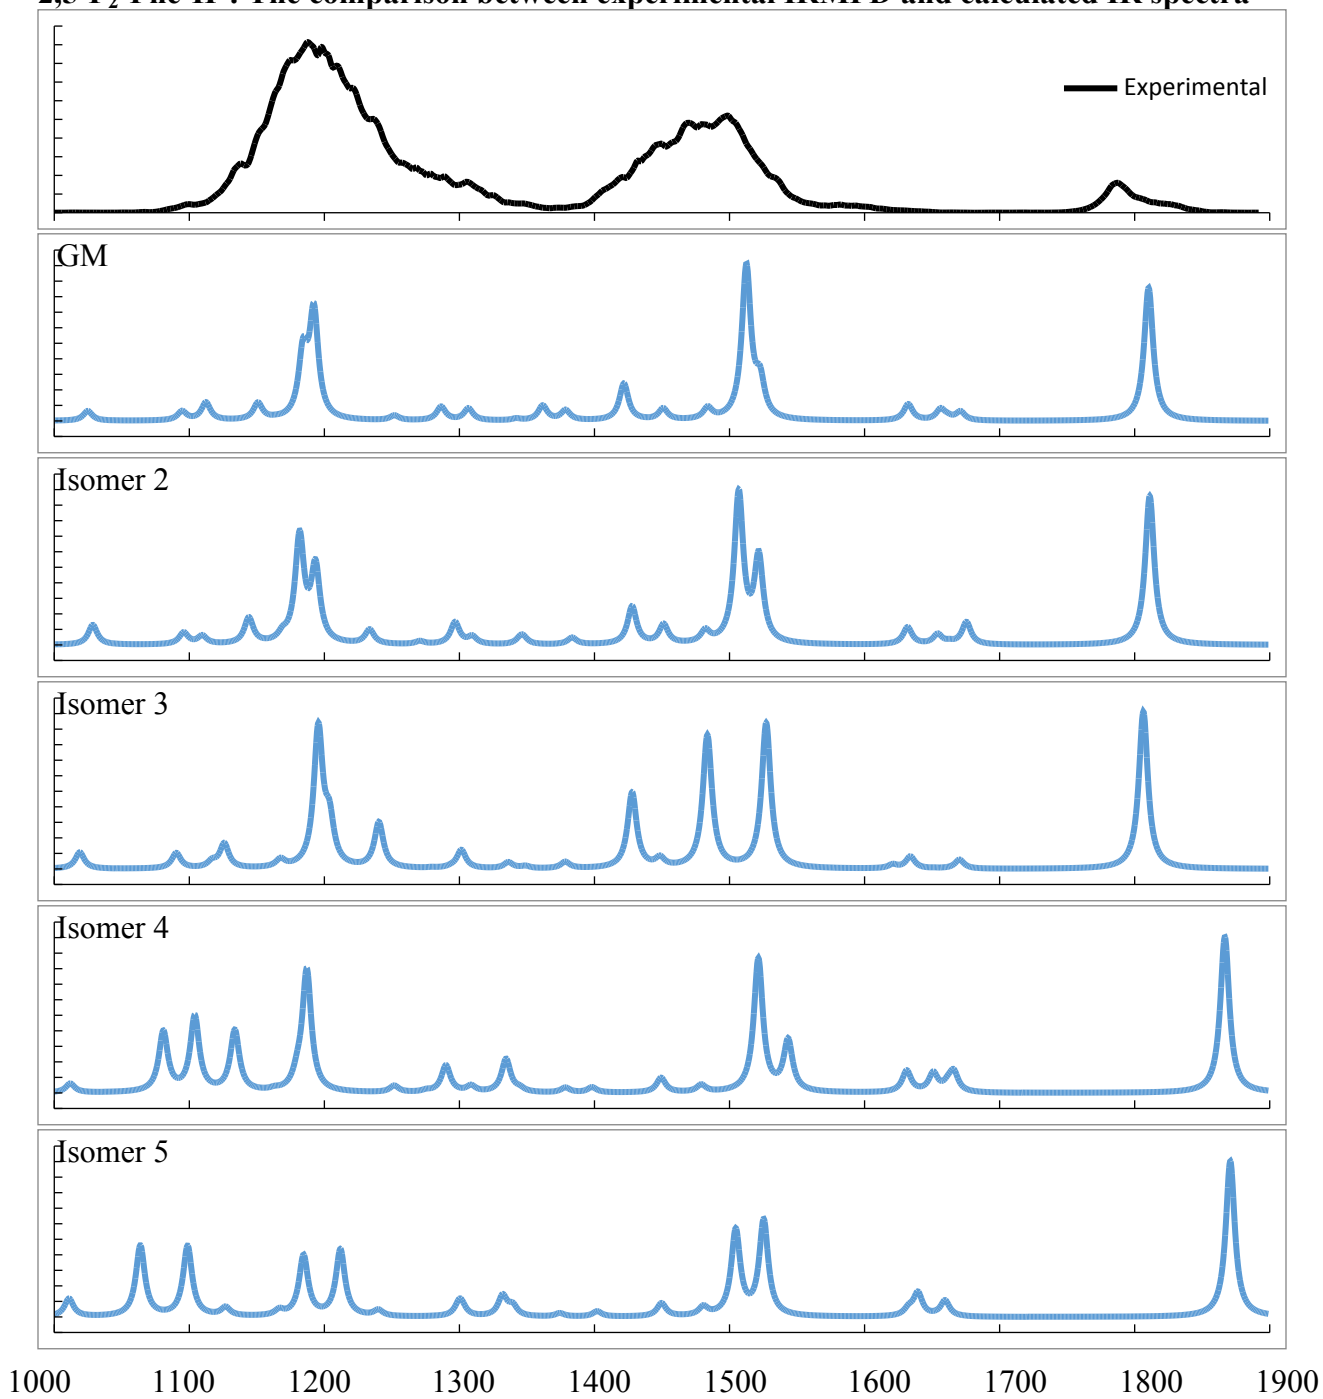



**3,5-F<sub>2</sub>-Phe•H<sup>+</sup>****Table S5 The Gibbs' Energies and Relative energies of 3,5-F<sub>2</sub>-Phe•H<sup>+</sup>**

| 3,5F <sub>2</sub> -Phe Isomer | Gibbs (hartree) | Relative energy (kJ/mol) |
|-------------------------------|-----------------|--------------------------|
| Isomer 1                      | -753.7084       | 0.00                     |
| Isomer 2                      | -753.7072       | 3.30                     |
| Isomer 3                      | -753.7032       | 13.61                    |
| Isomer 4                      | -753.7023       | 16.18                    |
| Isomer 5                      | -753.7015       | 18.16                    |
| Isomer 6                      | -753.6952       | 34.73                    |
| Isomer 7                      | -753.6946       | 36.23                    |
| Isomer 8                      | -753.6934       | 39.49                    |
| Isomer 9                      | -753.6933       | 39.69                    |

### 3,5-F<sub>2</sub>-Phe·H<sup>+</sup>: The XYZ atomic coordinates and structures

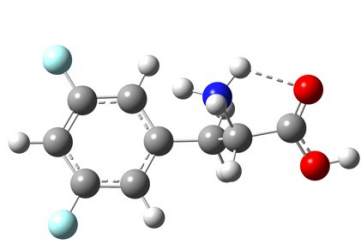

GM, 0.0kJ/mol

|   |           |           |           |
|---|-----------|-----------|-----------|
| C | 0.442806  | 0.131170  | -0.564933 |
| C | 1.110927  | -1.100771 | -0.567738 |
| C | 2.455301  | -1.138344 | -0.202047 |
| C | 3.159645  | -0.006390 | 0.170936  |
| C | 2.465424  | 1.196760  | 0.161867  |
| C | 1.125493  | 1.292914  | -0.191461 |
| H | 0.637493  | -2.012445 | -0.915916 |
| H | 4.206182  | -0.053145 | 0.441988  |
| H | 0.651536  | 2.267356  | -0.198376 |
| C | -1.029694 | 0.184865  | -0.912410 |
| H | -1.264916 | 1.066496  | -1.511614 |
| H | -1.313458 | -0.690453 | -1.503928 |
| C | -1.918146 | 0.257727  | 0.354923  |
| H | -1.752302 | 1.197366  | 0.881671  |
| C | -3.402435 | 0.073191  | 0.029118  |
| N | -1.574517 | -0.872876 | 1.304162  |
| H | -2.240782 | -1.643348 | 1.123506  |
| H | -0.601703 | -1.182190 | 1.155210  |
| O | -3.986820 | -0.947678 | 0.296681  |
| O | -3.898977 | 1.133259  | -0.587119 |
| H | -4.832668 | 0.982254  | -0.815580 |
| F | 3.087683  | -2.318488 | -0.220658 |
| H | -1.682693 | -0.602007 | 2.284570  |
| F | 3.117360  | 2.312808  | 0.507693  |

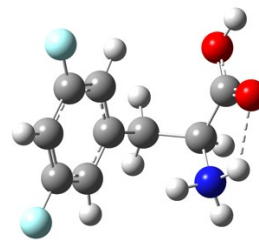

Isomer 2, 3.3kJ/mol

|           |           |           |
|-----------|-----------|-----------|
| 0.281371  | -0.278307 | 0.819315  |
| 1.253585  | -1.234190 | 0.488993  |
| 2.446259  | -0.811243 | -0.093831 |
| 2.713791  | 0.519808  | -0.365206 |
| 1.732211  | 1.439159  | -0.020257 |
| 0.523891  | 1.073725  | 0.560531  |
| 1.142638  | -2.281969 | 0.747868  |
| 3.650224  | 0.831443  | -0.808849 |
| -0.186322 | 1.845831  | 0.828478  |
| -1.038893 | -0.730778 | 1.407386  |
| -0.909767 | -1.673430 | 1.945220  |
| -1.424253 | -0.007161 | 2.127328  |
| -2.139139 | -0.929827 | 0.338091  |
| -2.997157 | -1.442602 | 0.779555  |
| -2.670830 | 0.348131  | -0.329284 |
| -1.643091 | -1.779226 | -0.815595 |
| -0.613234 | -1.710814 | -0.876760 |
| -2.041089 | -1.373542 | -1.683234 |
| -2.754303 | 0.447436  | -1.528550 |
| -3.044030 | 1.251940  | 0.562217  |
| -3.427007 | 2.024440  | 0.111409  |
| 3.370945  | -1.732835 | -0.392928 |
| -1.904884 | -2.763084 | -0.733064 |
| 1.960798  | 2.736344  | -0.255133 |

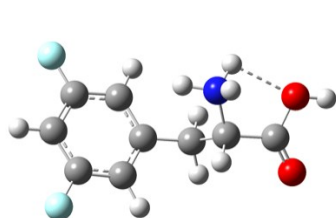

Isomer 3, 13.6kJ/mol

|   |          |           |           |
|---|----------|-----------|-----------|
| C | 0.451478 | 0.125127  | -0.568645 |
| C | 1.119201 | -1.107092 | -0.559216 |
| C | 2.460916 | -1.143440 | -0.184633 |

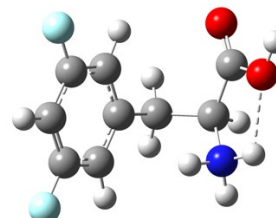

Isomer 4, 16.2kJ/mol

|          |           |           |
|----------|-----------|-----------|
| 0.286127 | -0.276682 | 0.829140  |
| 1.230616 | -1.247843 | 0.462879  |
| 2.419331 | -0.842060 | -0.138878 |

|   |           |           |           |           |           |           |
|---|-----------|-----------|-----------|-----------|-----------|-----------|
| C | 3.163758  | -0.009787 | 0.185932  | 2.709961  | 0.486999  | -0.395597 |
| C | 2.470443  | 1.193786  | 0.165480  | 1.755513  | 1.421517  | -0.016315 |
| C | 1.132947  | 1.288645  | -0.197464 | 0.551582  | 1.074656  | 0.585131  |
| H | 0.647803  | -2.020867 | -0.904451 | 1.103321  | -2.297001 | 0.708172  |
| H | 4.208504  | -0.055637 | 0.463987  | 3.643767  | 0.785551  | -0.853559 |
| H | 0.659485  | 2.263269  | -0.214378 | -0.139362 | 1.855699  | 0.876289  |
| C | -1.018012 | 0.183867  | -0.929670 | -1.028108 | -0.708831 | 1.448784  |
| H | -1.247968 | 1.072302  | -1.521040 | -0.904652 | -1.653797 | 1.984388  |
| H | -1.302225 | -0.684046 | -1.532371 | -1.385780 | 0.024499  | 2.173272  |
| C | -1.912699 | 0.256604  | 0.330220  | -2.155146 | -0.874102 | 0.407584  |
| H | -1.680495 | 1.157374  | 0.899088  | -3.021429 | -1.362199 | 0.862105  |
| C | -3.396324 | 0.289758  | -0.037125 | -2.660272 | 0.463181  | -0.154237 |
| N | -1.603975 | -0.922141 | 1.244331  | -1.698256 | -1.777990 | -0.730806 |
| H | -1.901043 | -0.751010 | 2.208629  | -0.704406 | -1.580352 | -0.937644 |
| H | -2.096414 | -1.762190 | 0.920784  | -2.249766 | -1.597736 | -1.577637 |
| O | -3.905433 | 1.234831  | -0.554680 | -2.851179 | 1.419490  | 0.531242  |
| O | -4.005169 | -0.879640 | 0.262575  | -2.899040 | 0.380671  | -1.480855 |
| H | -4.937215 | -0.847187 | -0.013398 | -3.263179 | 1.221346  | -1.806862 |
| F | 3.092198  | -2.324787 | -0.191403 | 3.317253  | -1.779261 | -0.472358 |
| H | -0.586716 | -1.099955 | 1.232632  | -1.773895 | -2.767668 | -0.482505 |
| F | 3.120989  | 2.311076  | 0.508933  | 2.008002  | 2.716514  | -0.239244 |

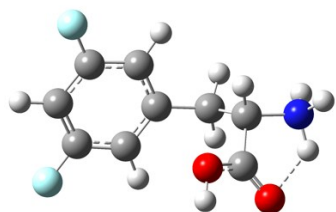

Isomer 5, 18.2kJ/mol

|   |           |           |           |
|---|-----------|-----------|-----------|
| C | 0.301145  | -0.299655 | -0.705094 |
| C | 1.037881  | -1.351845 | -0.154249 |
| C | 2.327294  | -1.100558 | 0.293004  |
| C | 2.919954  | 0.151007  | 0.211144  |
| C | 2.161953  | 1.166970  | -0.348487 |
| C | 0.865618  | 0.972298  | -0.809763 |
| H | 0.646778  | -2.359967 | -0.081551 |
| H | 3.929923  | 0.322880  | 0.558919  |
| H | 0.332445  | 1.805871  | -1.250595 |
| C | -1.109897 | -0.543188 | -1.198421 |
| H | -1.429755 | 0.283663  | -1.839977 |
| H | -1.130046 | -1.457319 | -1.803371 |
| C | -2.143597 | -0.721132 | -0.059028 |
| H | -1.872190 | -1.551741 | 0.591729  |

|   |           |           |           |
|---|-----------|-----------|-----------|
| C | -2.379258 | 0.559867  | 0.753618  |
| N | -3.508386 | -1.017014 | -0.669499 |
| H | -3.987365 | -0.101429 | -0.765778 |
| H | -3.434143 | -1.474420 | -1.581781 |
| O | -3.306387 | 1.291397  | 0.496043  |
| O | -1.475597 | 0.730670  | 1.697345  |
| H | -1.629963 | 1.572065  | 2.161821  |
| F | 3.031823  | -2.113522 | 0.820216  |
| H | -4.088412 | -1.602488 | -0.062034 |
| F | 2.700482  | 2.391618  | -0.451808 |

---

### 3,5-F<sub>2</sub>-Phe·H<sup>+</sup>: The comparison between experimental IRMPD and calculated IR spectra

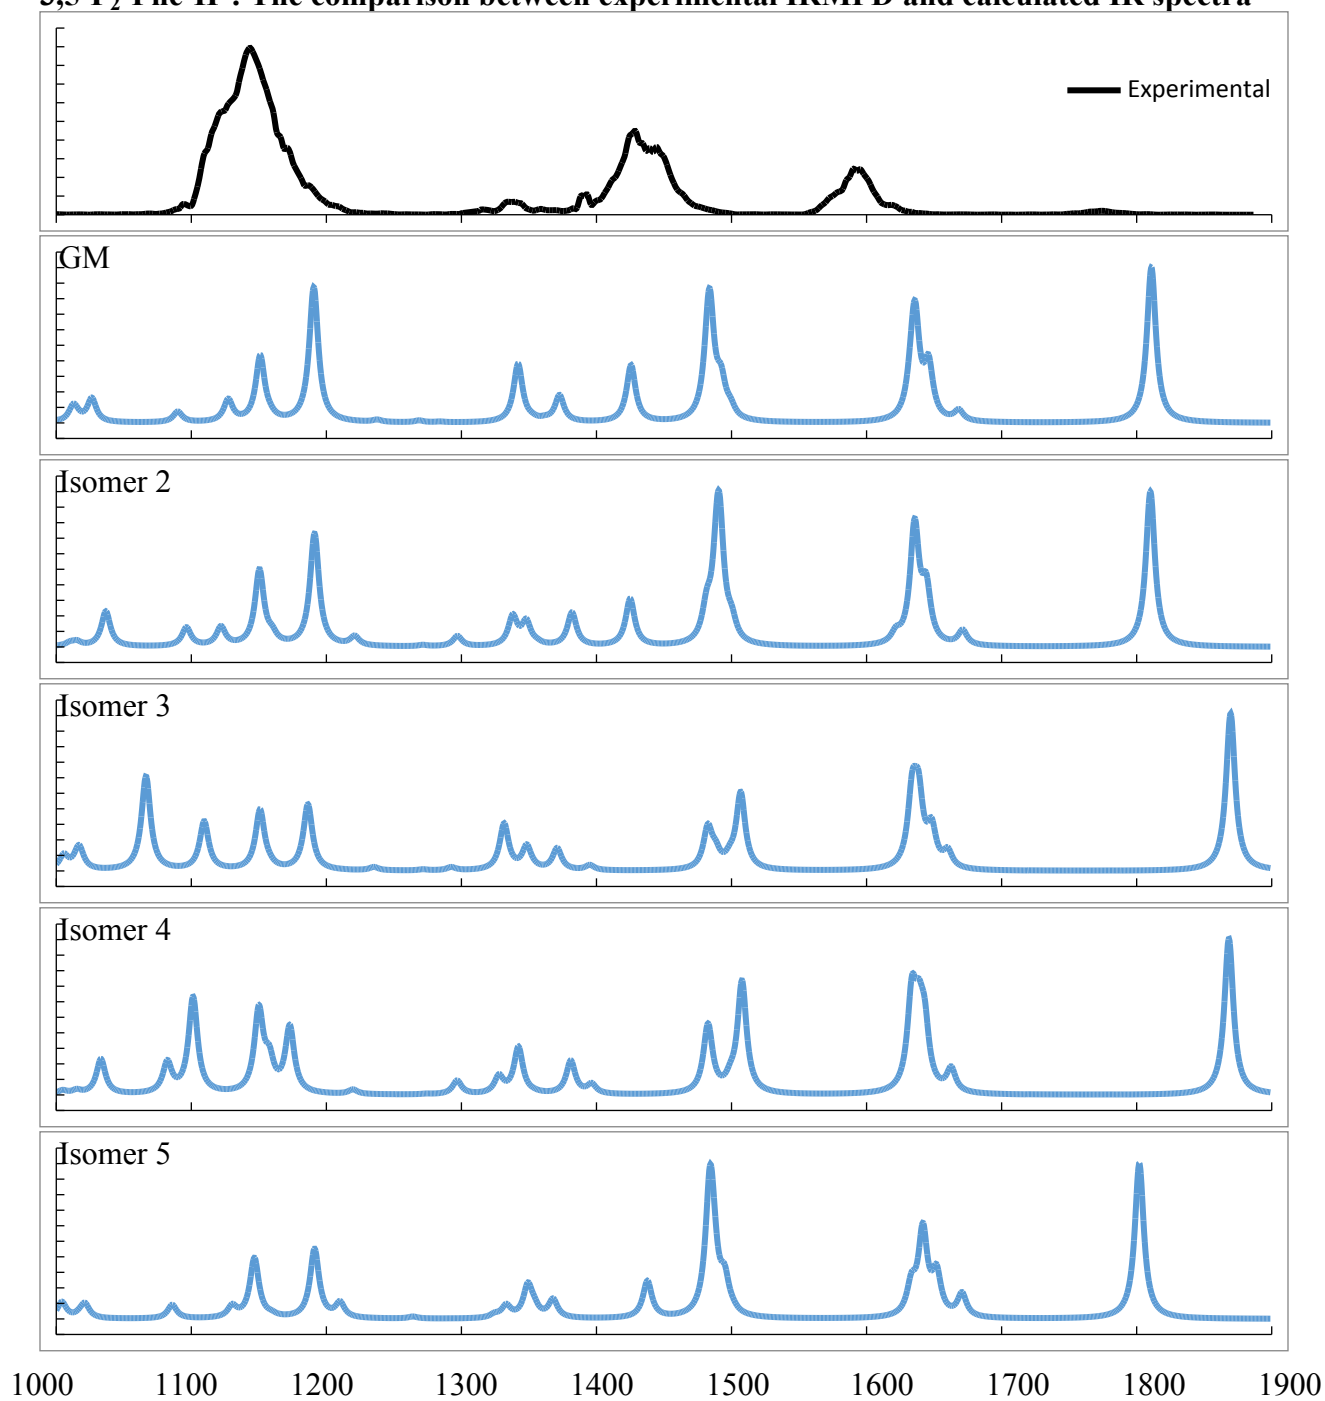

**F<sub>5</sub>-Phe•H<sup>+</sup>****Table S6 The Gibbs' Energies and Relative energies of F<sub>5</sub>-Phe•H<sup>+</sup>**

| F <sub>5</sub> -Phe Isomer | Gibbs (hartree) | Relative energy (kJ/mol) |
|----------------------------|-----------------|--------------------------|
| Isomer 1                   | -1051.5014      | 0.00                     |
| Isomer 2                   | -1051.5008      | 1.52                     |
| Isomer 3                   | -1051.4970      | 11.40                    |
| Isomer 4                   | -1051.4955      | 15.45                    |
| Isomer 5                   | -1051.4942      | 18.91                    |
| Isomer 6                   | -1051.4916      | 25.72                    |
| Isomer 7                   | -1051.4876      | 36.22                    |
| Isomer 8                   | -1051.4875      | 36.39                    |
| Isomer 9                   | -1051.4741      | 71.61                    |
| Isomer 10                  | -1051.4606      | 107.00                   |
| Isomer 11                  | -1051.4584      | 112.68                   |
| Isomer 12                  | -1051.4549      | 122.02                   |
| Isomer 13                  | -1051.4546      | 122.88                   |
| Isomer 14                  | -1051.4538      | 124.99                   |
| Isomer 15                  | -1051.4535      | 125.72                   |
| Isomer 16                  | -1051.4533      | 126.28                   |
| Isomer 17                  | -1051.4527      | 127.74                   |

**F<sub>5</sub>-Phe·H<sup>+</sup>: The XYZ atomic coordinates and structures**

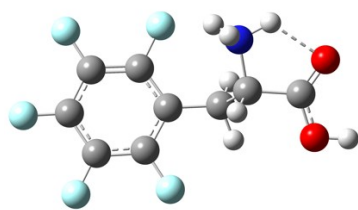

GM, 0.0kJ/mol

|   |           |           |           |
|---|-----------|-----------|-----------|
| C | 0.114314  | 0.143849  | -0.378838 |
| C | 0.883675  | 1.282326  | -0.136403 |
| C | 2.252094  | 1.211321  | 0.104018  |
| C | 2.885594  | -0.029379 | 0.111712  |
| C | 2.146783  | -1.189531 | -0.116840 |
| C | 0.786272  | -1.074887 | -0.353051 |
| C | -1.356563 | 0.247040  | -0.719133 |
| H | -1.569319 | 1.259375  | -1.063370 |
| H | -1.601881 | -0.426820 | -1.545643 |
| C | -2.312634 | -0.021644 | 0.462466  |
| H | -2.038501 | 0.594884  | 1.319600  |
| C | -3.782756 | 0.245121  | 0.097681  |
| N | -2.290165 | -1.478503 | 0.902451  |
| H | -3.227289 | -1.862074 | 0.664830  |
| H | -2.153599 | -1.580031 | 1.910439  |
| O | -4.601627 | -0.641340 | 0.092463  |
| O | -3.988528 | 1.515315  | -0.197377 |
| H | -4.922360 | 1.662781  | -0.428202 |
| F | 2.952541  | 2.313964  | 0.325334  |
| F | 0.296097  | 2.484814  | -0.145835 |
| F | 0.067052  | -2.217383 | -0.558784 |
| F | 2.736468  | -2.377767 | -0.098542 |
| F | 4.183895  | -0.109835 | 0.346031  |
| H | -1.559821 | -2.019835 | 0.421008  |

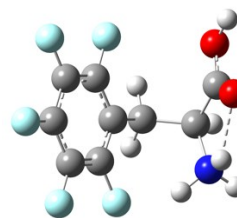

Isomer 2, 1.5kJ/mol

|           |           |           |
|-----------|-----------|-----------|
| -0.091575 | 0.121049  | -0.741027 |
| 0.465615  | -1.141865 | -0.538126 |
| 1.754949  | -1.310976 | -0.043865 |
| 2.525633  | -0.193114 | 0.265945  |
| 2.001185  | 1.085393  | 0.080795  |
| 0.713367  | 1.209657  | -0.414486 |
| -1.460133 | 0.299382  | -1.366036 |
| -1.426555 | 1.099366  | -2.110210 |
| -1.735086 | -0.611563 | -1.899248 |
| -2.622586 | 0.596234  | -0.391103 |
| -3.541248 | 0.714339  | -0.967366 |
| -2.829777 | -0.492380 | 0.672233  |
| -2.403306 | 1.873912  | 0.404972  |
| -3.225172 | 2.481871  | 0.391995  |
| -2.240992 | 1.576930  | 1.387633  |
| -2.621903 | -0.278556 | 1.841874  |
| -3.239540 | -1.623590 | 0.130986  |
| -3.337935 | -2.311714 | 0.811805  |
| 2.250235  | -2.527238 | 0.133511  |
| -0.250391 | -2.233150 | -0.837711 |
| 0.205093  | 2.466164  | -0.581191 |
| 2.720923  | 2.158215  | 0.381493  |
| 3.749000  | -0.341746 | 0.742959  |
| -1.592133 | 2.410065  | 0.070195  |

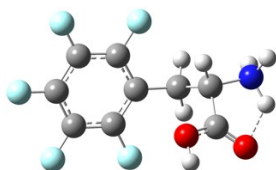

Isomer 3, 11.4kJ/mol

|   |           |           |           |
|---|-----------|-----------|-----------|
| C | 0.014312  | 0.214514  | -0.642429 |
| C | -0.596236 | -1.036952 | -0.639601 |
| C | -1.915862 | -1.208693 | -0.240840 |
| C | -2.653894 | -0.102617 | 0.174499  |
| C | -2.069324 | 1.162829  | 0.189493  |

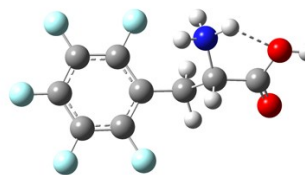

Isomer 4, 15.4kJ/mol

|          |           |           |
|----------|-----------|-----------|
| 0.120166 | 0.188809  | -0.399047 |
| 0.918711 | 1.296276  | -0.110879 |
| 2.280938 | 1.176507  | 0.143391  |
| 2.876624 | -0.083130 | 0.117447  |
| 2.107388 | -1.213032 | -0.156820 |

|   |           |           |           |           |           |           |
|---|-----------|-----------|-----------|-----------|-----------|-----------|
| C | -0.750555 | 1.298685  | -0.217883 | 0.752196  | -1.053386 | -0.405378 |
| C | 1.430907  | 0.411466  | -1.119366 | -1.339851 | 0.334378  | -0.763894 |
| H | 1.751440  | -0.460546 | -1.694046 | -1.529563 | 1.337557  | -1.146384 |
| H | 1.453846  | 1.281100  | -1.784463 | -1.594713 | -0.359654 | -1.569824 |
| C | 2.438065  | 0.678236  | 0.028668  | -2.312483 | 0.133756  | 0.408673  |
| H | 2.082576  | 1.485841  | 0.667981  | -2.104316 | 0.850409  | 1.208113  |
| C | 2.770223  | -0.571548 | 0.857995  | -3.773513 | 0.348596  | -0.015783 |
| N | 3.781376  | 1.094345  | -0.555007 | -2.148123 | -1.246147 | 1.042047  |
| H | 4.222748  | 1.843010  | -0.014389 | -2.976303 | -1.478348 | 1.602534  |
| H | 3.707763  | 1.405077  | -1.527146 | -1.315098 | -1.279283 | 1.636691  |
| O | 3.831524  | -1.134955 | 0.733894  | -4.106514 | 1.209087  | -0.768632 |
| O | 1.781205  | -0.918347 | 1.658570  | -4.592198 | -0.530294 | 0.602654  |
| H | 2.011734  | -1.731535 | 2.141985  | -5.517064 | -0.353727 | 0.358495  |
| F | -2.470622 | -2.414861 | -0.247163 | 3.011742  | 2.248963  | 0.410139  |
| F | 0.108011  | -2.112849 | -1.024903 | 0.364586  | 2.513769  | -0.087498 |
| F | -0.181040 | 2.520281  | -0.200363 | 0.003703  | -2.160110 | -0.659823 |
| F | -2.768556 | 2.218057  | 0.589113  | 2.663693  | -2.417762 | -0.170971 |
| F | -3.910217 | -0.253790 | 0.561539  | 4.168892  | -0.209783 | 0.364973  |
| H | 4.394415  | 0.256000  | -0.491826 | -2.030980 | -1.972612 | 0.326238  |

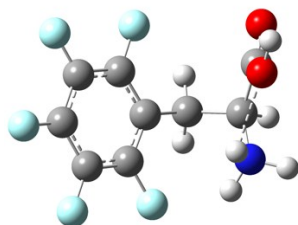

Isomer 5, 18.9kJ/mol

|   |           |           |           |
|---|-----------|-----------|-----------|
| C | -0.073954 | 0.152463  | -0.726360 |
| C | 0.432062  | -1.132821 | -0.527754 |
| C | 1.718628  | -1.352046 | -0.045571 |
| C | 2.535734  | -0.264726 | 0.255934  |
| C | 2.061656  | 1.033990  | 0.075532  |
| C | 0.774729  | 1.211483  | -0.408124 |
| C | -1.432881 | 0.394907  | -1.347838 |
| H | -1.366665 | 1.221448  | -2.059699 |
| H | -1.743880 | -0.484747 | -1.913611 |
| C | -2.585142 | 0.696489  | -0.363246 |
| H | -3.457382 | 1.017147  | -0.934822 |
| C | -3.003447 | -0.533948 | 0.450983  |
| N | -2.226570 | 1.851066  | 0.569704  |
| H | -1.660553 | 1.501988  | 1.351787  |
| H | -1.683758 | 2.572858  | 0.080411  |
| O | -3.534021 | -1.474697 | -0.050015 |



|   |           |           |           |
|---|-----------|-----------|-----------|
| O | -2.678605 | -0.398827 | 1.755774  |
| H | -2.938621 | -1.198372 | 2.245081  |
| F | 2.168013  | -2.586181 | 0.129599  |
| F | -0.331107 | -2.191016 | -0.819134 |
| F | 0.316221  | 2.483143  | -0.575830 |
| F | 2.827834  | 2.076682  | 0.369349  |
| F | 3.756401  | -0.461995 | 0.722638  |
| H | -3.062704 | 2.279976  | 0.975928  |

---

**F<sub>5</sub>-Phe·H<sup>+</sup>: The comparison between experimental IRMPD and calculated IR spectra**

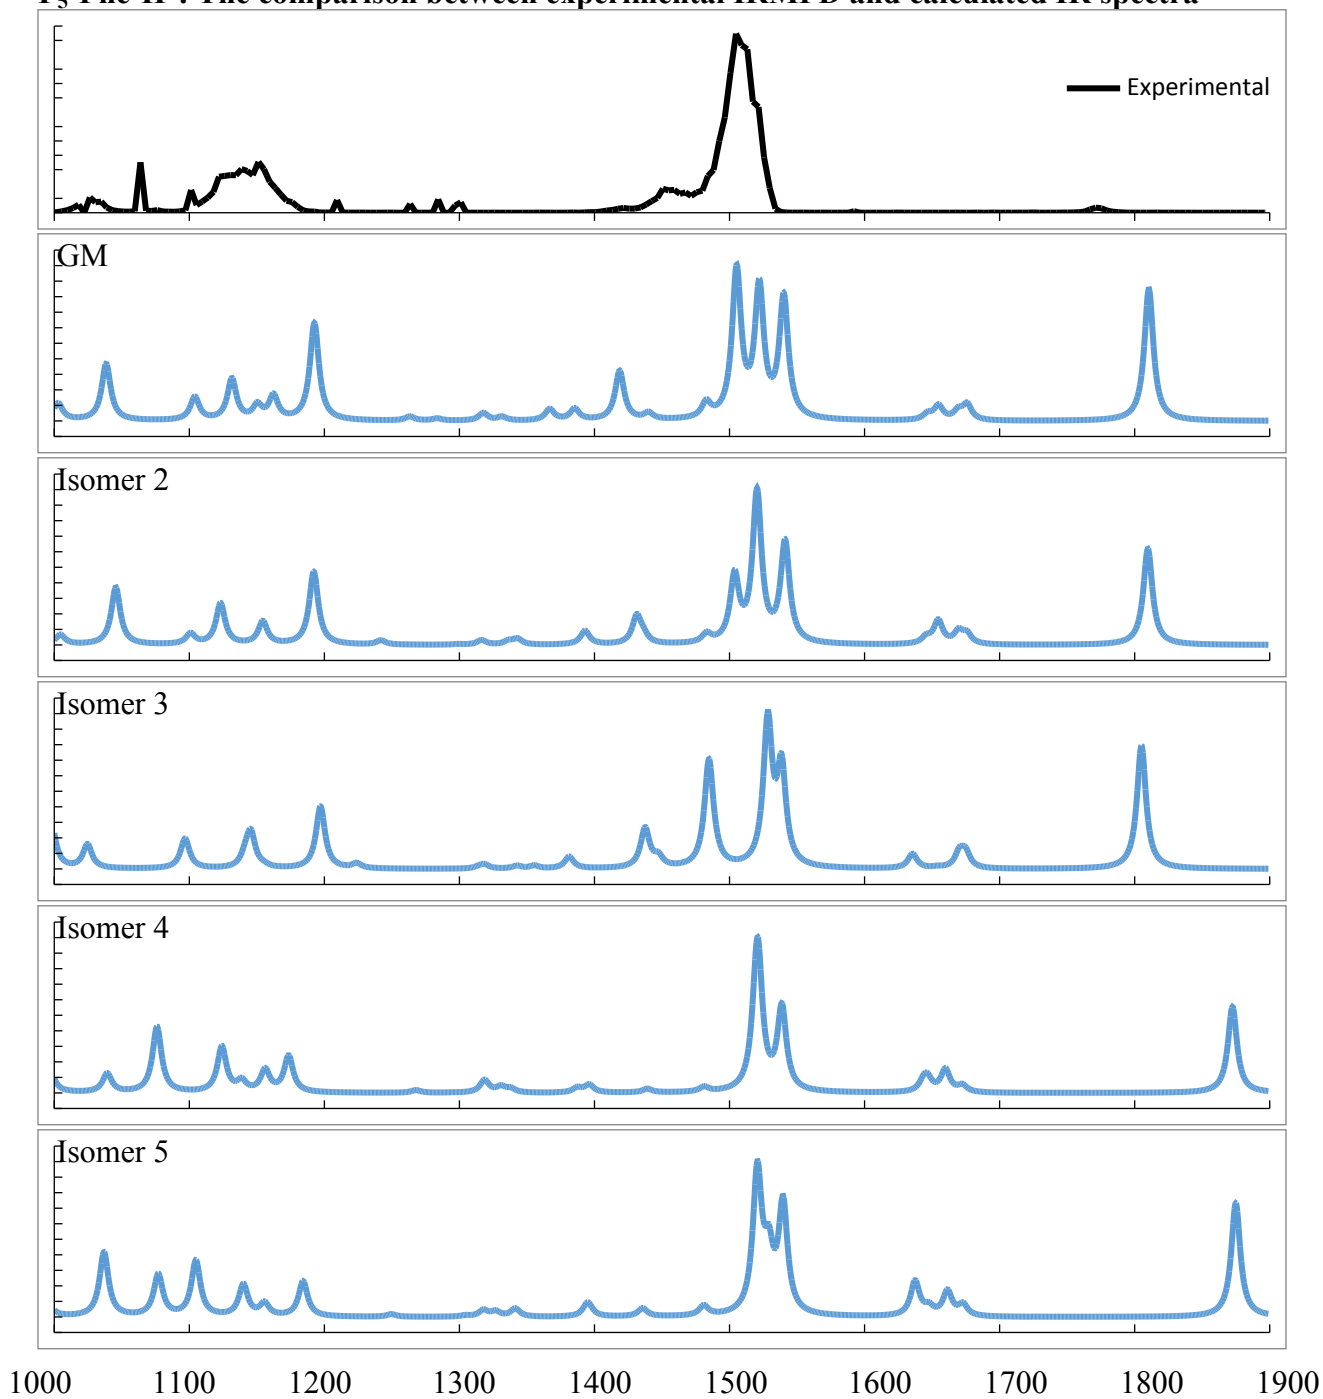

**3-CN-Phe•H<sup>+</sup>****Table S7 The Gibbs' Energies and Relative energies of 3-CN-Phe•H<sup>+</sup>**

| 3CN-Phe Isomer | Gibbs (hartree) | Relative energy (kJ/mol) |
|----------------|-----------------|--------------------------|
| Isomer 1       | -647.4213       | 0.00                     |
| Isomer 2       | -647.4197       | 4.15                     |
| Isomer 3       | -647.4164       | 12.86                    |
| Isomer 4       | -647.4160       | 13.93                    |
| Isomer 5       | -647.4152       | 15.96                    |
| Isomer 6       | -647.4075       | 36.28                    |
| Isomer 7       | -647.4071       | 37.42                    |
| Isomer 8       | -647.4066       | 38.65                    |
| Isomer 9       | -647.4057       | 41.07                    |

### 3-CN-Phe·H<sup>+</sup>: The XYZ atomic coordinates and structures

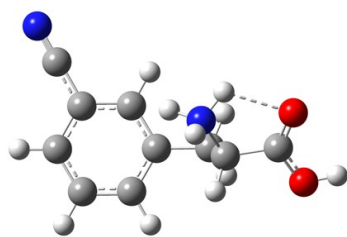

Isomer 1, 0.0kJ/mol

|   |           |           |           |
|---|-----------|-----------|-----------|
| C | 0.828636  | 1.880264  | 0.061430  |
| C | 2.148073  | 2.081550  | 0.455901  |
| C | 3.076220  | 1.045703  | 0.374338  |
| C | 2.678237  | -0.201323 | -0.119576 |
| C | 1.348389  | -0.401094 | -0.528079 |
| C | 0.415948  | 0.635044  | -0.433974 |
| H | 0.123999  | 2.703978  | 0.115752  |
| H | 2.459739  | 3.052386  | 0.821573  |
| H | 4.103605  | 1.200084  | 0.679110  |
| H | 1.073103  | -1.357395 | -0.962360 |
| C | -1.024094 | 0.394948  | -0.836358 |
| H | -1.436195 | 1.256396  | -1.365759 |
| H | -1.092930 | -0.459773 | -1.516080 |
| C | -1.941076 | 0.148471  | 0.387645  |
| C | -3.344359 | -0.301700 | -0.026862 |
| C | 3.612688  | -1.281079 | -0.216765 |
| N | 4.349130  | -2.167434 | -0.286756 |
| O | -4.038556 | 0.695625  | -0.550253 |
| H | -4.912669 | 0.380760  | -0.839442 |
| O | -3.705569 | -1.445244 | 0.102194  |
| H | -1.990084 | 1.039621  | 1.013430  |
| N | -1.395452 | -0.983272 | 1.235960  |
| H | -1.612077 | -0.862633 | 2.228528  |
| H | -0.372935 | -1.050860 | 1.131303  |
| H | -1.858270 | -1.855370 | 0.927775  |

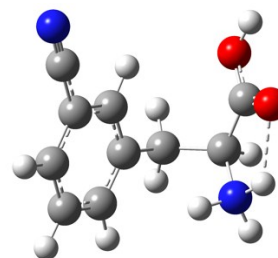

Isomer 2, 4.1kJ/mol

|  |           |           |           |
|--|-----------|-----------|-----------|
|  | -0.184179 | -0.872393 | -0.695920 |
|  | -0.907969 | 0.316886  | -0.577798 |
|  | -2.190326 | 0.312685  | -0.014769 |
|  | -2.761265 | -0.888189 | 0.431695  |
|  | -2.049360 | -2.074347 | 0.303605  |
|  | -0.770235 | -2.069106 | -0.256180 |
|  | -0.498157 | 1.251122  | -0.943290 |
|  | -3.756064 | -0.883672 | 0.858915  |
|  | -2.495878 | -3.008016 | 0.623316  |
|  | -0.249876 | -3.012541 | -0.397896 |
|  | -2.912009 | 1.544164  | 0.097459  |
|  | -3.478611 | 2.545601  | 0.190429  |
|  | 1.218390  | -0.873672 | -1.270095 |
|  | 1.466453  | -1.866575 | -1.654086 |
|  | 1.306890  | -0.182345 | -2.110061 |
|  | 2.301256  | -0.468919 | -0.242888 |
|  | 3.294253  | -0.686716 | -0.643732 |
|  | 2.306513  | 1.004149  | 0.196168  |
|  | 2.153234  | -1.244794 | 1.051840  |
|  | 1.172652  | -1.546081 | 1.163973  |
|  | 2.759691  | -2.065188 | 1.101523  |
|  | 2.341265  | 1.314754  | 1.361383  |
|  | 2.312319  | 1.828316  | -0.838365 |
|  | 2.371742  | 2.749560  | -0.530378 |
|  | 2.372378  | -0.587299 | 1.824026  |

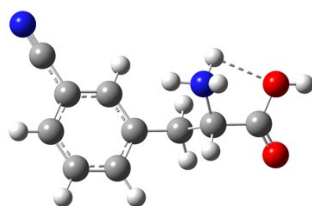

Isomer 3, 12.9kJ/mol

|   |          |          |          |
|---|----------|----------|----------|
| C | 0.840367 | 1.881946 | 0.055479 |
| C | 2.158047 | 2.078580 | 0.458475 |

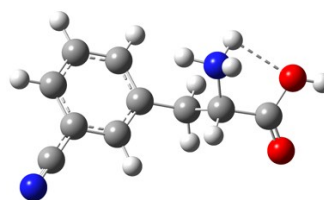

Isomer 4, 13.9kJ/mol

|  |           |          |           |
|--|-----------|----------|-----------|
|  | -0.888855 | 1.783905 | -0.519045 |
|  | -2.214485 | 2.067996 | -0.184919 |

|   |           |           |           |           |           |           |
|---|-----------|-----------|-----------|-----------|-----------|-----------|
| C | 3.082523  | 1.039007  | 0.384759  | -3.107519 | 1.035960  | 0.074242  |
| C | 2.682451  | -0.207464 | -0.109250 | -2.671220 | -0.295213 | -0.008546 |
| C | 1.354797  | -0.402173 | -0.526566 | -1.343128 | -0.579795 | -0.349303 |
| C | 0.425512  | 0.637459  | -0.440674 | -0.441516 | 0.458147  | -0.603066 |
| H | 0.138502  | 2.708427  | 0.103161  | -0.213283 | 2.600548  | -0.755933 |
| H | 2.471011  | 3.048976  | 0.824158  | -2.551872 | 3.096339  | -0.140450 |
| H | 4.108512  | 1.189679  | 0.696047  | -4.138195 | 1.247578  | 0.329510  |
| H | 1.079064  | -1.358341 | -0.960748 | -1.034685 | -1.616172 | -0.436581 |
| C | -1.013713 | 0.407989  | -0.853404 | 1.001691  | 0.149995  | -0.949655 |
| H | -1.423678 | 1.280237  | -1.366696 | 1.072163  | -0.634407 | -1.706609 |
| H | -1.086649 | -0.433499 | -1.549572 | 1.492353  | 1.035496  | -1.365259 |
| C | -1.932832 | 0.152087  | 0.363813  | 1.799047  | -0.357766 | 0.273169  |
| C | -3.380920 | -0.083775 | -0.066525 | 3.263207  | -0.620564 | -0.079042 |
| C | 3.611307  | -1.292897 | -0.196687 | -3.578374 | -1.371295 | 0.254276  |
| N | 4.340870  | -2.185565 | -0.258446 | -4.298706 | -2.245357 | 0.477138  |
| O | -3.737694 | -1.377769 | 0.091869  | 4.077980  | 0.302085  | 0.480717  |
| H | -4.648723 | -1.510561 | -0.221907 | 4.998437  | 0.133597  | 0.215347  |
| O | -4.063709 | 0.785020  | -0.513007 | 3.598561  | -1.516624 | -0.789258 |
| H | -1.911304 | 1.011471  | 1.034966  | 1.365283  | -1.286995 | 0.644286  |
| N | -1.405163 | -1.031211 | 1.165018  | 1.686050  | 0.650092  | 1.410293  |
| H | -0.377472 | -0.968833 | 1.223786  | 2.315938  | 1.443570  | 1.249249  |
| H | -1.790718 | -1.058289 | 2.112837  | 1.941504  | 0.242372  | 2.313805  |
| H | -1.662503 | -1.914391 | 0.710542  | 0.715543  | 0.993017  | 1.460282  |

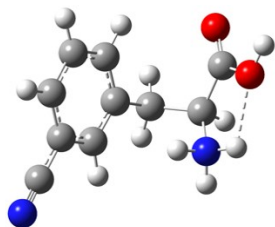

Isomer 5, 16.0kJ/mol

|   |           |           |           |
|---|-----------|-----------|-----------|
| C | 0.169805  | 1.621606  | 0.352907  |
| C | 1.272710  | 2.159183  | -0.305988 |
| C | 2.415499  | 1.392712  | -0.519157 |
| C | 2.458828  | 0.074559  | -0.051145 |
| C | 1.351806  | -0.463492 | 0.625704  |
| C | 0.196469  | 0.299635  | 0.821837  |
| H | -0.705868 | 2.237269  | 0.523629  |
| H | 1.245699  | 3.186467  | -0.648674 |
| H | 3.273783  | 1.810089  | -1.030445 |
| H | 1.433983  | -1.463398 | 1.041935  |
| C | -1.001605 | -0.311792 | 1.521925  |
| H | -0.679398 | -1.082449 | 2.227749  |

|   |           |           |           |
|---|-----------|-----------|-----------|
| H | -1.546916 | 0.437313  | 2.098479  |
| C | -2.024835 | -0.933960 | 0.549422  |
| C | -2.799961 | 0.109428  | -0.268660 |
| C | 3.621172  | -0.736809 | -0.249002 |
| N | 4.540805  | -1.415076 | -0.414231 |
| O | -2.988400 | -0.306040 | -1.539793 |
| H | -3.526218 | 0.341828  | -2.026182 |
| O | -3.209850 | 1.125397  | 0.201362  |
| H | -2.773147 | -1.506620 | 1.104190  |
| N | -1.339903 | -1.921142 | -0.387713 |
| H | -0.433377 | -1.528974 | -0.688319 |
| H | -1.154625 | -2.815141 | 0.074773  |
| H | -1.913545 | -2.084134 | -1.223129 |

---

### 3-CN-Phe·H<sup>+</sup>: The comparison between experimental IRMPD and calculated IR spectra

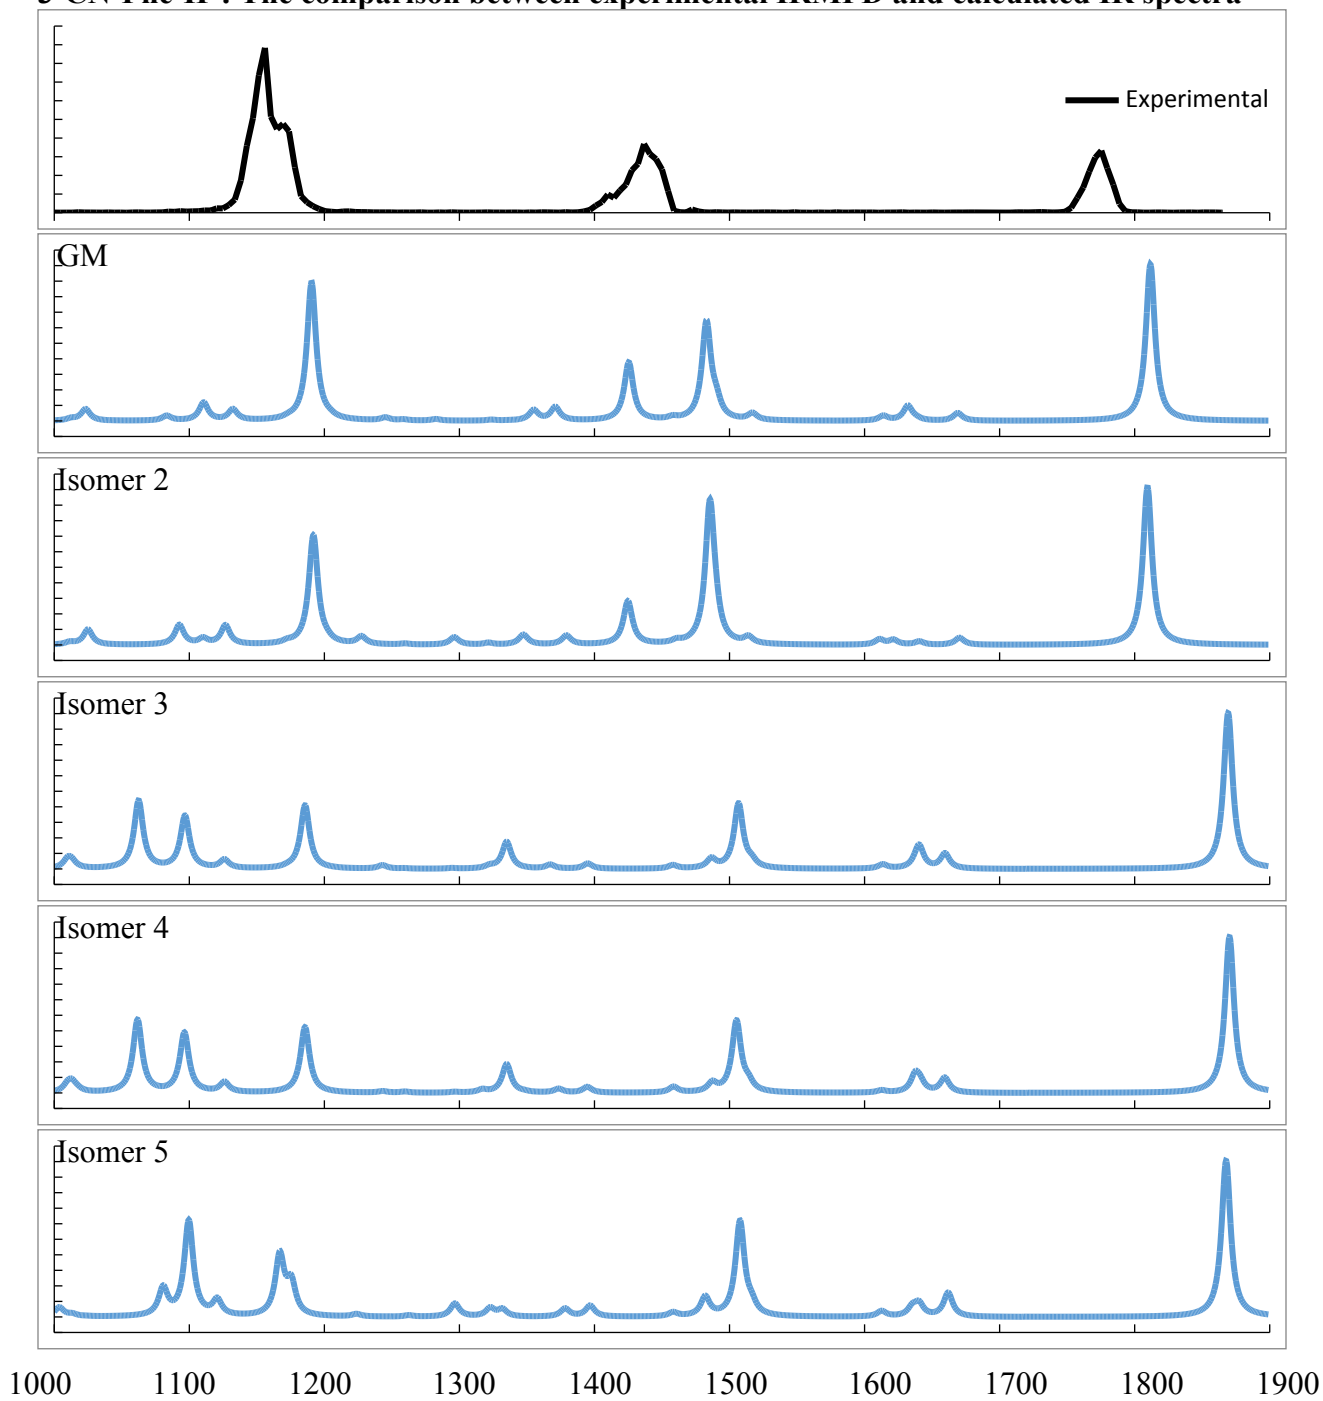

**3-CF<sub>3</sub>-Phe•H<sup>+</sup>****Table S8 The Gibbs' Energies and Relative energies of 3-CF<sub>3</sub>-Phe•H<sup>+</sup>**

| 3CF <sub>3</sub> -Phe Isomer | Gibbs (hartree) | Relative energy (kJ/mol) |
|------------------------------|-----------------|--------------------------|
| Isomer 1                     | -892.3060       | 0.00                     |
| Isomer 2                     | -892.3055       | 1.24                     |
| Isomer 3                     | -892.3051       | 2.32                     |
| Isomer 4                     | -892.3041       | 4.98                     |
| Isomer 5                     | -892.3010       | 13.15                    |
| Isomer 6                     | -892.3004       | 14.78                    |
| Isomer 7                     | -892.3003       | 14.96                    |
| Isomer 8                     | -892.2991       | 18.20                    |
| Isomer 9                     | -892.2990       | 18.37                    |
| Isomer 10                    | -892.2929       | 34.30                    |
| Isomer 11                    | -892.2921       | 36.54                    |
| Isomer 12                    | -892.2915       | 37.96                    |
| Isomer 13                    | -892.2915       | 38.12                    |
| Isomer 14                    | -892.2907       | 40.16                    |
| Isomer 15                    | -892.2901       | 41.63                    |
| Isomer 16                    | -892.2822       | 62.51                    |



### 3-CF<sub>3</sub>-Phe·H<sup>+</sup>: The XYZ atomic coordinates and structures

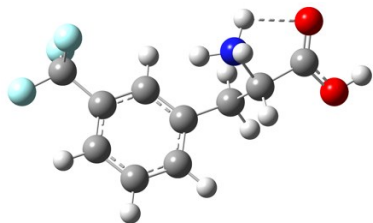

GM, 0.0kJ/mol

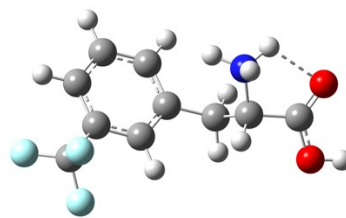

Isomer 2, 1.2kJ/mol

|   |           |           |           |           |           |           |
|---|-----------|-----------|-----------|-----------|-----------|-----------|
| C | 0.033473  | 2.178054  | -0.045484 | 0.004228  | 2.084672  | -0.515758 |
| C | 0.307606  | 0.888658  | 0.433958  | 0.291411  | 0.719117  | -0.645565 |
| C | -0.730804 | -0.044140 | 0.499879  | -0.736231 | -0.211345 | -0.456881 |
| C | -2.282541 | 1.579049  | -0.400712 | -2.301925 | 1.580277  | -0.005610 |
| C | -1.251504 | 2.519865  | -0.450505 | -1.286934 | 2.511236  | -0.201282 |
| H | 0.820829  | 2.924431  | -0.077921 | 0.778480  | 2.822853  | -0.703873 |
| H | -0.559892 | -1.027567 | 0.928395  | -0.548948 | -1.272113 | -0.585008 |
| H | -1.457935 | 3.523615  | -0.801593 | -1.502269 | 3.569919  | -0.123142 |
| C | 1.710111  | 0.488287  | 0.838763  | 1.699596  | 0.256484  | -0.958346 |
| C | 2.590012  | 0.136219  | -0.387681 | 2.390402  | -0.376802 | 0.275074  |
| C | 3.928833  | -0.480692 | 0.023369  | 3.885644  | -0.606397 | 0.045135  |
| N | 1.910208  | -0.917488 | -1.239182 | 2.309614  | 0.564813  | 1.460645  |
| O | 4.150470  | -1.659012 | -0.108511 | 4.720370  | 0.094677  | 0.562449  |
| O | 4.738971  | 0.424413  | 0.548684  | 4.099750  | -1.610043 | -0.789547 |
| H | 1.681661  | -0.368018 | 1.519378  | 2.302444  | 1.094780  | -1.319893 |
| H | 2.219408  | 1.297769  | 1.365399  | 1.705837  | -0.502229 | -1.743928 |
| H | 2.744869  | 1.017509  | -1.010170 | 1.895477  | -1.306632 | 0.554883  |
| C | -3.096002 | -0.758904 | 0.114416  | -3.101070 | -0.808259 | 0.120729  |
| H | -3.283024 | 1.845550  | -0.716115 | -3.306950 | 1.906233  | 0.230374  |
| C | -2.018861 | 0.300344  | 0.076037  | -2.021568 | 0.219365  | -0.137630 |
| F | -3.096436 | -1.419187 | 1.290115  | -3.068226 | -1.213928 | 1.414201  |
| F | -2.877795 | -1.687190 | -0.854719 | -2.932947 | -1.907741 | -0.640744 |
| F | -4.320324 | -0.253487 | -0.080198 | -4.328324 | -0.322191 | -0.116839 |
| H | 0.886506  | -0.858530 | -1.134099 | 3.185935  | 1.113678  | 1.482207  |
| H | 2.261143  | -1.840985 | -0.934152 | 2.243817  | 0.063567  | 2.349986  |
| H | 2.140055  | -0.821071 | -2.231322 | 1.488455  | 1.180051  | 1.371406  |
| H | 5.568456  | 0.004831  | 0.836074  | 5.053616  | -1.716212 | -0.949503 |

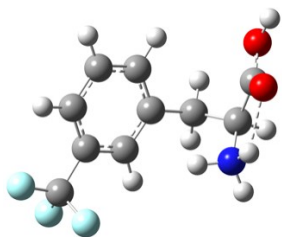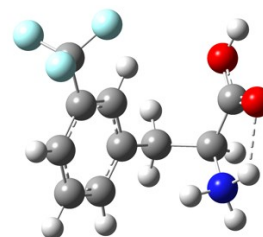

|   | Isomer 3, 2.3kJ/mol |           |           | Isomer 4, 5.0kJ/mol |           |           |
|---|---------------------|-----------|-----------|---------------------|-----------|-----------|
| C | -0.642484           | 1.719359  | 0.340143  | -0.258191           | 2.377311  | -0.270422 |
| C | -0.504978           | 0.416453  | 0.841685  | -0.580380           | 1.084184  | -0.707549 |
| C | 0.726590            | -0.231197 | 0.704683  | 0.377895            | 0.072271  | -0.585051 |
| C | 1.644660            | 1.686792  | -0.447728 | 1.932458            | 1.633461  | 0.420669  |
| C | 0.424893            | 2.347964  | -0.291018 | 0.990381            | 2.648801  | 0.290837  |
| H | -1.578142           | 2.252653  | 0.467870  | -0.964936           | 3.190733  | -0.411918 |
| H | 0.884887            | -1.209289 | 1.150871  | 0.166659            | -0.928149 | -0.943432 |
| H | 0.313114            | 3.360200  | -0.660120 | 1.232240            | 3.654615  | 0.612035  |
| C | -1.664872           | -0.306887 | 1.493471  | -1.953613           | 0.787848  | -1.275044 |
| C | -2.580243           | -1.029744 | 0.475700  | -2.918499           | 0.164392  | -0.239503 |
| C | -3.434811           | -0.125243 | -0.424546 | -2.607579           | -1.275518 | 0.199046  |
| N | -1.775989           | -1.875399 | -0.492169 | -2.924311           | 0.956178  | 1.053792  |
| O | -4.125836           | 0.758878  | 0.277792  | -2.567933           | -1.585449 | 1.364357  |
| O | -3.468038           | -0.271224 | -1.621504 | -2.444510           | -2.083575 | -0.835438 |
| H | -2.232935           | -1.797658 | -1.419254 | -1.898516           | 0.091787  | -2.113939 |
| H | -2.300034           | 0.379127  | 2.056231  | -2.409554           | 1.704810  | -1.657441 |
| H | -1.295407           | -1.049369 | 2.205674  | -3.938914           | 0.166904  | -0.630549 |
| H | -3.266162           | -1.697585 | 1.002586  | 2.660860            | -0.750236 | 0.053418  |
| C | 3.085197            | -0.365987 | -0.107444 | 2.902564            | 1.838203  | 0.855581  |
| H | 2.474242            | 2.175908  | -0.941559 | 1.621721            | 0.347165  | -0.022176 |
| C | 1.792127            | 0.398905  | 0.053452  | 2.084117            | -1.966468 | 0.180917  |
| F | 4.068784            | 0.386374  | -0.614845 | 3.489476            | -0.579890 | 1.097789  |
| F | 2.905514            | -1.424174 | -0.942943 | 3.414942            | -0.782566 | -1.064199 |
| F | 3.507791            | -0.871195 | 1.069651  | -2.994168           | 0.269379  | 1.828139  |
| H | -1.708955           | -2.855259 | -0.211199 | -3.687510           | 1.632646  | 1.108919  |
| H | -0.822178           | -1.488214 | -0.579636 | -2.026072           | 1.454890  | 1.154795  |
| H | -4.700794           | 1.274508  | -0.313735 | -2.299210           | -2.994635 | -0.525990 |

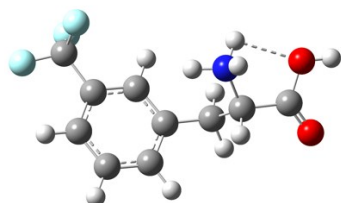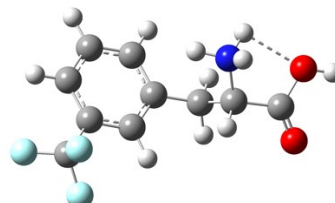

|   | Isomer 5, 13.2kJ/mol |           |           | Isomer 6, 14.8kJ/mol |           |           |
|---|----------------------|-----------|-----------|----------------------|-----------|-----------|
| C | 0.023108             | 2.184705  | -0.038673 | -0.011873            | 2.107276  | -0.493025 |
| C | 0.299626             | 0.896600  | 0.443545  | 0.285195             | 0.745655  | -0.640189 |
| C | -0.736067            | -0.039515 | 0.504063  | -0.735712            | -0.194413 | -0.459276 |
| C | -2.288615            | 1.576883  | -0.407007 | -2.312800            | 1.580305  | 0.017477  |
| C | -1.260868            | 2.521412  | -0.451429 | -1.304829            | 2.520797  | -0.170407 |
| H | 0.808167             | 2.933638  | -0.066949 | 0.757152             | 2.853015  | -0.671896 |
| H | -0.564532            | -1.022058 | 0.934254  | -0.542091            | -1.252122 | -0.603125 |

|   |           |           |           |           |           |           |
|---|-----------|-----------|-----------|-----------|-----------|-----------|
| H | -1.468802 | 3.524250  | -0.804172 | -1.527637 | 3.576904  | -0.079409 |
| C | 1.702963  | 0.506289  | 0.856490  | 1.692961  | 0.293157  | -0.972387 |
| C | 2.580076  | 0.140022  | -0.364641 | 2.383385  | -0.380956 | 0.235723  |
| C | 3.989482  | -0.271328 | 0.060336  | 3.824676  | -0.774044 | -0.085555 |
| N | 1.908341  | -0.968866 | -1.164031 | 2.329036  | 0.553416  | 1.437785  |
| O | 4.778444  | 0.508050  | 0.497177  | 4.094305  | -1.656734 | -0.839408 |
| O | 4.181486  | -1.601167 | -0.088728 | 4.708152  | 0.024806  | 0.555217  |
| H | 1.680750  | -0.335413 | 1.555857  | 2.296476  | 1.139571  | -1.314194 |
| H | 2.213671  | 1.327471  | 1.363436  | 1.697893  | -0.444663 | -1.777917 |
| H | 2.660841  | 0.996555  | -1.034823 | 1.839558  | -1.281295 | 0.523362  |
| C | -3.094274 | -0.765302 | 0.102933  | -3.094238 | -0.814980 | 0.121259  |
| H | -3.288206 | 1.839225  | -0.728710 | -3.319409 | 1.896427  | 0.260037  |
| C | -2.022666 | 0.299327  | 0.071987  | -2.023117 | 0.223180  | -0.130056 |
| F | -3.101411 | -1.424500 | 1.279436  | -3.054041 | -1.232604 | 1.410935  |
| F | -2.861503 | -1.694873 | -0.862746 | -2.920804 | -1.905394 | -0.651159 |
| F | -4.319537 | -0.268175 | -0.103930 | -4.325741 | -0.335146 | -0.107186 |
| H | 2.062829  | -1.878033 | -0.714377 | 2.494195  | 0.059450  | 2.318857  |
| H | 0.894121  | -0.784373 | -1.211777 | 1.399957  | 0.998930  | 1.472245  |
| H | 2.278527  | -1.037457 | -2.115735 | 3.048829  | 1.279996  | 1.359105  |
| H | 5.070265  | -1.843433 | 0.223161  | 5.615548  | -0.222267 | 0.307277  |

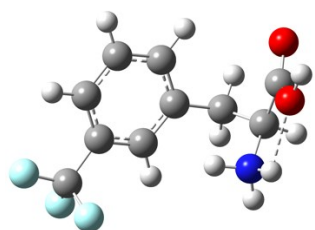

Isomer 7, 15.0kJ/mol

|   |           |           |           |
|---|-----------|-----------|-----------|
| C | -0.628662 | 1.768265  | 0.355406  |
| C | -0.506120 | 0.467436  | 0.867928  |
| C | 0.712000  | -0.203190 | 0.719179  |
| C | 1.646497  | 1.685801  | -0.466837 |
| C | 0.441587  | 2.370290  | -0.297479 |
| H | -1.554914 | 2.315688  | 0.487869  |
| H | 0.862120  | -1.178032 | 1.175316  |
| H | 0.342556  | 3.381518  | -0.673105 |
| C | -1.668742 | -0.223674 | 1.551982  |
| C | -2.594401 | -0.966060 | 0.565077  |
| C | -3.432241 | -0.021126 | -0.308630 |
| N | -1.786639 | -1.908064 | -0.318946 |
| O | -3.954215 | 0.962080  | 0.118172  |
| O | -3.531770 | -0.482012 | -1.574356 |
| H | -2.300021 | 0.491006  | 2.082553  |

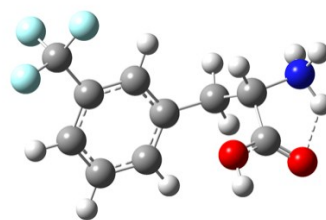

Isomer 8, 18.2kJ/mol

|           |           |           |
|-----------|-----------|-----------|
| -0.309314 | 1.827215  | -0.856452 |
| -0.432855 | 0.435726  | -0.872966 |
| 0.660372  | -0.352026 | -0.507743 |
| 1.972972  | 1.636120  | -0.091673 |
| 0.888562  | 2.423029  | -0.468562 |
| -1.144621 | 2.451821  | -1.156028 |
| 0.597103  | -1.434660 | -0.532695 |
| 0.978247  | 3.502435  | -0.463851 |
| -1.730288 | -0.220347 | -1.298094 |
| -2.498957 | -0.889919 | -0.132123 |
| -3.082158 | 0.115989  | 0.869490  |
| -3.727610 | -1.602115 | -0.685812 |
| -4.237541 | 0.463901  | 0.794453  |
| -2.191064 | 0.522016  | 1.751595  |
| -1.516976 | -1.001839 | -2.037465 |

|   |           |           |           |           |           |           |
|---|-----------|-----------|-----------|-----------|-----------|-----------|
| H | -1.305585 | -0.939912 | 2.294292  | -2.383648 | 0.515063  | -1.777950 |
| H | -3.306116 | -1.591452 | 1.110928  | -1.876919 | -1.627348 | 0.374336  |
| C | 3.051441  | -0.392592 | -0.134398 | 3.038724  | -0.623145 | 0.235901  |
| H | 2.477493  | 2.155144  | -0.977304 | 2.903758  | 2.096089  | 0.215143  |
| C | 1.778143  | 0.399810  | 0.044405  | 1.853781  | 0.246729  | -0.112171 |
| F | 2.840151  | -1.438049 | -0.980572 | 2.646317  | -1.801773 | 0.773800  |
| F | 3.471693  | -0.922237 | 1.032857  | 3.858674  | -0.026587 | 1.118324  |
| F | 4.048756  | 0.340767  | -0.642243 | 3.770521  | -0.917092 | -0.861335 |
| H | -2.309196 | -2.142189 | -1.170637 | -4.513942 | -0.929663 | -0.605351 |
| H | -1.539424 | -2.770234 | 0.173794  | -3.977072 | -2.430787 | -0.138823 |
| H | -0.907218 | -1.441430 | -0.595040 | -3.603357 | -1.885812 | -1.661014 |
| H | -4.107771 | 0.101713  | -2.096744 | -2.585102 | 1.185030  | 2.345254  |

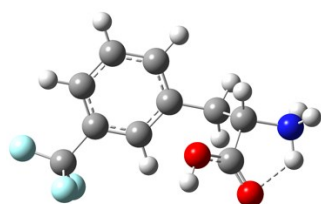

Isomer 9, 18.4kJ/mol

|   |           |           |           |
|---|-----------|-----------|-----------|
| C | -0.220482 | 2.258150  | -0.204925 |
| C | -0.489197 | 1.064305  | 0.473860  |
| C | 0.525183  | 0.119645  | 0.620834  |
| C | 2.049892  | 1.541818  | -0.605849 |
| C | 1.041388  | 2.494699  | -0.739974 |
| H | -0.990375 | 3.017529  | -0.303236 |
| H | 0.346617  | -0.798910 | 1.169238  |
| H | 1.244908  | 3.425334  | -1.255306 |
| C | -1.863416 | 0.798427  | 1.051138  |
| C | -2.904061 | 0.344538  | -0.003471 |
| C | -2.589055 | -1.026225 | -0.618845 |
| N | -4.245762 | 0.129282  | 0.687211  |
| O | -1.733395 | -0.944591 | -1.617553 |
| O | -3.098295 | -2.030514 | -0.179243 |
| H | -4.279181 | -0.875382 | 0.945471  |
| H | -2.248952 | 1.713408  | 1.515737  |
| H | -1.799704 | 0.033790  | 1.832172  |
| H | -3.034107 | 1.099821  | -0.778000 |
| C | 2.845835  | -0.712751 | 0.200002  |
| H | 3.034533  | 1.724999  | -1.016358 |
| C | 1.788125  | 0.358097  | 0.079029  |
| F | 4.084699  | -0.230669 | 0.017213  |
| F | 2.650753  | -1.686802 | -0.725388 |
| F | 2.808814  | -1.313506 | 1.408637  |

|   |           |           |           |
|---|-----------|-----------|-----------|
| H | -5.038827 | 0.311824  | 0.066092  |
| H | -4.349264 | 0.711684  | 1.522078  |
| H | -1.515459 | -1.833657 | -1.948957 |

---

### 3-CF<sub>3</sub>-Phe·H<sup>+</sup>: The comparison between experimental IRMPD and calculated IR spectra

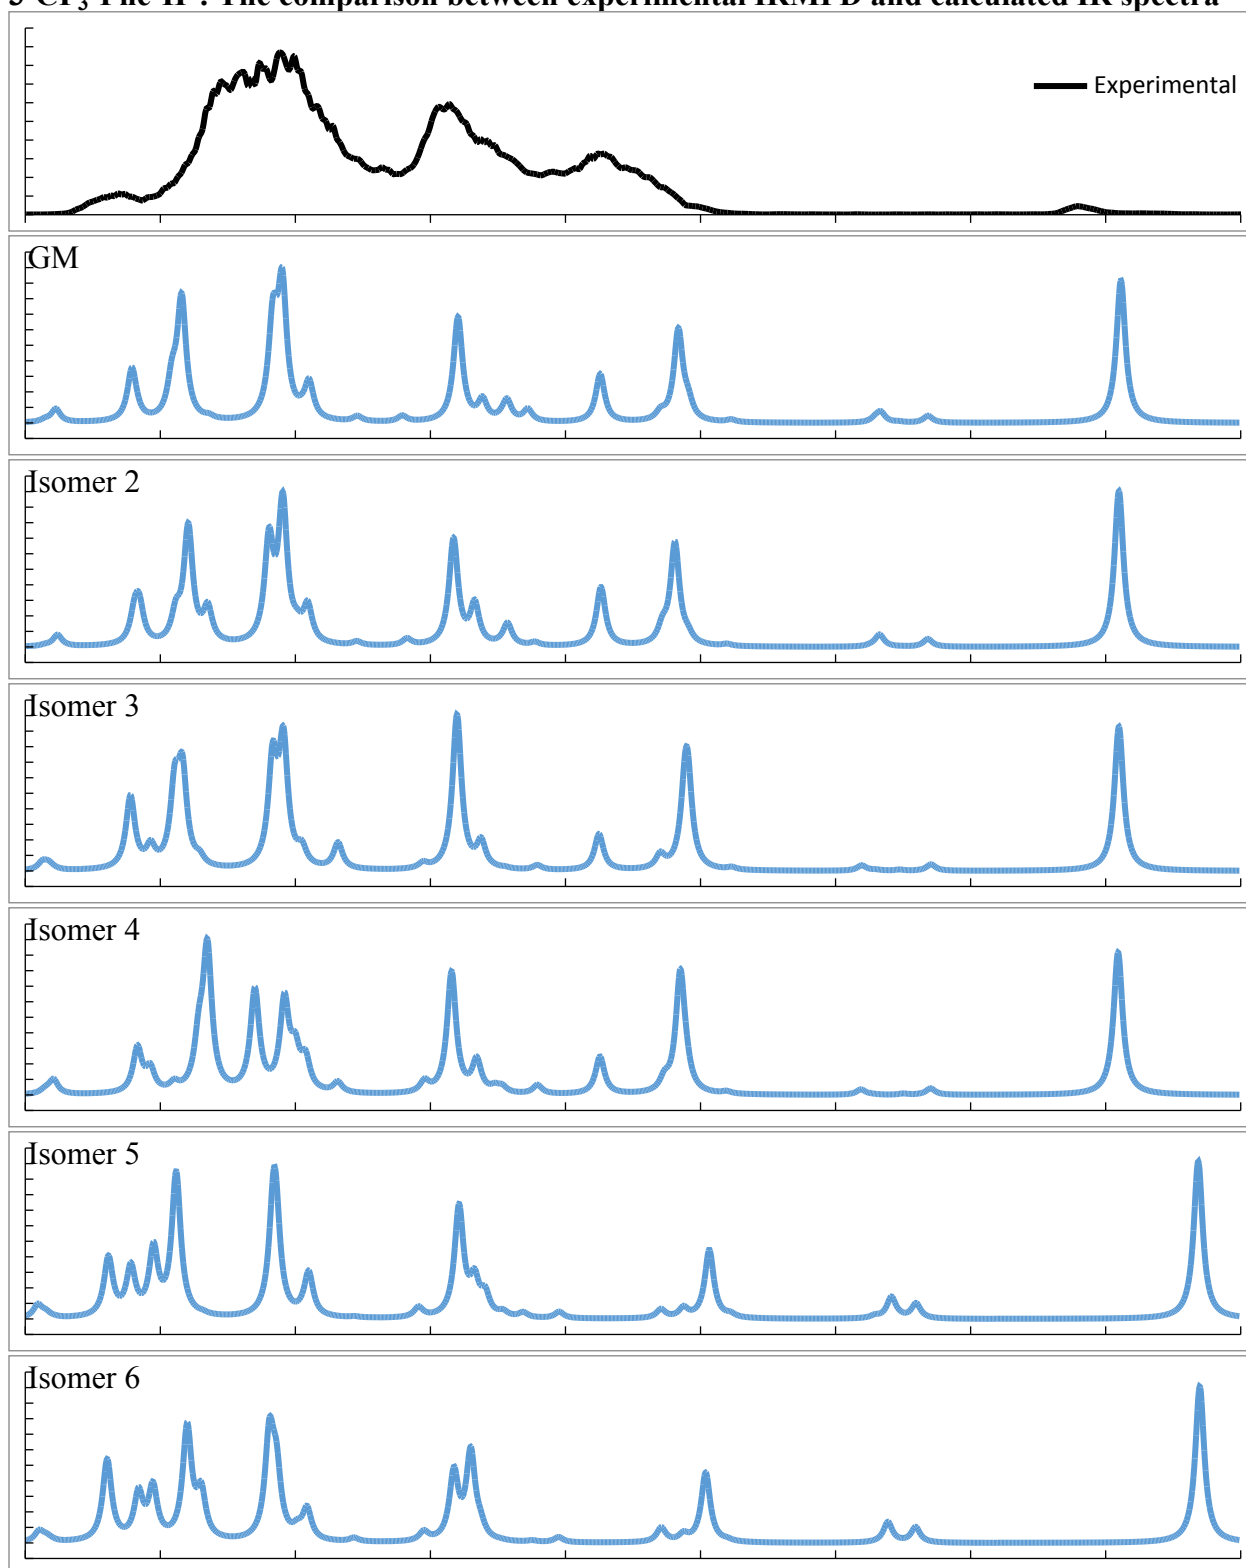

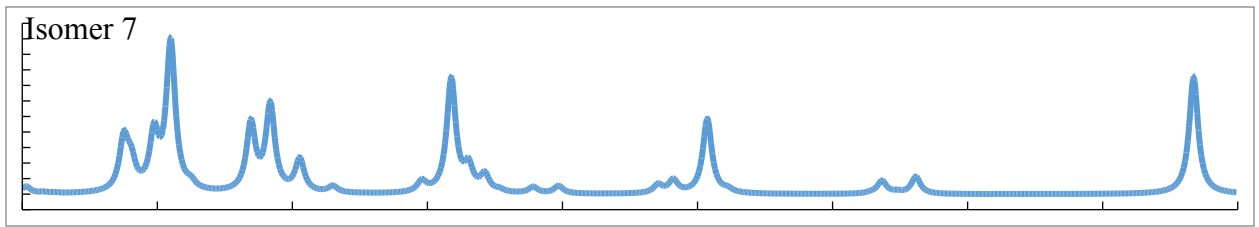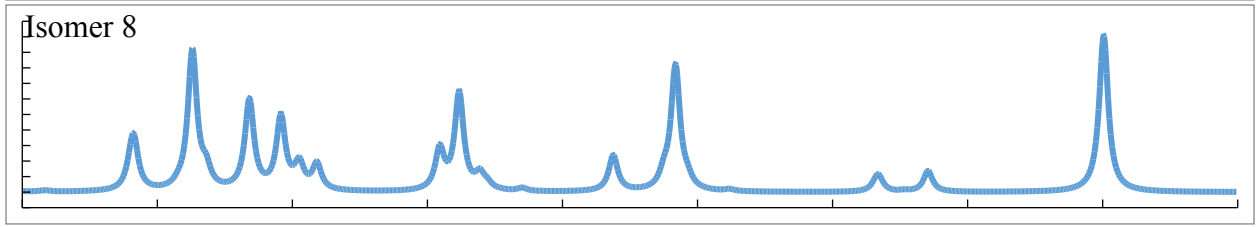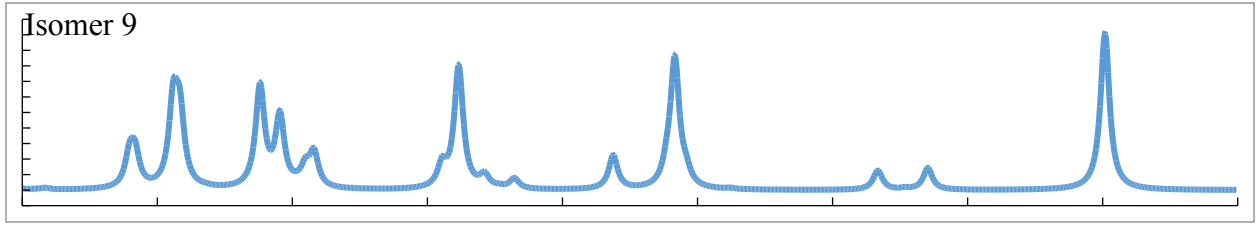

1000 1100 1200 1300 1400 1500 1600 1700 1800 1900

**3,4-(OMe)<sub>2</sub>-Phe•H<sup>+</sup>****Table S9 The Gibbs' Energies and Relative energies of 3,4-(OMe)<sub>2</sub>-Phe•H<sup>+</sup>**

| 3,4(MeO) <sub>2</sub> -Phe Isomer | Gibbs (hartree) | Relative energy (kJ/mol) |
|-----------------------------------|-----------------|--------------------------|
| Isomer 1                          | -784.2176       | 0.00                     |
| Isomer 2                          | -784.2170       | 1.46                     |
| Isomer 3                          | -784.2169       | 1.71                     |
| Isomer 4                          | -784.2165       | 2.89                     |
| Isomer 5                          | -784.2162       | 3.67                     |
| Isomer 6                          | -784.2157       | 4.98                     |
| Isomer 7                          | -784.2153       | 6.04                     |
| Isomer 8                          | -784.2151       | 6.47                     |
| Isomer 9                          | -784.2143       | 8.71                     |
| Isomer 10                         | -784.2140       | 9.44                     |
| Isomer 11                         | -784.2119       | 15.06                    |
| Isomer 12                         | -784.2118       | 15.21                    |
| Isomer 13                         | -784.2113       | 16.54                    |
| Isomer 14                         | -784.2109       | 17.68                    |
| Isomer 15                         | -784.2106       | 18.37                    |
| Isomer 16                         | -784.2102       | 19.31                    |
| Isomer 17                         | -784.2092       | 22.08                    |
| Isomer 18                         | -784.2072       | 27.36                    |
| Isomer 19                         | -784.2068       | 28.43                    |
| Isomer 20                         | -784.2067       | 28.59                    |
| Isomer 21                         | -784.2067       | 28.65                    |
| Isomer 22                         | -784.2044       | 34.56                    |
| Isomer 23                         | -784.2042       | 35.28                    |
| Isomer 24                         | -784.2013       | 42.79                    |



### 3,4-(OMe)<sub>2</sub>-Phe·H<sup>+</sup>: The XYZ atomic coordinates and structures

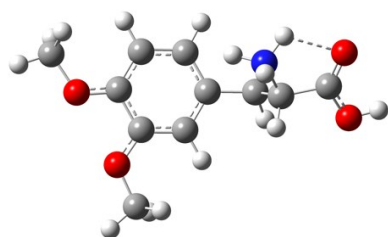

Isomer 1, 0.0kJ/mol

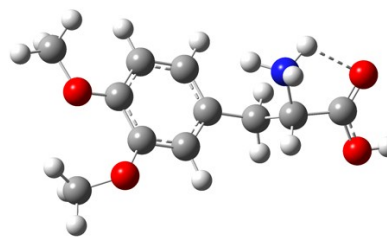

Isomer 2, 1.5kJ/mol

|   |           |           |           |           |           |           |
|---|-----------|-----------|-----------|-----------|-----------|-----------|
| C | -0.240188 | -0.139429 | -0.696651 | -0.353591 | -0.060859 | -0.693508 |
| C | 0.326587  | -1.411528 | -0.736286 | 0.230846  | -1.320594 | -0.844239 |
| C | 1.682701  | -1.599335 | -0.425411 | 1.581933  | -1.517478 | -0.539239 |
| C | 2.483930  | -0.521179 | -0.070549 | 2.370443  | -0.467273 | -0.068758 |
| C | 1.912821  | 0.788414  | -0.033446 | 1.790849  | 0.825306  | 0.066356  |
| C | 0.565556  | 0.957501  | -0.334323 | 0.444461  | 0.997995  | -0.238938 |
| H | -0.255120 | -2.263120 | -1.077369 | -0.342186 | -2.149493 | -1.248842 |
| H | 0.139030  | 1.952939  | -0.325880 | 0.043881  | 2.000846  | -0.132688 |
| C | -1.713704 | 0.049647  | -0.967693 | -1.825806 | 0.145973  | -0.965019 |
| H | -1.915568 | 0.965015  | -1.527366 | -2.015060 | 1.067661  | -1.518916 |
| H | -2.099996 | -0.783390 | -1.562640 | -2.220853 | -0.678218 | -1.566456 |
| C | -2.525927 | 0.144947  | 0.356392  | -2.634238 | 0.245198  | 0.358563  |
| H | -2.293846 | 1.074885  | 0.874545  | -2.392857 | 1.171679  | 0.878769  |
| C | -4.028319 | 0.008161  | 0.127367  | -4.138756 | 0.121488  | 0.134138  |
| N | -2.141311 | -1.002249 | 1.262554  | -2.259356 | -0.907819 | 1.263710  |
| H | -2.151279 | -0.743355 | 2.250917  | -2.262655 | -0.647554 | 2.251971  |
| H | -2.835244 | -1.755532 | 1.129190  | -2.963997 | -1.651900 | 1.133083  |
| O | -4.628411 | -1.001413 | 0.406207  | -4.746584 | -0.882142 | 0.418624  |
| O | -4.536935 | 1.095541  | -0.434880 | -4.639148 | 1.211308  | -0.429240 |
| H | -5.485071 | 0.965512  | -0.607889 | -5.589392 | 1.090680  | -0.597495 |
| H | -1.187196 | -1.322014 | 1.005032  | -1.312280 | -1.239719 | 1.007175  |
| H | 2.105693  | -2.592365 | -0.488577 | 2.012162  | -2.500774 | -0.670685 |
| O | 2.762654  | 1.775119  | 0.295003  | 2.446121  | 1.903380  | 0.552806  |
| O | 3.788913  | -0.587874 | 0.236209  | 3.664846  | -0.585983 | 0.295558  |
| C | 2.302027  | 3.126580  | 0.292337  | 3.766440  | 2.241761  | 0.071434  |
| H | 3.167965  | 3.729351  | 0.555047  | 3.900261  | 3.290251  | 0.329993  |
| H | 1.941402  | 3.416960  | -0.699002 | 4.527006  | 1.631851  | 0.553755  |
| H | 1.514762  | 3.277248  | 1.038123  | 3.818568  | 2.121511  | -1.013209 |
| C | 4.455489  | -1.851279 | 0.170811  | 4.318338  | -1.852284 | 0.159591  |
| H | 5.488285  | -1.648370 | 0.443196  | 5.337809  | -1.692246 | 0.502323  |
| H | 4.022532  | -2.561861 | 0.881385  | 3.838139  | -2.610019 | 0.785336  |
| H | 4.417212  | -2.262154 | -0.842194 | 4.329575  | -2.177718 | -0.884351 |

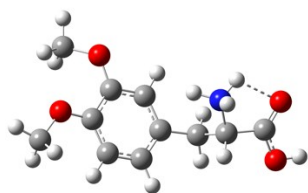

Isomer 3, 1.7kJ/mol

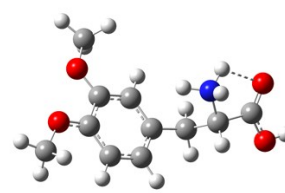

Isomer 4, 2.9kJ/mol

|   |           |           |           |           |           |           |
|---|-----------|-----------|-----------|-----------|-----------|-----------|
| C | 0.356088  | -0.370532 | -0.657425 | 0.240659  | -0.397297 | -0.662552 |
| C | -0.273429 | -1.601228 | -0.476234 | -0.378627 | -1.625550 | -0.466010 |
| C | -1.624127 | -1.659754 | -0.134961 | -1.734528 | -1.691357 | -0.127831 |
| C | -2.377172 | -0.496084 | 0.051954  | -2.493521 | -0.533575 | 0.024276  |
| C | -1.757448 | 0.762460  | -0.154059 | -1.874496 | 0.732617  | -0.182214 |
| C | -0.405413 | 0.799155  | -0.500419 | -0.518998 | 0.784226  | -0.509493 |
| H | 0.274829  | -2.526972 | -0.615191 | 0.174932  | -2.549420 | -0.597548 |
| H | 0.016101  | 1.779060  | -0.707277 | -0.063274 | 1.743200  | -0.728227 |
| C | 1.834615  | -0.271053 | -0.951119 | 1.719428  | -0.300717 | -0.959987 |
| H | 2.176266  | -1.084397 | -1.593753 | 2.042454  | -1.061894 | -1.672609 |
| H | 2.061573  | 0.665718  | -1.469260 | 1.960814  | 0.672105  | -1.398856 |
| C | 2.679941  | -0.348216 | 0.351330  | 2.570049  | -0.504777 | 0.325970  |
| H | 2.614348  | -1.347418 | 0.781102  | 2.516158  | -1.543838 | 0.648891  |
| C | 4.135419  | 0.053319  | 0.123886  | 4.019881  | -0.064178 | 0.142948  |
| N | 2.140903  | 0.631209  | 1.371192  | 2.018760  | 0.356764  | 1.441308  |
| H | 2.685745  | 1.504721  | 1.289735  | 2.572883  | 1.228173  | 1.467707  |
| H | 1.136091  | 0.801589  | 1.183805  | 1.019271  | 0.554307  | 1.252042  |
| O | 4.570956  | 1.115889  | 0.495320  | 4.441764  | 0.960121  | 0.623324  |
| O | 4.798989  | -0.878364 | -0.545747 | 4.694886  | -0.911505 | -0.619927 |
| H | 5.709534  | -0.580265 | -0.712684 | 5.601403  | -0.586050 | -0.754711 |
| H | 2.245756  | 0.293339  | 2.330037  | 2.100573  | -0.089431 | 2.357002  |
| H | -2.088773 | -2.627183 | -0.001698 | -2.197616 | -2.659850 | 0.002123  |
| O | -2.367968 | 1.956446  | 0.029734  | -2.680802 | 1.801013  | -0.051699 |
| O | -3.671726 | -0.476757 | 0.436758  | -3.798310 | -0.494341 | 0.339511  |
| C | -3.676339 | 2.203387  | -0.534067 | -2.170334 | 3.102912  | -0.333533 |
| H | -3.781947 | 3.286346  | -0.537685 | -3.009804 | 3.780794  | -0.199090 |
| H | -3.725426 | 1.825873  | -1.558212 | -1.370859 | 3.375649  | 0.364047  |
| H | -4.455838 | 1.747372  | 0.072092  | -1.807871 | 3.170256  | -1.363822 |
| C | -4.363408 | -1.714405 | 0.636674  | -4.512359 | -1.722372 | 0.506268  |
| H | -4.396034 | -2.299407 | -0.286616 | -5.534965 | -1.433387 | 0.736128  |
| H | -3.899004 | -2.298023 | 1.436537  | -4.496369 | -2.312952 | -0.414224 |
| H | -5.373912 | -1.438822 | 0.928849  | -4.102282 | -2.306898 | 1.335268  |

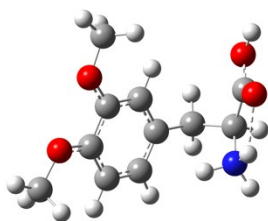

Isomer 5, 3.7kJ/mol

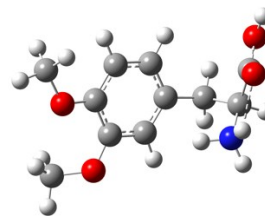

Isomer 6, 5.0kJ/mol

|   |           |           |           |           |           |           |
|---|-----------|-----------|-----------|-----------|-----------|-----------|
| C | 0.367453  | -0.679780 | -0.919337 | 0.546417  | -0.320388 | -0.911601 |
| C | -0.467235 | -1.777596 | -0.714870 | 0.248869  | 1.041611  | -0.923485 |
| C | -1.780039 | -1.603165 | -0.250181 | -1.001110 | 1.496029  | -0.503879 |
| C | -2.273462 | -0.331860 | 0.015829  | -1.981023 | 0.609822  | -0.046805 |
| C | -1.429379 | 0.800441  | -0.198201 | -1.706163 | -0.781197 | -0.059154 |
| C | -0.128011 | 0.611065  | -0.651395 | -0.450906 | -1.215346 | -0.488104 |
| H | -0.137371 | -2.776935 | -0.985133 | 0.978618  | 1.761376  | -1.277015 |
| H | 0.500665  | 1.472340  | -0.837255 | -0.303809 | -2.290727 | -0.543481 |
| C | 1.796945  | -0.884545 | -1.364746 | 1.913293  | -0.846061 | -1.285986 |
| H | 1.889111  | -1.826757 | -1.911017 | 1.837141  | -1.862178 | -1.682392 |
| H | 2.136789  | -0.095303 | -2.037352 | 2.384147  | -0.239413 | -2.060900 |
| C | 2.792948  | -0.927407 | -0.172727 | 2.888349  | -0.874213 | -0.080205 |
| H | 3.746157  | -1.355638 | -0.491042 | 3.766677  | -1.480752 | -0.314567 |
| C | 3.099924  | 0.420358  | 0.488712  | 3.394961  | 0.493083  | 0.395225  |
| N | 2.240642  | -1.786953 | 0.942600  | 2.220399  | -1.477163 | 1.137533  |
| H | 2.429361  | -1.297898 | 1.835347  | 1.192473  | -1.367786 | 1.038369  |
| H | 1.209406  | -1.853839 | 0.814993  | 2.438432  | -2.465766 | 1.268706  |
| O | 2.990958  | 0.591219  | 1.678497  | 3.336084  | 0.829608  | 1.552740  |
| O | 3.524254  | 1.316762  | -0.391365 | 3.922116  | 1.197144  | -0.595800 |
| H | 3.765580  | 2.138051  | 0.069471  | 4.277393  | 2.033374  | -0.249678 |
| H | 2.639066  | -2.726347 | 0.963796  | 2.524298  | -0.929080 | 1.961468  |
| H | -2.415102 | -2.469171 | -0.124686 | -1.204631 | 2.557978  | -0.522031 |
| O | -1.993201 | 1.991728  | 0.060282  | -2.557201 | -1.735966 | 0.384346  |
| O | -3.511170 | -0.052216 | 0.453384  | -3.188769 | 0.983493  | 0.428604  |
| C | -1.245891 | 3.185785  | -0.169685 | -3.945887 | -1.723431 | -0.018043 |
| H | -0.361531 | 3.226969  | 0.474419  | -4.513993 | -0.998463 | 0.560408  |
| H | -0.951916 | 3.270011  | -1.220359 | -4.030044 | -1.503696 | -1.084979 |
| H | -1.916752 | 4.002403  | 0.085994  | -4.305245 | -2.731717 | 0.177587  |
| C | -4.439631 | -1.122335 | 0.645870  | -3.533398 | 2.372981  | 0.454443  |
| H | -4.624837 | -1.653777 | -0.292131 | -2.848488 | 2.934175  | 1.096266  |
| H | -4.082873 | -1.820157 | 1.409463  | -3.536720 | 2.795407  | -0.554197 |
| H | -5.358700 | -0.650999 | 0.985295  | -4.537287 | 2.415830  | 0.870155  |

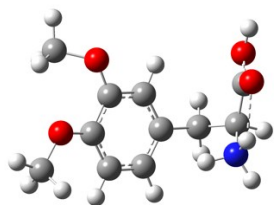

Isomer 7, 6.0kJ/mol

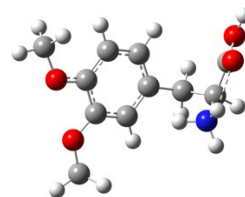

Isomer 8, 6.5kJ/mol

|   |           |           |           |           |           |           |
|---|-----------|-----------|-----------|-----------|-----------|-----------|
| C | 0.541602  | -0.611905 | -0.932581 | -0.435173 | 0.267282  | -0.866271 |
| C | -0.244096 | -1.755501 | -0.759723 | -0.218557 | -1.104191 | -0.814169 |
| C | -1.557880 | -1.652063 | -0.290683 | 1.018576  | -1.614935 | -0.406483 |
| C | -2.111178 | -0.410053 | 0.021840  | 2.060780  | -0.766932 | -0.042351 |
| C | -1.332441 | 0.762585  | -0.180983 | 1.860333  | 0.642056  | -0.104591 |
| C | -0.025230 | 0.635828  | -0.642374 | 0.618404  | 1.137409  | -0.502405 |
| H | 0.133968  | -2.732860 | -1.046272 | -0.996859 | -1.796287 | -1.115929 |
| H | 0.529231  | 1.554732  | -0.796205 | 0.487789  | 2.207910  | -0.614849 |
| C | 1.981171  | -0.727456 | -1.380224 | -1.782168 | 0.845545  | -1.238188 |
| H | 2.135724  | -1.664422 | -1.921824 | -1.671453 | 1.871054  | -1.600281 |
| H | 2.264930  | 0.079620  | -2.057663 | -2.261272 | 0.279805  | -2.038796 |
| C | 2.974912  | -0.691983 | -0.190395 | -2.770505 | 0.863043  | -0.041719 |
| H | 3.963048  | -1.032719 | -0.508571 | -3.605131 | 1.538923  | -0.243559 |
| C | 3.161709  | 0.671664  | 0.487654  | -3.371398 | -0.494206 | 0.344478  |
| N | 2.501565  | -1.605398 | 0.919979  | -2.075661 | 1.341597  | 1.215623  |
| H | 1.477788  | -1.742527 | 0.811980  | -1.053150 | 1.206554  | 1.095078  |
| H | 2.964779  | -2.514835 | 0.920447  | -2.262945 | 2.321073  | 1.432554  |
| O | 3.064884  | 0.807154  | 1.683054  | -3.338491 | -0.908384 | 1.477851  |
| O | 3.473444  | 1.619352  | -0.383337 | -3.942617 | -1.094231 | -0.689091 |
| H | 3.625380  | 2.457911  | 0.085033  | -4.354841 | -1.925667 | -0.398998 |
| H | 2.671900  | -1.113607 | 1.815873  | -2.395648 | 0.734996  | 1.992303  |
| H | -2.146231 | -2.551562 | -0.172206 | 1.164804  | -2.686147 | -0.388834 |
| O | -1.747863 | 2.014155  | 0.114982  | 2.926110  | 1.394659  | 0.223107  |
| O | -3.350269 | -0.230358 | 0.527623  | 3.281399  | -1.159865 | 0.356189  |
| C | -3.066702 | 2.466901  | -0.264757 | 2.848239  | 2.812677  | 0.096071  |
| H | -3.005213 | 3.553317  | -0.252648 | 2.624580  | 3.105520  | -0.934376 |
| H | -3.312526 | 2.124031  | -1.272422 | 2.098485  | 3.231917  | 0.776308  |
| H | -3.817568 | 2.121727  | 0.442414  | 3.831304  | 3.185285  | 0.373807  |
| C | -4.195825 | -1.366674 | 0.731918  | 3.583177  | -2.557272 | 0.401093  |
| H | -4.395185 | -1.882342 | -0.211677 | 4.615097  | -2.619586 | 0.737747  |
| H | -3.753531 | -2.059263 | 1.453790  | 2.934107  | -3.077203 | 1.111964  |
| H | -5.125266 | -0.969900 | 1.133363  | 3.493308  | -3.009597 | -0.590737 |

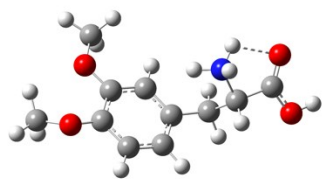

Isomer 9, 8.7kJ/mol

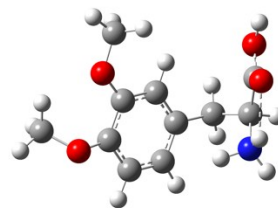

Isomer 10, 9.4kJ/mol

|   |           |           |           |           |           |           |
|---|-----------|-----------|-----------|-----------|-----------|-----------|
| C | 0.284013  | -0.500389 | -0.580444 | 0.440047  | -0.795356 | -0.855514 |
| C | -0.203976 | -1.766670 | -0.257073 | -0.217798 | -1.985744 | -0.528572 |
| C | -1.533804 | -1.922786 | 0.124226  | -1.517586 | -1.952934 | -0.017344 |
| C | -2.406627 | -0.838011 | 0.202174  | -2.184842 | -0.750373 | 0.185757  |
| C | -1.918550 | 0.455906  | -0.111008 | -1.519887 | 0.465118  | -0.135088 |
| C | -0.580399 | 0.606242  | -0.497546 | -0.223104 | 0.424391  | -0.652948 |
| H | 0.433516  | -2.641529 | -0.332748 | 0.241122  | -2.946542 | -0.745677 |
| H | -0.218001 | 1.586814  | -0.783334 | 0.273623  | 1.349776  | -0.914892 |
| C | 1.737749  | -0.292766 | -0.942955 | 1.869306  | -0.834352 | -1.346495 |
| H | 2.086727  | -1.031292 | -1.667550 | 2.066015  | -1.782259 | -1.853859 |
| H | 1.884144  | 0.692980  | -1.394221 | 2.081089  | -0.041503 | -2.065463 |
| C | 2.654604  | -0.424895 | 0.305122  | 2.900226  | -0.688936 | -0.193259 |
| H | 2.695753  | -1.462859 | 0.633245  | 3.890140  | -1.005068 | -0.530292 |
| C | 4.057211  | 0.125359  | 0.059181  | 3.050319  | 0.720108  | 0.390793  |
| N | 2.086908  | 0.398131  | 1.441568  | 2.508849  | -1.554374 | 0.984609  |
| H | 2.574807  | 1.308809  | 1.443654  | 2.669571  | -1.000921 | 1.844654  |
| H | 1.069592  | 0.518103  | 1.295068  | 1.491566  | -1.761384 | 0.914019  |
| O | 4.418131  | 1.181362  | 0.520064  | 2.963598  | 0.937061  | 1.574688  |
| O | 4.762267  | -0.671312 | -0.729987 | 3.320022  | 1.617170  | -0.547907 |
| H | 5.635287  | -0.279119 | -0.903137 | 3.471341  | 2.484884  | -0.136419 |
| H | 2.239372  | -0.036989 | 2.353735  | 3.026649  | -2.432915 | 1.029351  |
| H | -1.933235 | -2.901094 | 0.362336  | -2.047722 | -2.867567 | 0.218224  |
| O | -2.794527 | 1.479334  | 0.008706  | -2.203856 | 1.602457  | 0.112731  |
| O | -3.658655 | -1.087141 | 0.646744  | -3.411997 | -0.810322 | 0.749590  |
| C | -2.394663 | 2.798830  | -0.363440 | -1.612617 | 2.865554  | -0.198042 |
| H | -3.272604 | 3.423620  | -0.216771 | -2.356287 | 3.611074  | 0.073534  |
| H | -1.584146 | 3.161929  | 0.276975  | -0.704943 | 3.028730  | 0.391102  |
| H | -2.090178 | 2.838127  | -1.413471 | -1.390145 | 2.944611  | -1.266219 |
| C | -4.804856 | -0.550816 | -0.049590 | -4.518391 | -0.083510 | 0.171420  |
| H | -4.677939 | -0.658279 | -1.129720 | -4.477549 | 0.970989  | 0.436181  |
| H | -5.645269 | -1.157772 | 0.280905  | -4.522953 | -0.201089 | -0.915218 |
| H | -4.968108 | 0.493659  | 0.207963  | -5.409643 | -0.544914 | 0.591646  |

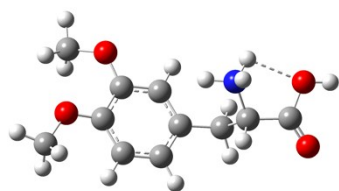

Isomer 11, 15.1kJ/mol

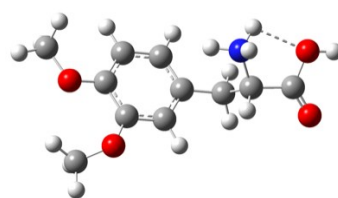

Isomer 12, 15.2kJ/mol

|   |           |           |           |           |           |           |
|---|-----------|-----------|-----------|-----------|-----------|-----------|
| C | 0.349783  | -0.367338 | -0.665041 | -0.347499 | -0.085017 | -0.693034 |
| C | -0.280554 | -1.598571 | -0.487619 | 0.243133  | -1.343839 | -0.826591 |
| C | -1.629453 | -1.658086 | -0.140255 | 1.593858  | -1.531562 | -0.515798 |
| C | -2.380813 | -0.494814 | 0.056381  | 2.376953  | -0.472212 | -0.056101 |
| C | -1.760816 | 0.764229  | -0.145220 | 1.791300  | 0.818995  | 0.063866  |
| C | -0.410742 | 0.801763  | -0.497945 | 0.445509  | 0.982643  | -0.248282 |
| H | 0.266570  | -2.523713 | -0.634624 | -0.325778 | -2.180497 | -1.220845 |
| H | 0.009947  | 1.782781  | -0.701190 | 0.041027  | 1.985466  | -0.157087 |
| C | 1.827023  | -0.272742 | -0.968819 | -1.817204 | 0.120252  | -0.982876 |
| H | 2.164235  | -1.091626 | -1.606921 | -1.999527 | 1.030081  | -1.558652 |
| H | 2.058021  | 0.659613  | -1.493716 | -2.213692 | -0.715023 | -1.568256 |
| C | 2.674257  | -0.353938 | 0.329335  | -2.630852 | 0.262203  | 0.330455  |
| H | 2.538009  | -1.329897 | 0.794812  | -2.327553 | 1.167389  | 0.856014  |
| C | 4.159859  | -0.154427 | 0.048294  | -4.130024 | 0.334905  | 0.065239  |
| N | 2.160601  | 0.677280  | 1.321831  | -2.288536 | -0.906098 | 1.241565  |
| H | 1.129443  | 0.734051  | 1.222029  | -2.448754 | -0.693778 | 2.228825  |
| H | 2.395302  | 0.440150  | 2.288342  | -2.861382 | -1.722487 | 1.002300  |
| O | 4.834891  | -0.986448 | -0.476201 | -4.659007 | 1.300837  | -0.392766 |
| O | 4.573882  | 1.079996  | 0.420065  | -4.744240 | -0.834594 | 0.365622  |
| H | 5.509969  | 1.195329  | 0.184811  | -5.688286 | -0.774075 | 0.142133  |
| H | 2.568467  | 1.596965  | 1.122238  | -1.287605 | -1.133991 | 1.095568  |
| H | -2.093971 | -2.626007 | -0.010278 | 2.028563  | -2.514536 | -0.634285 |
| O | -2.370018 | 1.957848  | 0.049604  | 2.441302  | 1.904190  | 0.541614  |
| O | -3.673372 | -0.476388 | 0.447050  | 3.671061  | -0.580764 | 0.311465  |
| C | -3.676113 | 2.210716  | -0.517049 | 3.754829  | 2.250508  | 0.047306  |
| H | -4.457626 | 1.742795  | 0.077321  | 4.523557  | 1.643015  | 0.519692  |
| H | -3.784831 | 3.293291  | -0.503643 | 3.795505  | 2.133745  | -1.038277 |
| H | -3.718505 | 1.849824  | -1.547523 | 3.886258  | 3.298893  | 0.307330  |
| C | -4.365371 | -1.714701 | 0.643603  | 4.332051  | -1.844408 | 0.187618  |
| H | -4.402615 | -2.294665 | -0.282628 | 5.350514  | -1.675059 | 0.528853  |
| H | -3.897783 | -2.302807 | 1.438246  | 3.856372  | -2.598972 | 0.820619  |
| H | -5.374255 | -1.439662 | 0.941774  | 4.345277  | -2.179652 | -0.853183 |

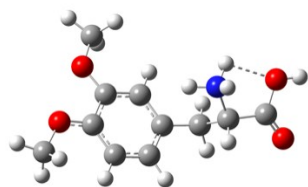

Isomer 13, 16.5kJ/mol

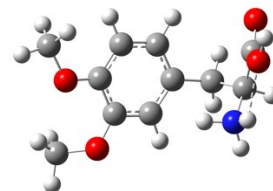

Isomer 14, 17.7kJ/mol

|   |           |           |           |           |           |           |
|---|-----------|-----------|-----------|-----------|-----------|-----------|
| C | 0.236186  | -0.370721 | -0.661591 | 0.547541  | -0.307701 | -0.938689 |
| C | -0.372031 | -1.606294 | -0.470783 | 0.232907  | 1.051111  | -0.963741 |
| C | -1.726041 | -1.686887 | -0.129603 | -1.015064 | 1.495142  | -0.526956 |
| C | -2.495655 | -0.536845 | 0.029211  | -1.975346 | 0.603594  | -0.039373 |
| C | -1.888580 | 0.736008  | -0.171205 | -1.682160 | -0.783449 | -0.034961 |
| C | -0.534593 | 0.802206  | -0.500297 | -0.430905 | -1.208272 | -0.483028 |
| H | 0.189020  | -2.524284 | -0.611752 | 0.949030  | 1.773327  | -1.338204 |
| H | -0.087269 | 1.767031  | -0.710033 | -0.273747 | -2.282835 | -0.527585 |
| C | 1.711902  | -0.265335 | -0.975299 | 1.911841  | -0.819944 | -1.345544 |
| H | 2.027883  | -1.008213 | -1.710383 | 1.840371  | -1.833700 | -1.749908 |
| H | 1.951846  | 0.717942  | -1.391605 | 2.362620  | -0.197964 | -2.120327 |
| C | 2.573251  | -0.511826 | 0.292490  | 2.908665  | -0.833918 | -0.163809 |
| H | 2.451640  | -1.542836 | 0.623017  | 3.806520  | -1.403239 | -0.419225 |
| C | 4.053541  | -0.256624 | 0.033650  | 3.384764  | 0.569294  | 0.231783  |
| N | 2.051626  | 0.369641  | 1.416672  | 2.275535  | -1.525228 | 1.034792  |
| H | 2.461616  | 1.307392  | 1.351222  | 1.264541  | -1.287275 | 1.044831  |
| H | 1.022020  | 0.436591  | 1.312607  | 2.354971  | -2.542647 | 0.970848  |
| O | 4.738762  | -1.005121 | -0.593195 | 3.712069  | 1.392416  | -0.566764 |
| O | 4.450769  | 0.929526  | 0.554297  | 3.432888  | 0.717733  | 1.575344  |
| H | 5.383809  | 1.087298  | 0.332003  | 3.780546  | 1.598011  | 1.795798  |
| H | 2.276491  | -0.002033 | 2.342216  | 2.701922  | -1.204143 | 1.910380  |
| H | -2.179621 | -2.660446 | -0.004251 | -1.232538 | 2.554077  | -0.558645 |
| O | -2.704807 | 1.796534  | -0.032209 | -2.513611 | -1.740718 | 0.442654  |
| O | -3.799927 | -0.511500 | 0.347091  | -3.180047 | 0.968474  | 0.450803  |
| C | -2.209460 | 3.103393  | -0.315851 | -3.901132 | -1.766421 | 0.037041  |
| H | -3.055433 | 3.772539  | -0.178169 | -4.480234 | -1.019928 | 0.575951  |
| H | -1.410274 | 3.384977  | 0.378749  | -3.984092 | -1.602799 | -1.040202 |
| H | -1.851538 | 3.174719  | -1.347512 | -4.249041 | -2.767699 | 0.282864  |
| C | -4.502559 | -1.747122 | 0.507874  | -3.547574 | 2.352355  | 0.449708  |
| H | -5.527384 | -1.468733 | 0.740852  | -4.546262 | 2.388338  | 0.878427  |
| H | -4.482501 | -2.332158 | -0.416019 | -2.863560 | 2.939748  | 1.068682  |
| H | -4.085839 | -2.332505 | 1.332906  | -3.571406 | 2.751343  | -0.568098 |

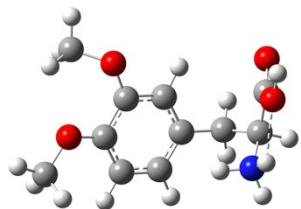

Isomer 15, 18.4kJ/mol

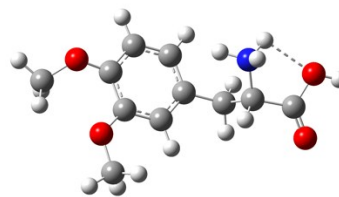

Isomer 16, 19.3kJ/mol

|   |           |           |           |           |           |           |
|---|-----------|-----------|-----------|-----------|-----------|-----------|
| C | 0.539141  | -0.632889 | -0.929323 | -0.269118 | -0.267678 | -0.671707 |
| C | -0.246179 | -1.772992 | -0.732359 | 0.180148  | -1.590586 | -0.617825 |
| C | -1.556302 | -1.663716 | -0.255201 | 1.504096  | -1.867166 | -0.266248 |
| C | -2.106673 | -0.416716 | 0.043281  | 2.398897  | -0.849061 | 0.043292  |
| C | -1.327218 | 0.751694  | -0.178050 | 1.946099  | 0.499241  | 0.000793  |
| C | -0.025031 | 0.620697  | -0.651399 | 0.623150  | 0.768348  | -0.356566 |
| H | 0.131050  | -2.755096 | -1.003287 | -0.467169 | -2.406803 | -0.926698 |
| H | 0.528790  | 1.536450  | -0.824105 | 0.282481  | 1.795349  | -0.402293 |
| C | 1.972958  | -0.754750 | -1.399158 | -1.716433 | 0.036502  | -0.981851 |
| H | 2.125731  | -1.706426 | -1.915276 | -1.830743 | 0.962288  | -1.548844 |
| H | 2.242135  | 0.036702  | -2.100832 | -2.158546 | -0.764862 | -1.582059 |
| C | 2.981168  | -0.664185 | -0.228902 | -2.542250 | 0.215010  | 0.321414  |
| H | 3.971415  | -1.004246 | -0.542226 | -2.175682 | 1.080426  | 0.872909  |
| C | 3.163036  | 0.764622  | 0.297895  | -4.023754 | 0.422470  | 0.026741  |
| N | 2.530006  | -1.583965 | 0.896215  | -2.321562 | -0.996148 | 1.212465  |
| H | 1.491089  | -1.597370 | 0.890036  | -1.339770 | -1.312055 | 1.081829  |
| H | 2.858449  | -2.542246 | 0.759349  | -2.484477 | -0.790805 | 2.200727  |
| O | 3.326425  | 1.701592  | -0.421481 | -4.457225 | 1.444350  | -0.410611 |
| O | 3.165051  | 0.802165  | 1.649530  | -4.740921 | -0.698493 | 0.274847  |
| H | 3.313581  | 1.713582  | 1.952660  | -5.670890 | -0.552751 | 0.032221  |
| H | 2.854998  | -1.237046 | 1.805121  | -2.958498 | -1.754268 | 0.944656  |
| H | -2.143608 | -2.561602 | -0.120252 | 1.874181  | -2.884814 | -0.243559 |
| O | -1.743910 | 2.004702  | 0.115486  | 2.848259  | 1.443453  | 0.341785  |
| O | -3.342657 | -0.227865 | 0.552600  | 3.638431  | -1.214064 | 0.439746  |
| C | -3.040062 | 2.467157  | -0.325983 | 2.481699  | 2.824485  | 0.286866  |
| H | -3.830501 | 2.096377  | 0.322901  | 3.372923  | 3.374931  | 0.578705  |
| H | -2.984756 | 3.552678  | -0.274997 | 2.188907  | 3.113838  | -0.726465 |
| H | -3.222409 | 2.157584  | -1.357943 | 1.673420  | 3.044912  | 0.990752  |
| C | -4.191701 | -1.359157 | 0.770243  | 4.805771  | -0.586317 | -0.135536 |
| H | -3.751017 | -2.045434 | 1.499146  | 5.627795  | -1.264542 | 0.083826  |
| H | -5.119440 | -0.955051 | 1.168300  | 4.689930  | -0.489261 | -1.217912 |
| H | -4.393633 | -1.884434 | -0.167446 | 4.988892  | 0.388005  | 0.312582  |



**3,4-(OMe)<sub>2</sub>-Phe·H<sup>+</sup>: The comparison between experimental IRMPD and calculated IR spectra**

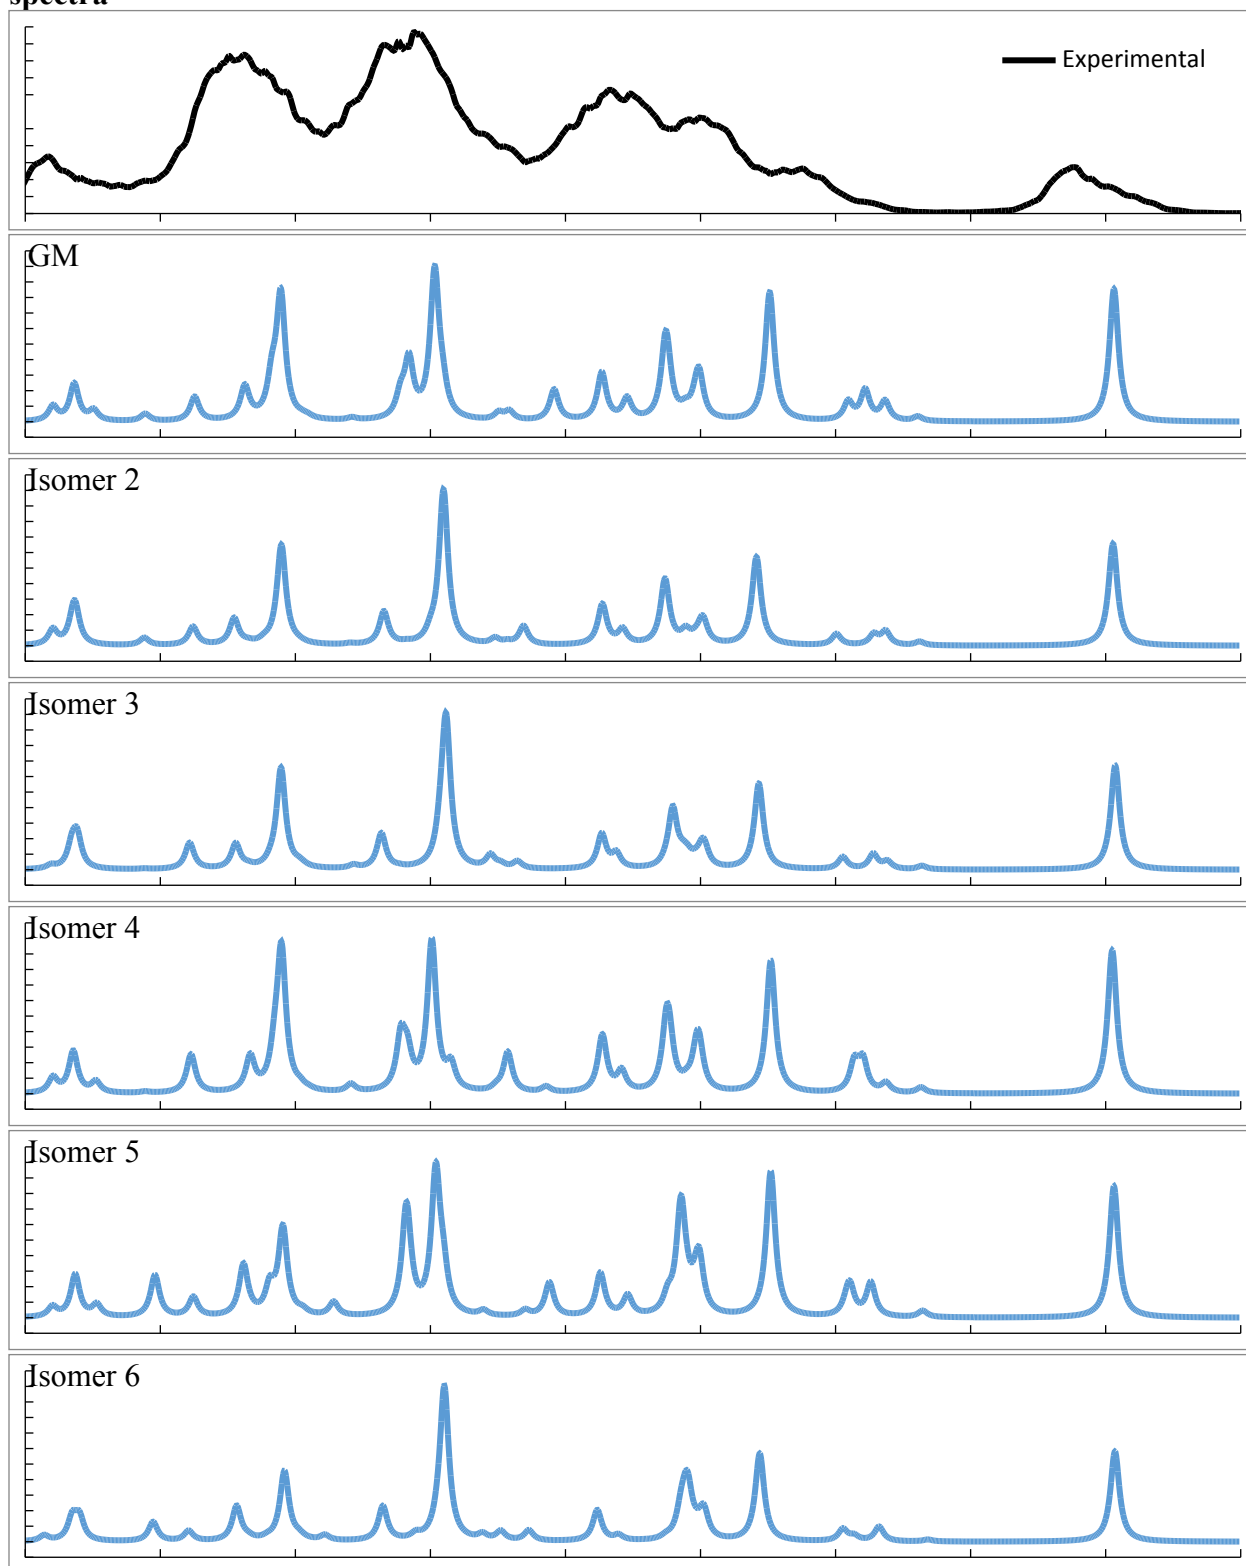

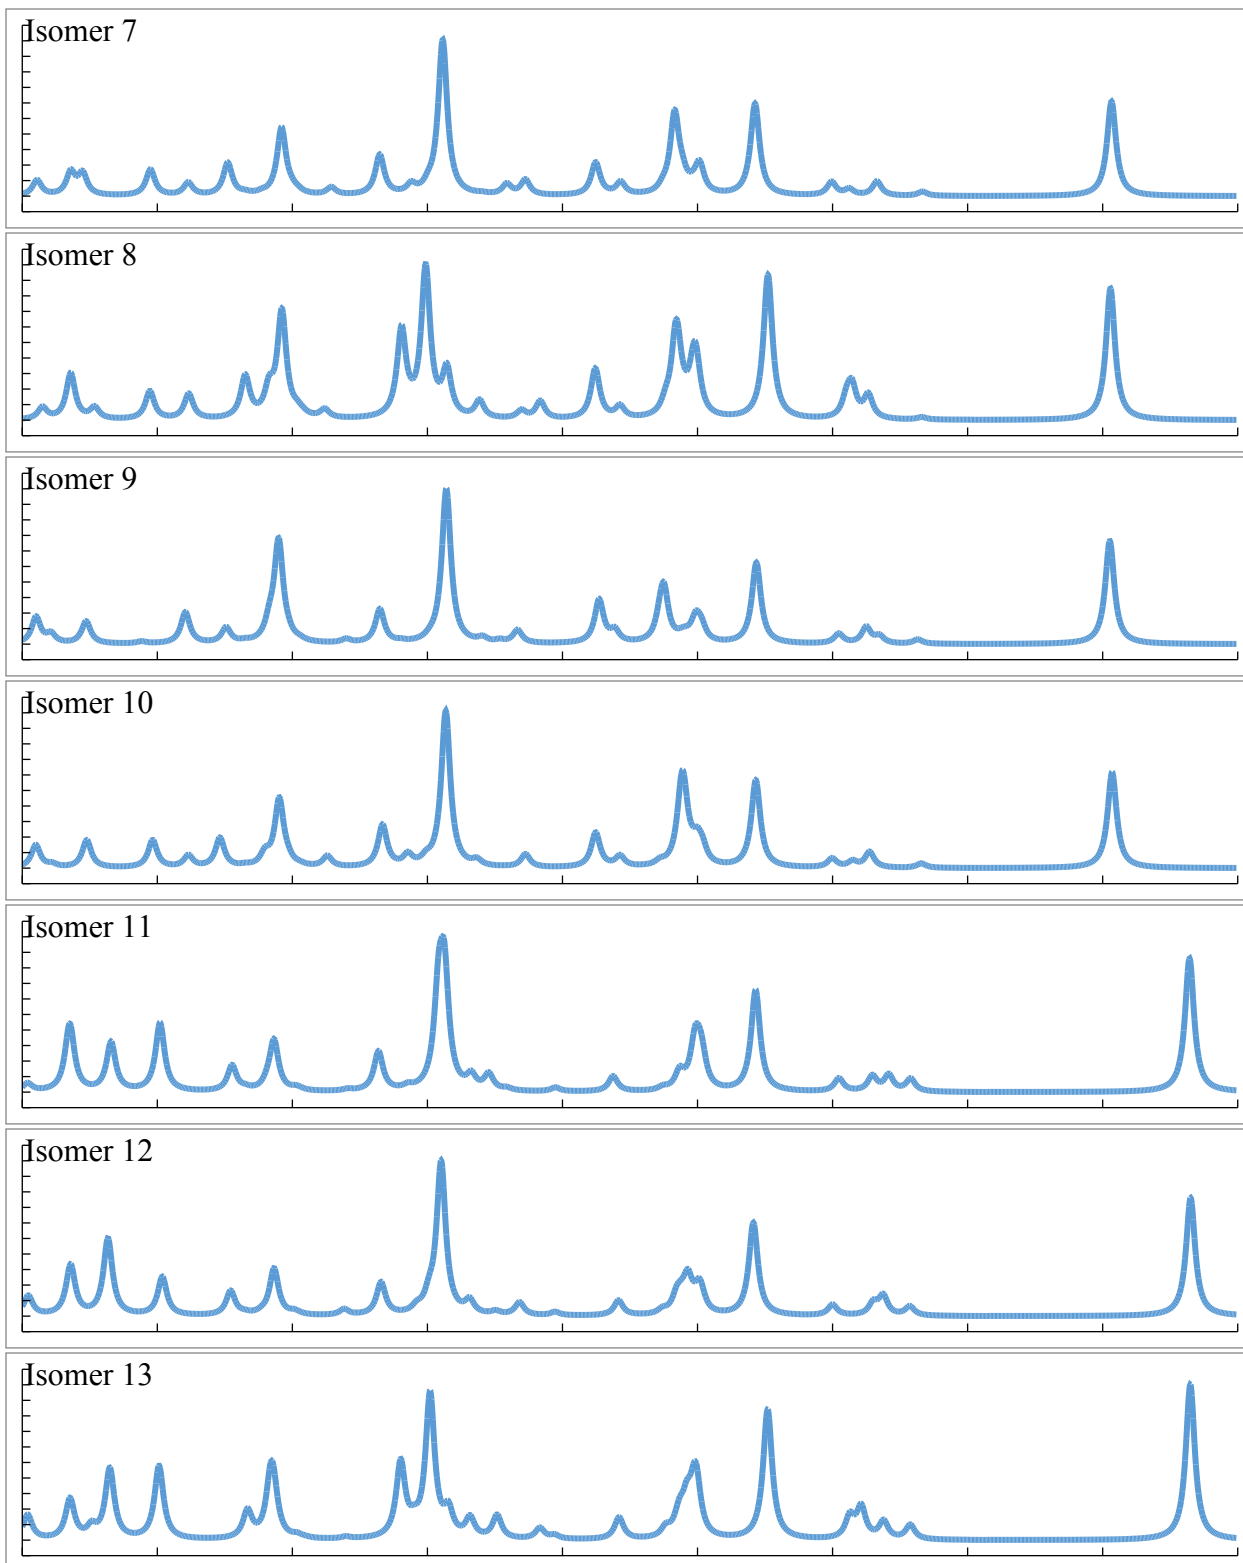

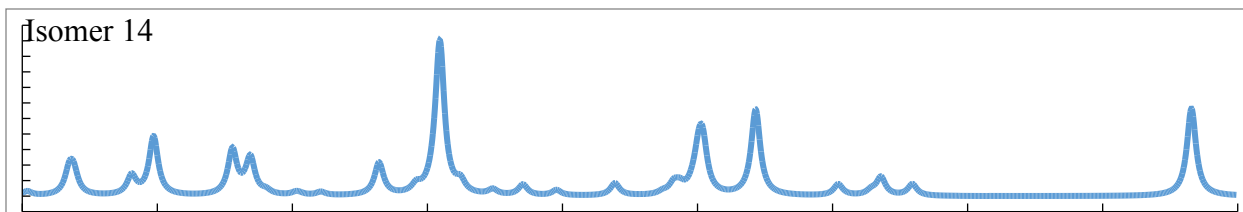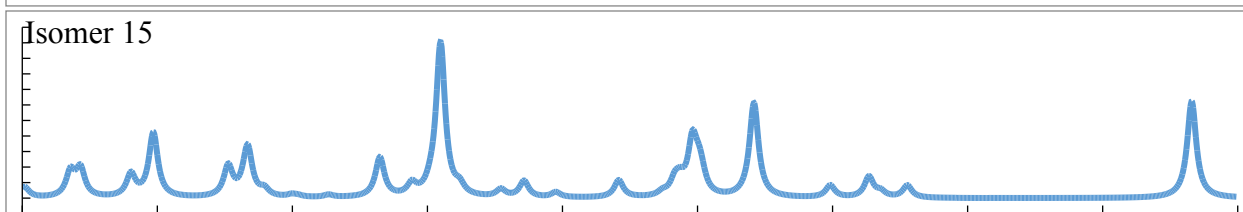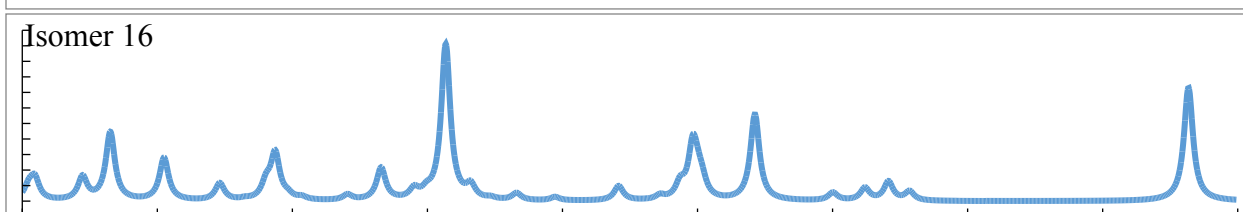

1000 1100 1200 1300 1400 1500 1600 1700 1800 1900

**4-NO<sub>2</sub>-Phe•H<sup>+</sup>****Table S10 The Gibbs' Energies and Relative energies of 4-NO<sub>2</sub>-Phe•H<sup>+</sup>**

| 4NO <sub>2</sub> -Phe Isomer | Gibbs (hartree) | Relative energy (kJ/mol) |
|------------------------------|-----------------|--------------------------|
| Isomer 1                     | -759.7142       | 0.00                     |
| Isomer 2                     | -759.7126       | 3.98                     |
| Isomer 3                     | -759.7091       | 13.25                    |
| Isomer 4                     | -759.7080       | 16.16                    |
| Isomer 5                     | -759.7079       | 16.56                    |
| Isomer 6                     | -759.7018       | 32.39                    |
| Isomer 7                     | -759.7001       | 37.00                    |
| Isomer 8                     | -759.6995       | 38.56                    |
| Isomer 9                     | -759.6988       | 40.25                    |

#### 4-NO<sub>2</sub>-Phe·H<sup>+</sup>: The XYZ atomic coordinates and structures

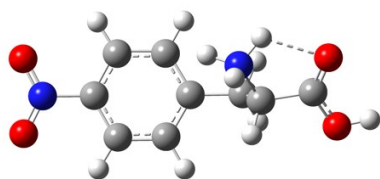

GM, 0.0kJ/mol

|   |           |           |           |
|---|-----------|-----------|-----------|
| C | -0.125317 | 0.239241  | -0.624459 |
| C | 0.577275  | -0.940596 | -0.907831 |
| C | 1.942249  | -1.039649 | -0.638785 |
| C | 2.588229  | 0.055903  | -0.085612 |
| C | 1.924164  | 1.245511  | 0.194335  |
| C | 0.562947  | 1.329838  | -0.074880 |
| H | 0.073723  | -1.775423 | -1.386390 |
| H | 0.042910  | 2.261347  | 0.123279  |
| C | -1.615319 | 0.317310  | -0.883173 |
| H | -1.890662 | 1.276616  | -1.326398 |
| H | -1.920911 | -0.460366 | -1.589471 |
| C | -2.441918 | 0.178925  | 0.419018  |
| H | -2.252076 | 1.021594  | 1.083761  |
| C | -3.940291 | 0.037763  | 0.136582  |
| N | -2.057219 | -1.088828 | 1.157075  |
| H | -2.723659 | -1.827311 | 0.872448  |
| H | -2.137416 | -0.985312 | 2.171802  |
| O | -4.508805 | -1.019295 | 0.257344  |
| O | -4.466703 | 1.180837  | -0.270020 |
| H | -5.410138 | 1.062303  | -0.477009 |
| H | -1.088990 | -1.358192 | 0.933292  |
| H | 2.474914  | 2.080711  | 0.606159  |
| H | 2.503010  | -1.937465 | -0.862205 |
| O | 4.588674  | -1.108207 | -0.029342 |
| O | 4.584221  | 0.948412  | 0.675369  |
| N | 4.045517  | -0.042310 | 0.210460  |

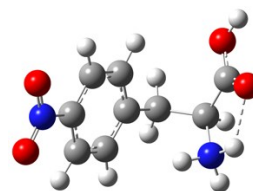

Isomer 2, 4.0kJ/mol

|   |           |           |           |
|---|-----------|-----------|-----------|
| C | -0.355727 | 0.533871  | -0.876381 |
| C | 0.524418  | 1.565312  | -0.513702 |
| C | 1.833784  | 1.285501  | -0.125199 |
| C | 2.249201  | -0.037959 | -0.109489 |
| C | 1.410819  | -1.082127 | -0.482157 |
| C | 0.105573  | -0.789517 | -0.862786 |
| H | 0.209533  | 2.602677  | -0.585748 |
| H | -0.546212 | -1.597025 | -1.176437 |
| C | -1.786732 | 0.859924  | -1.251717 |
| H | -1.854712 | 1.885675  | -1.623175 |
| H | -2.146517 | 0.211593  | -2.052566 |
| C | -2.778972 | 0.706531  | -0.074810 |
| H | -3.742051 | 1.147537  | -0.343182 |
| C | -3.057236 | -0.729828 | 0.395144  |
| N | -2.283331 | 1.419910  | 1.168661  |
| H | -1.254691 | 1.497352  | 1.139287  |
| H | -2.681767 | 2.353600  | 1.282886  |
| O | -2.992198 | -1.037459 | 1.559718  |
| O | -3.403490 | -1.519073 | -0.608689 |
| H | -3.632366 | -2.403168 | -0.272880 |
| H | -2.531650 | 0.821811  | 1.979227  |
| H | 1.786948  | -2.096508 | -0.477220 |
| H | 2.528304  | 2.069634  | 0.145361  |
| O | 4.341078  | 0.592091  | 0.656128  |
| O | 3.986775  | -1.518724 | 0.274826  |
| N | 3.645771  | -0.348213 | 0.307790  |

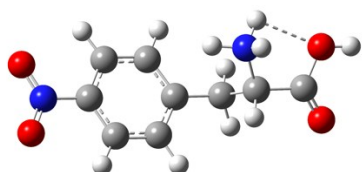

Isomer 3, 13.3kJ/mol

|   |           |           |           |
|---|-----------|-----------|-----------|
| C | -0.117623 | 0.222183  | -0.638025 |
| C | 0.588225  | -0.960726 | -0.899520 |
| C | 1.951459  | -1.054258 | -0.621291 |

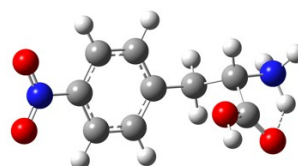

Isomer 4, 16.2kJ/mol

|   |           |           |           |
|---|-----------|-----------|-----------|
| C | 0.291033  | -0.660126 | 0.598777  |
| C | -0.440458 | -1.450461 | -0.294980 |
| C | -1.777465 | -1.172839 | -0.553831 |

|   |           |           |           |           |           |           |
|---|-----------|-----------|-----------|-----------|-----------|-----------|
| C | 2.593227  | 0.050033  | -0.080232 | -2.370553 | -0.098564 | 0.098345  |
| C | 1.926465  | 1.242690  | 0.178653  | -1.676417 | 0.694197  | 1.002001  |
| C | 0.566742  | 1.321602  | -0.100450 | -0.337575 | 0.405749  | 1.248668  |
| H | 0.088126  | -1.803841 | -1.366850 | 0.022454  | -2.300769 | -0.785710 |
| H | 0.044757  | 2.255821  | 0.079196  | 0.210415  | 1.011912  | 1.962077  |
| C | -1.605725 | 0.301888  | -0.909586 | 1.748001  | -0.970109 | 0.874966  |
| H | -1.876236 | 1.257447  | -1.364112 | 2.073836  | -0.456078 | 1.784700  |
| H | -1.912767 | -0.481344 | -1.609591 | 1.862983  | -2.047024 | 1.045802  |
| C | -2.437902 | 0.191298  | 0.388382  | 2.699093  | -0.583793 | -0.284716 |
| H | -2.182575 | 1.005970  | 1.067005  | 2.423895  | -1.095982 | -1.206211 |
| C | -3.938346 | 0.260106  | 0.101137  | 2.801784  | 0.931679  | -0.509373 |
| N | -2.083382 | -1.099415 | 1.116901  | 4.121093  | -0.991345 | 0.082104  |
| H | -2.378623 | -1.082115 | 2.096950  | 4.681390  | -1.233458 | -0.739992 |
| H | -2.551796 | -1.898832 | 0.676325  | 4.558311  | -0.157742 | 0.519224  |
| O | -4.471502 | 1.258929  | -0.270283 | 3.708554  | 1.567097  | -0.025164 |
| O | -4.531127 | -0.940379 | 0.286693  | 1.814659  | 1.397873  | -1.247797 |
| H | -5.476549 | -0.880083 | 0.065968  | 1.889192  | 2.364267  | -1.338232 |
| H | -1.063357 | -1.242192 | 1.078108  | 4.143351  | -1.782498 | 0.730669  |
| H | 2.473631  | 2.084746  | 0.581183  | -2.182846 | 1.510810  | 1.498509  |
| H | 2.514647  | -1.954463 | -0.828296 | -2.361669 | -1.773337 | -1.237790 |
| O | 4.593947  | -1.111981 | 0.004498  | -4.382755 | -0.516552 | -0.968562 |
| O | 4.584140  | 0.954302  | 0.680277  | -4.288527 | 1.161134  | 0.409324  |
| N | 4.048805  | -0.043012 | 0.225988  | -3.801294 | 0.206930  | -0.175619 |

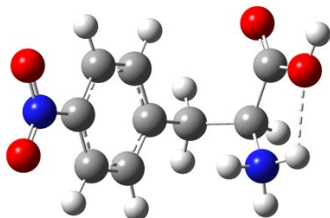

Isomer 5, 16.6kJ/mol

|   |           |           |           |
|---|-----------|-----------|-----------|
| C | -0.354959 | 0.547216  | -0.887713 |
| C | 0.502558  | 1.571573  | -0.455803 |
| C | 1.807898  | 1.292085  | -0.055159 |
| C | 2.243537  | -0.024593 | -0.097968 |
| C | 1.429298  | -1.059988 | -0.541320 |
| C | 0.126593  | -0.768978 | -0.933742 |
| H | 0.174372  | 2.607055  | -0.482702 |
| H | -0.508658 | -1.567733 | -1.298145 |
| C | -1.782709 | 0.870498  | -1.282654 |
| H | -1.856704 | 1.903703  | -1.632786 |
| H | -2.120968 | 0.232796  | -2.101287 |
| C | -2.792684 | 0.666806  | -0.134569 |

|   |           |           |           |
|---|-----------|-----------|-----------|
| H | -3.765101 | 1.084858  | -0.408865 |
| C | -3.040581 | -0.810633 | 0.205791  |
| N | -2.342095 | 1.416686  | 1.113602  |
| H | -2.547718 | 2.417021  | 1.048250  |
| H | -2.796674 | 1.030818  | 1.949309  |
| O | -3.155721 | -1.654916 | -0.627675 |
| O | -3.158971 | -0.992655 | 1.538509  |
| H | -3.367987 | -1.922594 | 1.731676  |
| H | -1.321076 | 1.311759  | 1.222234  |
| H | 1.820976  | -2.067697 | -0.582204 |
| H | 2.484917  | 2.071587  | 0.267918  |
| O | 4.310602  | 0.598191  | 0.738339  |
| O | 3.993725  | -1.498021 | 0.257386  |
| N | 3.635500  | -0.334727 | 0.333963  |

---

**4-NO<sub>2</sub>-Phe·H<sup>+</sup>: The comparison between experimental IRMPD and calculated IR spectra**

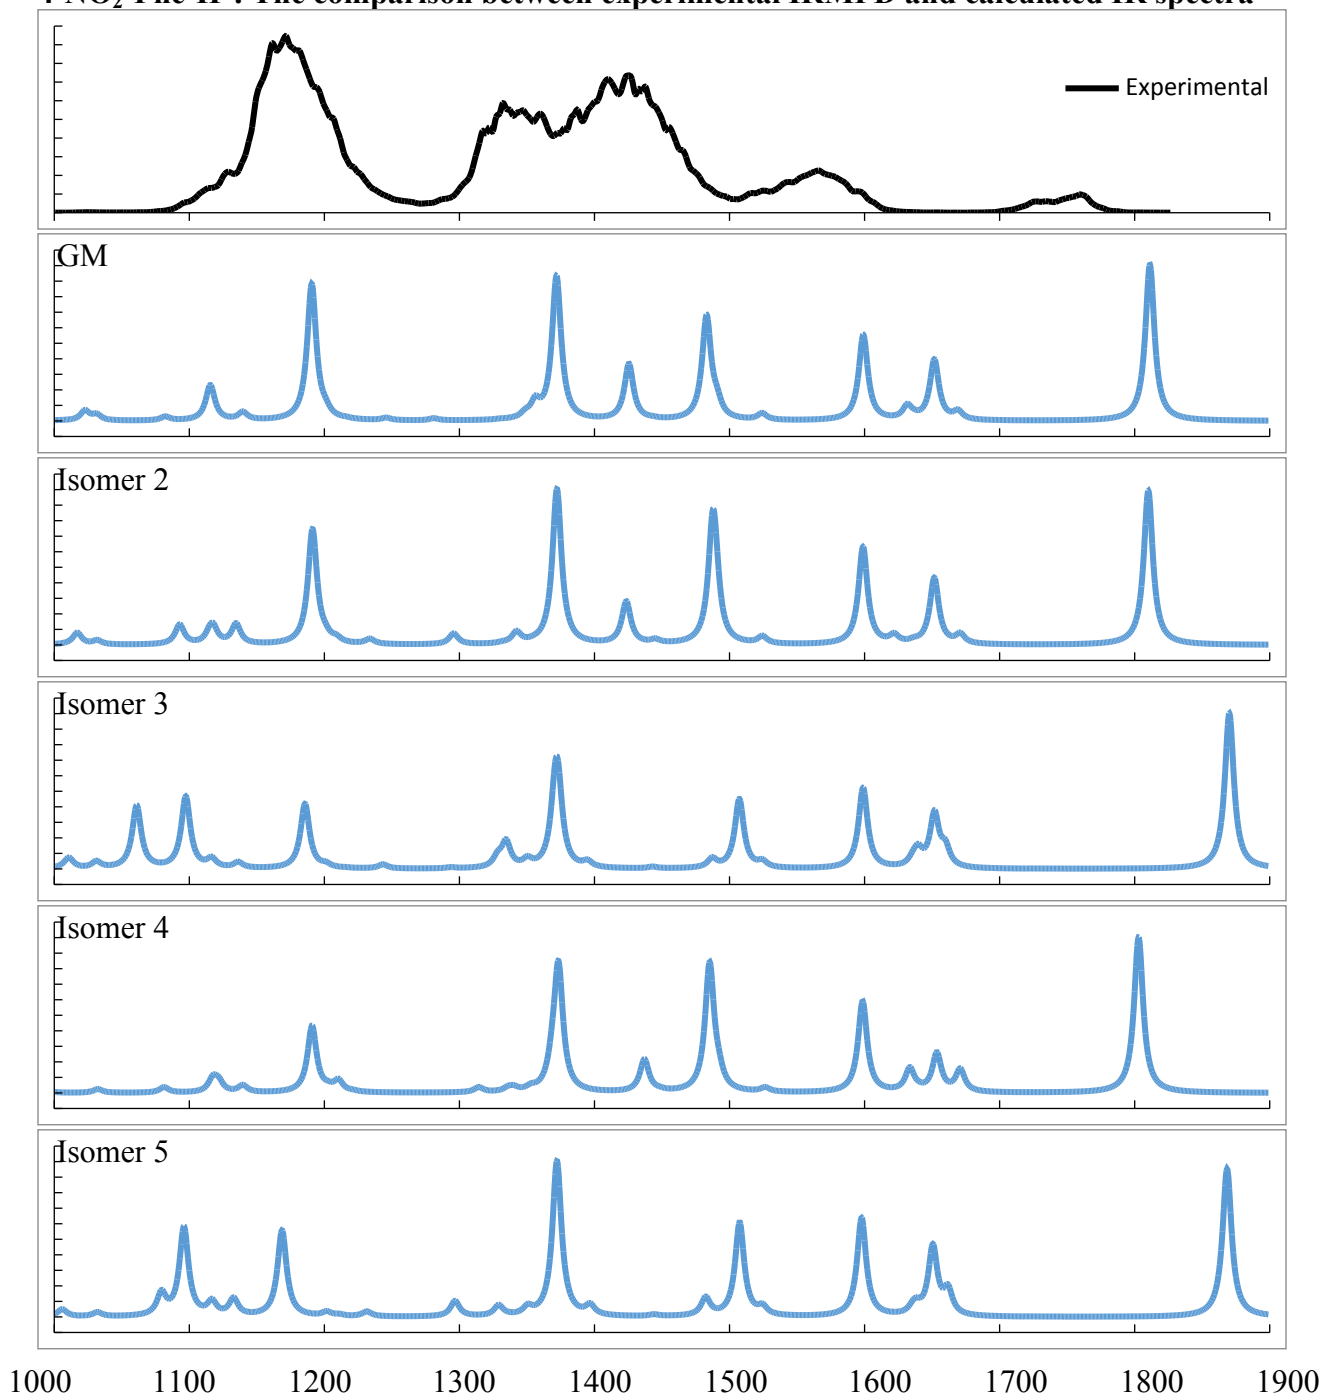



**Table S11 Assignments of vibrational modes of fluorinated Phe•H<sup>+</sup>**

| Structure                             | Vibrational modes (cm <sup>-1</sup> )   |  |                                     |                            |                                                             |                                                                       |                             |                                                |                                       |                                     |
|---------------------------------------|-----------------------------------------|--|-------------------------------------|----------------------------|-------------------------------------------------------------|-----------------------------------------------------------------------|-----------------------------|------------------------------------------------|---------------------------------------|-------------------------------------|
|                                       | <b>1780-1730</b>                        |  | <b>1460-1380</b>                    |                            |                                                             |                                                                       | <b>1190-1100</b>            |                                                |                                       |                                     |
|                                       | 1749                                    |  | 1428                                |                            | 1398                                                        |                                                                       | 1141                        |                                                |                                       |                                     |
| Phe-H <sup>+</sup>                    | C=O Stretch,<br>NH <sub>2</sub> Scissor |  | NH <sub>3</sub> Umbrella            |                            | COH Bend, CH &<br>NH <sub>2</sub> Wag                       |                                                                       | COH Bend,<br>Ring H Scissor |                                                |                                       |                                     |
| <b>IRMPD</b>                          | <b>1790-1745</b>                        |  | <b>1620-1540</b>                    |                            | <b>1500-1360</b>                                            |                                                                       |                             | <b>1330-1080</b>                               |                                       |                                     |
|                                       | 1774                                    |  | 1609                                | 1593                       | 1488                                                        | 1452                                                                  | 1397                        | 1260                                           | 1166                                  |                                     |
| 3F-Phe-H <sup>+</sup>                 | C=O Stretch,<br>NH <sub>2</sub> Scissor |  | Ring Stretch                        |                            | Ring<br>Rock                                                | NH <sub>3</sub><br>Umbrella                                           | COH<br>Bend<br>CH Wag       | C-F Stretch,<br>Ring Stretch                   | COH<br>Bend                           |                                     |
| <b>IRMPD</b>                          | <b>1860-1740</b>                        |  | <b>1630-1563</b>                    |                            | <b>1563-1375</b>                                            |                                                                       |                             | <b>1310 – 1063</b>                             |                                       |                                     |
|                                       | 1774                                    |  | 1609                                |                            | 1509                                                        |                                                                       | 1448                        | 1397                                           | 1243                                  | 1166                                |
| 4F-Phe-H <sup>+</sup>                 | C=O Stretch,<br>NH <sub>2</sub> Scissor |  | Ring<br>Stretch                     |                            | Ring H Wag                                                  |                                                                       | NH <sub>3</sub><br>Umbrella | COH<br>Bend,<br>CH &<br>NH <sub>2</sub><br>Wag | C-F Stretch,<br>Ring Stretch          | COH<br>Bend                         |
| <b>IRMPD</b>                          | <b>1850 – 1750</b>                      |  | <b>1650-1375</b>                    |                            |                                                             |                                                                       | <b>1375 – 1075</b>          |                                                |                                       |                                     |
|                                       | 1792                                    |  | 1497                                | 1469                       | 1436                                                        | 1408                                                                  |                             | 1382,<br>1168                                  | 1161                                  |                                     |
| 2,5F <sub>2</sub> -Phe-H <sup>+</sup> | C=O Stretch,<br>NH <sub>2</sub> Scissor |  | NH <sub>3</sub><br>Umbrella         | CH <sub>2</sub><br>Scissor | Ring<br>Stretch                                             | COH Bend,<br>CH & NH <sub>2</sub><br>Wag                              |                             | COH<br>Bend                                    | Asym. C-F<br>Stretch, Ring<br>Stretch |                                     |
| <b>IRMPD</b>                          | <b>1800 – 1740</b>                      |  | <b>1650-1550</b>                    |                            | <b>1500-1300</b>                                            |                                                                       |                             | <b>1230 – 1080</b>                             |                                       |                                     |
|                                       | 1774                                    |  | 1604                                |                            | 1454                                                        | 1397                                                                  | 1345                        | 1315                                           | 1167                                  | 1128                                |
| 3,5F <sub>2</sub> -Phe-H <sup>+</sup> | C=O Stretch,<br>NH <sub>2</sub> Scissor |  | Ring<br>Stretch                     |                            | NH <sub>3</sub><br>Umbrella<br>, CH <sub>2</sub><br>Scissor | COH Bend, CH, NH <sub>2</sub> &<br>CH <sub>2</sub> Wag, & C-F Stretch |                             |                                                | COH<br>Bend                           | Asym. C-F<br>Stretch, Ring<br>H Wag |
| <b>IRMPD</b>                          | <b>1790 – 1760</b>                      |  | <b>1540-1400</b>                    |                            |                                                             |                                                                       | <b>1200 – 1090</b>          |                                                |                                       |                                     |
|                                       | 1774                                    |  | 1509                                |                            | 1492                                                        |                                                                       | 1476                        |                                                | 1168                                  | 1109                                |
| F <sub>5</sub> -Phe-H <sup>+</sup>    | C=O Stretch,<br>NH <sub>2</sub> Scissor |  | Ring Stretch, CH <sub>2</sub> Twist |                            |                                                             |                                                                       | NH <sub>3</sub><br>Umbrella |                                                | COH<br>Bend                           | Asym. C-F<br>Stretch                |

**Table S12 Assignments of vibrational modes of protonated Phe derivatives (different EWGs/EDGs)**

| Structure                                 | Vibrational modes (cm <sup>-1</sup> )   |                                                            |                                       |                                                            |                                                |                            |          |
|-------------------------------------------|-----------------------------------------|------------------------------------------------------------|---------------------------------------|------------------------------------------------------------|------------------------------------------------|----------------------------|----------|
| <b>IRMPD</b>                              | <b>1800-1750</b>                        | <b>1480-1390</b>                                           |                                       |                                                            |                                                | <b>1200-1090</b>           |          |
| 3CN-Phe-H <sup>+</sup>                    | 1776                                    | 1452                                                       |                                       | 1397                                                       |                                                | 1166                       |          |
|                                           | C=O Stretch,<br>NH <sub>2</sub> Scissor | NH <sub>3</sub> Umbrella                                   |                                       | COH Bend, CH & NH <sub>2</sub><br>Wag                      |                                                | COH Bend                   |          |
| <b>IRMPD</b>                              | <b>1810-1700</b>                        | <b>1510-1270</b>                                           |                                       |                                                            |                                                | <b>1270-1040</b>           |          |
| 3CF <sub>3</sub> -Phe-H <sup>+</sup>      | 1776                                    | 1454                                                       | 1397                                  |                                                            | 1294                                           | 1166                       |          |
|                                           | C=O Stretch,<br>NH <sub>2</sub> Scissor | NH <sub>3</sub><br>Umbrella,<br>CH <sub>2</sub><br>Scissor | COH Bend, CH & NH <sub>2</sub><br>Wag |                                                            | Ring Stretch                                   | COH Bend                   |          |
| <b>IRMPD</b>                              | <b>1790 – 1700</b>                      | <b>1630-1500</b>                                           |                                       | <b>1500-1270</b>                                           |                                                | <b>1270 – 1070</b>         |          |
| 4NO <sub>2</sub> -Phe-H <sup>+</sup>      | 1758                                    | 1602                                                       | 1552                                  | 1439                                                       | 1383                                           | 1331                       |          |
|                                           | C=O Stretch,<br>NH <sub>2</sub> Scissor | Asymmetrical<br>N=O Stretch,<br>Ring Stretch               |                                       | NH <sub>3</sub><br>Umbrella,<br>CH <sub>2</sub><br>Scissor | COH<br>Bend,<br>CH &<br>NH <sub>2</sub><br>Wag | Symmetrical<br>N=O Stretch | COH Bend |
| <b>IRMPD</b>                              | <b>1860 – 1700</b>                      | <b>1670-1000</b>                                           |                                       |                                                            |                                                |                            |          |
| 3,4(MeO) <sub>2</sub> -Phe-H <sup>+</sup> | 1770                                    | 1521                                                       |                                       | 1445                                                       |                                                | 1278                       |          |
|                                           | C=O Stretch,<br>NH <sub>2</sub> Scissor | Ring H Wag                                                 |                                       | NH <sub>3</sub> & CH <sub>3</sub><br>Umbrella              |                                                | Ring Stretch               | COH Bend |

**Table S13** The calculated proton affinities and gas phase basicities of Phe and its derivatives at the B3LYP/6-311++G(d,p) level of theory.

| Phe Derivatives       | $-\Delta H$ (kJ/mol) | $-\Delta G$ (kJ/mol) |
|-----------------------|----------------------|----------------------|
| 3,4(MeO) <sub>2</sub> | 951.13               | 915.31               |
| Phe                   | 926.02               | 896.32               |
| 2,5F <sub>2</sub>     | 916.28               | 883.08               |
| 3F                    | 914.74               | 884.65               |
| 4F                    | 914.71               | 884.87               |
| 3CF <sub>3</sub>      | 908.84               | 875.64               |
| 3,5F <sub>2</sub>     | 903.98               | 873.96               |
| 3CN                   | 897.21               | 867.76               |
| 4NO <sub>2</sub>      | 891.75               | 862.61               |
| F <sub>5</sub>        | 890.37               | 854.93               |
